# Supplementary material for: Network Pharmacology Identifies the Mechanisms of Action of Tongxie Anchang Decoction in the Treatment of Irritable Bowel Syndrome with Diarrhea Predominant
Source: Evid Based Complement Alternat Med. 2020 Nov 17;2020:2723705. doi: 10.1155/2020/2723705 (PMC7685835; doi:10.1155/2020/2723705)
Supplement: Supplementary Materials — 1: the active compounds of TXACD. Supplementary materials 2: the information on potential targets of TXACD. Supplementary materials 3: the information on potential targets of IBS-D. Supplementary materials 4: raw data of GO enrichment analysis. Supplementary materials 5: raw data of KEGG enrichment analysis. [file 2723705.f1.zip]

Archive with 5 entries (5 files):
- supplementary material 5.xlsx
- supplementary material 1.docx
- supplementary material 2.docx
- supplementary material 3.docx
- supplementary material 4.xlsx
