# Supplementary material for: Network Pharmacology Identifies the Mechanisms of Action of Tongxie Anchang Decoction in the Treatment of Irritable Bowel Syndrome with Diarrhea Predominant
Source: Evid Based Complement Alternat Med. 2020 Nov 17;2020:2723705. doi: 10.1155/2020/2723705 (PMC7685835; doi:10.1155/2020/2723705)
Supplement: Supplementary Materials — 1: the active compounds of TXACD. Supplementary materials 2: the information on potential targets of TXACD. Supplementary materials 3: the information on potential targets of IBS-D. Supplementary materials 4: raw data of GO enrichment analysis. Supplementary materials 5: raw data of KEGG enrichment analysis. [file 2723705.f1.zip › supplementary material 4.xlsx]

## Sheet: Gene ID
symbol	entrezID
VEGFA	7422
MAPK3	5595
IL6	3569
TP53	7157
JUN	3725
STAT3	6774
TNF	7124
PTGS2	5743
MAPK1	5594
CASP3	836
MAPK8	5599
MMP9	4318
MYC	4609
EGFR	1956
EGF	1950
SRC	6714
BCL2L1	598
CXCL8	3576
MTOR	2475
CCND1	595
PTEN	5728
MAP2K1	5604
AKT1	207
IL10	3586
MMP2	4313
MAPK14	1432
CAT	847
CASP9	842
FOS	2353
ESR1	2099
CREB1	1385
CASP8	841
IL2	3558
HSP90AA1	3320
CCL2	6347
ERBB2	2064
STAT1	6772
CDKN1A	1026
JAK2	3717
IL1B	3553
IGF1R	3480
ICAM1	3383
EP300	2033
HIF1A	3091
TGFB1	7040
MMP1	4312
SERPINE1	5054
SPP1	6696
IFNG	3458
AR	367

## Sheet: GO enrichment analysis
ONTOLOGY	ID	Description	GeneRatio	BgRatio	pvalue	p.adjust	qvalue	geneID	Count
BP	GO:0032496	response to lipopolysaccharide	22/50	330/18670	7.78291e-26	2.58471e-22	6.76704e-23	MAPK3/IL6/JUN/TNF/PTGS2/MAPK1/CASP3/MAPK8/SRC/CXCL8/AKT1/IL10/MAPK14/CASP9/FOS/CASP8/CCL2/JAK2/IL1B/ICAM1/TGFB1/SERPINE1	22
BP	GO:0002237	response to molecule of bacterial origin	22/50	343/18670	1.83698e-25	3.0503e-22	7.98602e-23	MAPK3/IL6/JUN/TNF/PTGS2/MAPK1/CASP3/MAPK8/SRC/CXCL8/AKT1/IL10/MAPK14/CASP9/FOS/CASP8/CCL2/JAK2/IL1B/ICAM1/TGFB1/SERPINE1	22
BP	GO:0007568	aging	20/50	321/18670	8.32977e-23	9.22106e-20	2.41417e-20	MAPK3/TP53/JUN/STAT3/PTGS2/MAPK1/MTOR/PTEN/MAP2K1/AKT1/IL10/MAPK14/CAT/CASP9/FOS/CREB1/CDKN1A/ICAM1/TGFB1/SERPINE1	20
BP	GO:0033002	muscle cell proliferation	18/50	239/18670	5.60652e-22	4.65481e-19	1.21868e-19	IL6/JUN/STAT3/TNF/PTGS2/MAPK1/MMP9/EGFR/MTOR/PTEN/AKT1/IL10/MMP2/MAPK14/STAT1/CDKN1A/JAK2/IFNG	18
BP	GO:2000377	regulation of reactive oxygen species metabolic process	17/50	195/18670	7.51634e-22	4.99235e-19	1.30705e-19	TP53/STAT3/TNF/PTGS2/EGFR/MTOR/AKT1/IL10/MAPK14/HSP90AA1/CDKN1A/JAK2/IL1B/ICAM1/HIF1A/TGFB1/IFNG	17
BP	GO:0051090	regulation of DNA-binding transcription factor activity	21/50	432/18670	1.00432e-21	5.55889e-19	1.45538e-19	VEGFA/MAPK3/IL6/JUN/STAT3/TNF/MAPK1/MAPK8/PTEN/AKT1/IL10/MAPK14/CAT/FOS/ESR1/JAK2/IL1B/ICAM1/EP300/TGFB1/AR	21
BP	GO:0009314	response to radiation	21/50	448/18670	2.1419e-21	1.01618e-18	2.66046e-19	TP53/JUN/PTGS2/CASP3/MAPK8/MYC/EGFR/BCL2L1/MTOR/CCND1/AKT1/MAPK14/CAT/CASP9/FOS/CREB1/CDKN1A/ICAM1/EP300/HIF1A/TGFB1	21
BP	GO:2000379	positive regulation of reactive oxygen species metabolic process	14/50	102/18670	6.66546e-21	2.767e-18	7.2443e-19	TP53/TNF/PTGS2/EGFR/MTOR/AKT1/MAPK14/HSP90AA1/CDKN1A/JAK2/IL1B/ICAM1/TGFB1/IFNG	14
BP	GO:0072593	reactive oxygen species metabolic process	18/50	284/18670	1.29196e-20	4.76732e-18	1.24814e-18	TP53/STAT3/TNF/PTGS2/EGFR/MTOR/AKT1/IL10/MAPK14/CAT/HSP90AA1/CDKN1A/JAK2/IL1B/ICAM1/HIF1A/TGFB1/IFNG	18
BP	GO:0030099	myeloid cell differentiation	20/50	416/18670	1.47563e-20	4.90057e-18	1.28302e-18	VEGFA/JUN/STAT3/TNF/CASP3/MMP9/MYC/SRC/MTOR/MAPK14/CASP9/FOS/CREB1/CASP8/STAT1/JAK2/EP300/HIF1A/TGFB1/IFNG	20
BP	GO:0048608	reproductive structure development	20/50	431/18670	2.97575e-20	8.71963e-18	2.28289e-18	VEGFA/MAPK3/PTGS2/MAPK1/CASP3/EGFR/SRC/BCL2L1/CCND1/PTEN/MAP2K1/AKT1/IL10/MAPK14/ESR1/CASP8/ICAM1/HIF1A/SPP1/AR	20
BP	GO:0050673	epithelial cell proliferation	20/50	434/18670	3.41329e-20	8.71963e-18	2.28289e-18	VEGFA/JUN/STAT3/TNF/MAPK1/MYC/EGFR/MTOR/CCND1/PTEN/MAP2K1/AKT1/IL10/ESR1/CCL2/ERBB2/STAT1/HIF1A/TGFB1/AR	20
BP	GO:0061458	reproductive system development	20/50	434/18670	3.41329e-20	8.71963e-18	2.28289e-18	VEGFA/MAPK3/PTGS2/MAPK1/CASP3/EGFR/SRC/BCL2L1/CCND1/PTEN/MAP2K1/AKT1/IL10/MAPK14/ESR1/CASP8/ICAM1/HIF1A/SPP1/AR	20
BP	GO:0006979	response to oxidative stress	20/50	451/18670	7.29025e-20	1.72935e-17	4.52763e-18	MAPK3/IL6/TP53/JUN/TNF/PTGS2/MAPK1/CASP3/MAPK8/MMP9/EGFR/SRC/AKT1/IL10/MMP2/CAT/FOS/STAT1/JAK2/HIF1A	20
BP	GO:0046677	response to antibiotic	18/50	327/18670	1.63905e-19	3.62885e-17	9.50073e-18	IL6/TP53/JUN/STAT3/CASP3/SRC/BCL2L1/CCND1/PTEN/IL10/CAT/CASP9/CASP8/IL2/HSP90AA1/STAT1/JAK2/ICAM1	18
BP	GO:0048660	regulation of smooth muscle cell proliferation	15/50	169/18670	2.04123e-19	4.23683e-17	1.10925e-17	IL6/JUN/TNF/PTGS2/MMP9/EGFR/MTOR/PTEN/AKT1/IL10/MMP2/STAT1/CDKN1A/JAK2/IFNG	15
BP	GO:0048659	smooth muscle cell proliferation	15/50	171/18670	2.44535e-19	4.77707e-17	1.25069e-17	IL6/JUN/TNF/PTGS2/MMP9/EGFR/MTOR/PTEN/AKT1/IL10/MMP2/STAT1/CDKN1A/JAK2/IFNG	15
BP	GO:0097191	extrinsic apoptotic signaling pathway	16/50	224/18670	3.6873e-19	6.80308e-17	1.78112e-17	TNF/CASP3/SRC/BCL2L1/PTEN/AKT1/CASP9/CASP8/IL2/JAK2/IL1B/ICAM1/TGFB1/SERPINE1/IFNG/AR	16
BP	GO:0031667	response to nutrient levels	20/50	499/18670	5.3291e-19	9.31471e-17	2.43869e-17	MAPK3/TP53/JUN/PTGS2/MAPK1/MAPK8/EGFR/SRC/MTOR/CCND1/PTEN/AKT1/CAT/CREB1/STAT1/CDKN1A/IL1B/ICAM1/TGFB1/SPP1	20
BP	GO:0000302	response to reactive oxygen species	16/50	232/18670	6.50029e-19	1.07937e-16	2.82591e-17	MAPK3/IL6/JUN/TNF/MAPK1/CASP3/MAPK8/MMP9/EGFR/SRC/AKT1/IL10/MMP2/CAT/FOS/STAT1	16
BP	GO:0071216	cellular response to biotic stimulus	16/50	236/18670	8.56425e-19	1.35438e-16	3.5459e-17	MAPK3/IL6/TP53/TNF/MAPK1/MAPK8/SRC/CXCL8/AKT1/IL10/MAPK14/CCL2/IL1B/ICAM1/TGFB1/SERPINE1	16
BP	GO:0048732	gland development	19/50	434/18670	9.68902e-19	1.4626e-16	3.82925e-17	VEGFA/MAPK3/JUN/TNF/MAPK1/EGFR/EGF/SRC/CCND1/PTEN/MAP2K1/AKT1/IL10/ESR1/CREB1/JAK2/HIF1A/TGFB1/AR	19
BP	GO:0018108	peptidyl-tyrosine phosphorylation	18/50	363/18670	1.06192e-18	1.53332e-16	4.0144e-17	VEGFA/MAPK3/IL6/TP53/STAT3/TNF/EGFR/EGF/SRC/MTOR/MAP2K1/IL2/ERBB2/JAK2/IGF1R/ICAM1/TGFB1/IFNG	18
BP	GO:0010038	response to metal ion	18/50	364/18670	1.11532e-18	1.54332e-16	4.04059e-17	MAPK3/JUN/PTGS2/MAPK1/CASP3/MAPK8/MMP9/EGFR/CCND1/PTEN/AKT1/CAT/CASP9/FOS/CREB1/CASP8/ICAM1/HIF1A	18
BP	GO:0018212	peptidyl-tyrosine modification	18/50	366/18670	1.22978e-18	1.63364e-16	4.27706e-17	VEGFA/MAPK3/IL6/TP53/STAT3/TNF/EGFR/EGF/SRC/MTOR/MAP2K1/IL2/ERBB2/JAK2/IGF1R/ICAM1/TGFB1/IFNG	18
BP	GO:0034599	cellular response to oxidative stress	17/50	302/18670	1.37905e-18	1.76147e-16	4.61171e-17	MAPK3/IL6/TP53/JUN/TNF/MAPK1/MAPK8/MMP9/EGFR/SRC/AKT1/IL10/MMP2/CAT/FOS/JAK2/HIF1A	17
BP	GO:1904951	positive regulation of establishment of protein localization	19/50	456/18670	2.44002e-18	2.99819e-16	7.8496e-17	MAPK3/IL6/TP53/TNF/PTGS2/MAPK1/MAPK8/EGFR/SRC/IL10/MAPK14/CASP8/IL2/ERBB2/JAK2/IL1B/HIF1A/TGFB1/IFNG	19
BP	GO:1901214	regulation of neuron death	17/50	313/18670	2.52784e-18	2.99819e-16	7.8496e-17	TP53/JUN/STAT3/TNF/CASP3/BCL2L1/MTOR/AKT1/IL10/CASP9/FOS/CREB1/CASP8/CCL2/JAK2/HIF1A/IFNG	17
BP	GO:0048545	response to steroid hormone	18/50	385/18670	3.02735e-18	3.46684e-16	9.07656e-17	IL6/TNF/PTGS2/CASP3/EGFR/SRC/CCND1/IL10/CASP9/FOS/ESR1/CDKN1A/JAK2/ICAM1/EP300/TGFB1/SPP1/AR	18
BP	GO:0001819	positive regulation of cytokine production	19/50	464/18670	3.37429e-18	3.73533e-16	9.77951e-17	MAPK3/IL6/STAT3/TNF/PTGS2/SRC/IL10/MAPK14/CREB1/CASP8/IL2/STAT1/JAK2/IL1B/EP300/HIF1A/TGFB1/SERPINE1/IFNG	19
BP	GO:0071222	cellular response to lipopolysaccharide	15/50	205/18670	3.89208e-18	4.16954e-16	1.09163e-16	MAPK3/IL6/TNF/MAPK1/MAPK8/SRC/CXCL8/AKT1/IL10/MAPK14/CCL2/IL1B/ICAM1/TGFB1/SERPINE1	15
BP	GO:0071219	cellular response to molecule of bacterial origin	15/50	212/18670	6.47468e-18	6.34939e-16	1.66234e-16	MAPK3/IL6/TNF/MAPK1/MAPK8/SRC/CXCL8/AKT1/IL10/MAPK14/CCL2/IL1B/ICAM1/TGFB1/SERPINE1	15
BP	GO:0071214	cellular response to abiotic stimulus	17/50	331/18670	6.50043e-18	6.34939e-16	1.66234e-16	MAPK3/TP53/PTGS2/CASP3/MAPK8/MYC/EGFR/BCL2L1/PTEN/AKT1/MAPK14/CASP9/CASP8/CDKN1A/IL1B/EP300/TGFB1	17
BP	GO:0104004	cellular response to environmental stimulus	17/50	331/18670	6.50043e-18	6.34939e-16	1.66234e-16	MAPK3/TP53/PTGS2/CASP3/MAPK8/MYC/EGFR/BCL2L1/PTEN/AKT1/MAPK14/CASP9/CASP8/CDKN1A/IL1B/EP300/TGFB1	17
BP	GO:0070997	neuron death	17/50	348/18670	1.51075e-17	1.43349e-15	3.75303e-16	TP53/JUN/STAT3/TNF/CASP3/BCL2L1/MTOR/AKT1/IL10/CASP9/FOS/CREB1/CASP8/CCL2/JAK2/HIF1A/IFNG	17
BP	GO:0042063	gliogenesis	16/50	290/18670	2.32586e-17	2.1456e-15	5.61742e-16	MAPK3/IL6/STAT3/TNF/MAPK1/EGFR/MTOR/PTEN/MAP2K1/AKT1/CREB1/CCL2/ERBB2/IL1B/TGFB1/IFNG	16
BP	GO:0048661	positive regulation of smooth muscle cell proliferation	12/50	101/18670	3.27941e-17	2.94349e-15	7.70637e-16	IL6/JUN/TNF/PTGS2/MMP9/EGFR/MTOR/AKT1/IL10/MMP2/STAT1/JAK2	12
BP	GO:0050678	regulation of epithelial cell proliferation	17/50	378/18670	6.04597e-17	5.28386e-15	1.38337e-15	VEGFA/JUN/STAT3/TNF/MYC/EGFR/MTOR/CCND1/PTEN/AKT1/IL10/CCL2/ERBB2/STAT1/HIF1A/TGFB1/AR	17
BP	GO:0009416	response to light stimulus	16/50	314/18670	8.226e-17	7.00476e-15	1.83392e-15	TP53/PTGS2/CASP3/MAPK8/MYC/EGFR/MTOR/CCND1/AKT1/CAT/CASP9/FOS/CREB1/CDKN1A/EP300/HIF1A	16
BP	GO:0070482	response to oxygen levels	17/50	394/18670	1.20852e-16	1.00338e-14	2.62695e-15	VEGFA/TP53/PTGS2/CASP3/MYC/SRC/MTOR/PTEN/AKT1/MMP2/CAT/CREB1/CDKN1A/ICAM1/EP300/HIF1A/TGFB1	17
BP	GO:0051091	positive regulation of DNA-binding transcription factor activity	15/50	261/18670	1.47943e-16	1.19834e-14	3.13739e-15	VEGFA/IL6/STAT3/TNF/PTEN/AKT1/IL10/CAT/ESR1/JAK2/IL1B/ICAM1/EP300/TGFB1/AR	15
BP	GO:0071902	positive regulation of protein serine/threonine kinase activity	16/50	334/18670	2.18477e-16	1.72753e-14	4.52286e-15	VEGFA/MAPK3/TNF/MAPK1/EGFR/EGF/SRC/CCND1/MAP2K1/AKT1/MAPK14/ERBB2/JAK2/IL1B/TGFB1/IFNG	16
BP	GO:0031960	response to corticosteroid	13/50	162/18670	2.60831e-16	2.01446e-14	5.27408e-15	IL6/TNF/PTGS2/CASP3/EGFR/SRC/CCND1/IL10/CASP9/FOS/CDKN1A/ICAM1/TGFB1	13
BP	GO:0051222	positive regulation of protein transport	17/50	418/18670	3.23535e-16	2.44196e-14	6.3933e-15	MAPK3/IL6/TP53/TNF/PTGS2/MAPK1/EGFR/SRC/IL10/MAPK14/IL2/ERBB2/JAK2/IL1B/HIF1A/TGFB1/IFNG	17
BP	GO:0010001	glial cell differentiation	14/50	218/18670	3.72456e-16	2.74872e-14	7.19646e-15	MAPK3/IL6/STAT3/TNF/MAPK1/EGFR/MTOR/PTEN/MAP2K1/AKT1/ERBB2/IL1B/TGFB1/IFNG	14
BP	GO:0034614	cellular response to reactive oxygen species	13/50	168/18670	4.21425e-16	3.0425e-14	7.9656e-15	MAPK3/IL6/JUN/TNF/MAPK1/MAPK8/MMP9/EGFR/SRC/AKT1/IL10/MMP2/FOS	13
BP	GO:0045639	positive regulation of myeloid cell differentiation	11/50	91/18670	6.31756e-16	4.46396e-14	1.16871e-14	JUN/STAT3/TNF/MAPK14/FOS/CREB1/CASP8/STAT1/HIF1A/TGFB1/IFNG	11
BP	GO:0001666	response to hypoxia	16/50	359/18670	6.81172e-16	4.71286e-14	1.23388e-14	VEGFA/TP53/PTGS2/CASP3/MYC/SRC/MTOR/PTEN/AKT1/MMP2/CAT/CREB1/ICAM1/EP300/HIF1A/TGFB1	16
BP	GO:0032355	response to estradiol	12/50	134/18670	1.08903e-15	7.26747e-14	1.9027e-14	STAT3/PTGS2/CASP3/EGFR/CCND1/PTEN/IL10/CAT/CASP9/ESR1/CASP8/TGFB1	12
BP	GO:0036293	response to decreased oxygen levels	16/50	370/18670	1.09417e-15	7.26747e-14	1.9027e-14	VEGFA/TP53/PTGS2/CASP3/MYC/SRC/MTOR/PTEN/AKT1/MMP2/CAT/CREB1/ICAM1/EP300/HIF1A/TGFB1	16
BP	GO:0018105	peptidyl-serine phosphorylation	15/50	299/18670	1.11988e-15	7.2924e-14	1.90923e-14	VEGFA/MAPK3/IL6/TNF/PTGS2/MAPK1/MAPK8/EGFR/SRC/MTOR/AKT1/MAPK14/HSP90AA1/TGFB1/IFNG	15
BP	GO:0045428	regulation of nitric oxide biosynthetic process	10/50	66/18670	1.37339e-15	8.77118e-14	2.29639e-14	TNF/PTGS2/MTOR/AKT1/IL10/HSP90AA1/JAK2/IL1B/ICAM1/IFNG	10
BP	GO:0045429	positive regulation of nitric oxide biosynthetic process	9/50	43/18670	1.74246e-15	1.09183e-13	2.85853e-14	TNF/PTGS2/MTOR/AKT1/HSP90AA1/JAK2/IL1B/ICAM1/IFNG	9
BP	GO:0009411	response to UV	12/50	141/18670	2.03197e-15	1.24966e-13	3.27174e-14	TP53/PTGS2/CASP3/MAPK8/MYC/EGFR/CCND1/AKT1/CAT/CASP9/CDKN1A/EP300	12
BP	GO:1903426	regulation of reactive oxygen species biosynthetic process	11/50	101/18670	2.0813e-15	1.25673e-13	3.29025e-14	STAT3/TNF/PTGS2/MTOR/AKT1/IL10/HSP90AA1/JAK2/IL1B/ICAM1/IFNG	11
BP	GO:1904407	positive regulation of nitric oxide metabolic process	9/50	44/18670	2.18619e-15	1.29649e-13	3.39434e-14	TNF/PTGS2/MTOR/AKT1/HSP90AA1/JAK2/IL1B/ICAM1/IFNG	9
BP	GO:0030879	mammary gland development	12/50	143/18670	2.4137e-15	1.36814e-13	3.58195e-14	VEGFA/MAPK1/EGF/SRC/CCND1/AKT1/ESR1/CREB1/JAK2/HIF1A/TGFB1/AR	12
BP	GO:0007565	female pregnancy	13/50	192/18670	2.43061e-15	1.36814e-13	3.58195e-14	MAPK3/PTGS2/MAPK1/MMP9/MTOR/AKT1/MMP2/FOS/ESR1/IL1B/TGFB1/SPP1/AR	13
BP	GO:0050731	positive regulation of peptidyl-tyrosine phosphorylation	13/50	192/18670	2.43061e-15	1.36814e-13	3.58195e-14	VEGFA/IL6/TP53/STAT3/TNF/EGF/SRC/MTOR/IL2/JAK2/ICAM1/TGFB1/IFNG	13
BP	GO:0070371	ERK1 and ERK2 cascade	15/50	317/18670	2.6607e-15	1.45471e-13	3.80858e-14	MAPK3/JUN/TNF/MAPK1/MYC/EGFR/EGF/SRC/PTEN/MAP2K1/CCL2/ERBB2/IL1B/ICAM1/TGFB1	15
BP	GO:0045637	regulation of myeloid cell differentiation	14/50	251/18670	2.672e-15	1.45471e-13	3.80858e-14	JUN/STAT3/TNF/MYC/MTOR/MAPK14/FOS/CREB1/CASP8/STAT1/EP300/HIF1A/TGFB1/IFNG	14
BP	GO:0051384	response to glucocorticoid	12/50	146/18670	3.11009e-15	1.6659e-13	4.36151e-14	IL6/TNF/PTGS2/CASP3/EGFR/CCND1/IL10/CASP9/FOS/CDKN1A/ICAM1/TGFB1	12
BP	GO:0018209	peptidyl-serine modification	15/50	322/18670	3.35255e-15	1.76727e-13	4.62691e-14	VEGFA/MAPK3/IL6/TNF/PTGS2/MAPK1/MAPK8/EGFR/SRC/MTOR/AKT1/MAPK14/HSP90AA1/TGFB1/IFNG	15
BP	GO:0050730	regulation of peptidyl-tyrosine phosphorylation	14/50	256/18670	3.51559e-15	1.82426e-13	4.77612e-14	VEGFA/IL6/TP53/STAT3/TNF/EGFR/EGF/SRC/MTOR/IL2/JAK2/ICAM1/TGFB1/IFNG	14
BP	GO:1903829	positive regulation of cellular protein localization	15/50	324/18670	3.67336e-15	1.87681e-13	4.91368e-14	TP53/TNF/PTGS2/MAPK1/MAPK8/EGFR/EGF/SRC/AKT1/MAPK14/CASP8/ERBB2/IL1B/TGFB1/IFNG	15
BP	GO:0022407	regulation of cell-cell adhesion	16/50	403/18670	4.16459e-15	2.09555e-13	5.48637e-14	VEGFA/IL6/TNF/CASP3/SRC/AKT1/IL10/MAPK14/IL2/CCL2/ERBB2/JAK2/IL1B/ICAM1/TGFB1/IFNG	16
BP	GO:2001233	regulation of apoptotic signaling pathway	16/50	406/18670	4.67534e-15	2.31743e-13	6.06729e-14	TP53/TNF/PTGS2/MAPK8/MMP9/SRC/BCL2L1/PTEN/AKT1/CASP8/JAK2/IL1B/ICAM1/HIF1A/SERPINE1/AR	16
BP	GO:0002573	myeloid leukocyte differentiation	13/50	204/18670	5.35982e-15	2.61764e-13	6.85327e-14	VEGFA/JUN/TNF/MMP9/MYC/SRC/MTOR/MAPK14/FOS/CREB1/CASP8/TGFB1/IFNG	13
BP	GO:0050679	positive regulation of epithelial cell proliferation	13/50	206/18670	6.08555e-15	2.929e-13	7.66844e-14	VEGFA/JUN/STAT3/MYC/EGFR/MTOR/CCND1/AKT1/IL10/ERBB2/HIF1A/TGFB1/AR	13
BP	GO:0006809	nitric oxide biosynthetic process	10/50	77/18670	6.98903e-15	3.27057e-13	8.56271e-14	TNF/PTGS2/MTOR/AKT1/IL10/HSP90AA1/JAK2/IL1B/ICAM1/IFNG	10
BP	GO:0043491	protein kinase B signaling	14/50	269/18670	6.99219e-15	3.27057e-13	8.56271e-14	TNF/EGFR/EGF/SRC/MTOR/PTEN/AKT1/ESR1/HSP90AA1/CCL2/ERBB2/IL1B/IGF1R/TGFB1	14
BP	GO:0071496	cellular response to external stimulus	15/50	339/18670	7.15604e-15	3.30072e-13	8.64165e-14	MAPK3/TP53/JUN/PTGS2/MAPK1/MAPK8/EGFR/MTOR/AKT1/FOS/CASP8/CDKN1A/IL1B/ICAM1/TGFB1	15
BP	GO:0009612	response to mechanical stimulus	13/50	210/18670	7.81471e-15	3.55516e-13	9.30779e-14	MAPK3/JUN/PTGS2/MAPK8/EGFR/SRC/AKT1/MAPK14/FOS/CASP8/STAT1/IL1B/TGFB1	13
BP	GO:0046209	nitric oxide metabolic process	10/50	82/18670	1.34969e-14	6.0572e-13	1.58584e-13	TNF/PTGS2/MTOR/AKT1/IL10/HSP90AA1/JAK2/IL1B/ICAM1/IFNG	10
BP	GO:0044706	multi-multicellular organism process	13/50	222/18670	1.60708e-14	7.11615e-13	1.86308e-13	MAPK3/PTGS2/MAPK1/MMP9/MTOR/AKT1/MMP2/FOS/ESR1/IL1B/TGFB1/SPP1/AR	13
BP	GO:1903409	reactive oxygen species biosynthetic process	11/50	122/18670	1.76478e-14	7.71163e-13	2.01899e-13	STAT3/TNF/PTGS2/MTOR/AKT1/IL10/HSP90AA1/JAK2/IL1B/ICAM1/IFNG	11
BP	GO:2001057	reactive nitrogen species metabolic process	10/50	85/18670	1.96267e-14	8.46498e-13	2.21622e-13	TNF/PTGS2/MTOR/AKT1/IL10/HSP90AA1/JAK2/IL1B/ICAM1/IFNG	10
BP	GO:0035690	cellular response to drug	15/50	369/18670	2.48336e-14	1.05734e-12	2.76823e-13	MAPK3/IL6/TP53/TNF/PTGS2/MAPK1/MYC/EGFR/SRC/PTEN/IL10/CASP9/IL1B/ICAM1/TGFB1	15
BP	GO:1903428	positive regulation of reactive oxygen species biosynthetic process	9/50	57/18670	2.70375e-14	1.1366e-12	2.97575e-13	TNF/PTGS2/MTOR/AKT1/HSP90AA1/JAK2/IL1B/ICAM1/IFNG	9
BP	GO:0042110	T cell activation	16/50	464/18670	3.71584e-14	1.54254e-12	4.03853e-13	IL6/TP53/STAT3/CASP3/SRC/MTOR/AKT1/IL10/CASP8/IL2/CCL2/ERBB2/IL1B/ICAM1/TGFB1/IFNG	16
BP	GO:1903706	regulation of hemopoiesis	16/50	475/18670	5.33528e-14	2.16669e-12	5.67264e-13	JUN/STAT3/TNF/MYC/MTOR/MAPK14/FOS/CREB1/CASP8/IL2/ERBB2/STAT1/EP300/HIF1A/TGFB1/IFNG	16
BP	GO:0071276	cellular response to cadmium ion	8/50	37/18670	5.34986e-14	2.16669e-12	5.67264e-13	MAPK3/JUN/MAPK1/MAPK8/MMP9/EGFR/AKT1/FOS	8
BP	GO:1903708	positive regulation of hemopoiesis	12/50	185/18670	5.4699e-14	2.18862e-12	5.73004e-13	JUN/STAT3/TNF/MAPK14/FOS/CREB1/CASP8/IL2/STAT1/HIF1A/TGFB1/IFNG	12
BP	GO:0046686	response to cadmium ion	9/50	63/18670	7.02888e-14	2.77892e-12	7.2755e-13	MAPK3/JUN/MAPK1/MAPK8/MMP9/EGFR/AKT1/CAT/FOS	9
BP	GO:1903532	positive regulation of secretion by cell	15/50	399/18670	7.77075e-14	3.03608e-12	7.94878e-13	MAPK3/IL6/TNF/EGFR/SRC/IL10/MAPK14/CREB1/IL2/JAK2/IL1B/HIF1A/TGFB1/SPP1/IFNG	15
BP	GO:1901654	response to ketone	12/50	193/18670	9.09326e-14	3.51148e-12	9.19343e-13	EGFR/SRC/BCL2L1/CCND1/AKT1/CASP9/FOS/CDKN1A/ICAM1/TGFB1/SPP1/AR	12
BP	GO:0043406	positive regulation of MAP kinase activity	13/50	258/18670	1.11555e-13	4.25831e-12	1.11487e-12	VEGFA/MAPK3/TNF/MAPK1/EGFR/EGF/SRC/MAP2K1/MAPK14/ERBB2/JAK2/IL1B/TGFB1	13
BP	GO:0014065	phosphatidylinositol 3-kinase signaling	11/50	148/18670	1.52816e-13	5.76707e-12	1.50988e-12	MAPK3/TNF/MAPK1/EGFR/SRC/PTEN/AKT1/CAT/ERBB2/JAK2/IGF1R	11
BP	GO:0043405	regulation of MAP kinase activity	14/50	337/18670	1.55447e-13	5.80043e-12	1.51862e-12	VEGFA/MAPK3/TNF/MAPK1/EGFR/EGF/SRC/MAP2K1/MAPK14/ERBB2/JAK2/IL1B/IGF1R/TGFB1	14
BP	GO:0031334	positive regulation of protein complex assembly	13/50	268/18670	1.81617e-13	6.62804e-12	1.73529e-12	VEGFA/TP53/JUN/TNF/SRC/MTOR/ESR1/CREB1/HSP90AA1/ICAM1/TGFB1/MMP1/IFNG	13
BP	GO:0050714	positive regulation of protein secretion	13/50	268/18670	1.81617e-13	6.62804e-12	1.73529e-12	MAPK3/IL6/TNF/EGFR/SRC/IL10/MAPK14/IL2/JAK2/IL1B/HIF1A/TGFB1/IFNG	13
BP	GO:0042136	neurotransmitter biosynthetic process	10/50	106/18670	1.91751e-13	6.92179e-12	1.8122e-12	TNF/PTGS2/MTOR/AKT1/IL10/HSP90AA1/JAK2/IL1B/ICAM1/IFNG	10
BP	GO:0001890	placenta development	11/50	152/18670	2.05437e-13	7.33607e-12	1.92066e-12	MAPK3/PTGS2/MAPK1/EGFR/MAP2K1/AKT1/IL10/MAPK14/CASP8/HIF1A/SPP1	11
BP	GO:0051047	positive regulation of secretion	15/50	428/18670	2.15227e-13	7.60392e-12	1.99079e-12	MAPK3/IL6/TNF/EGFR/SRC/IL10/MAPK14/CREB1/IL2/JAK2/IL1B/HIF1A/TGFB1/SPP1/IFNG	15
BP	GO:0061180	mammary gland epithelium development	9/50	72/18670	2.483e-13	8.68004e-12	2.27253e-12	MAPK1/SRC/CCND1/AKT1/ESR1/JAK2/HIF1A/TGFB1/AR	9
BP	GO:0043434	response to peptide hormone	15/50	436/18670	2.8139e-13	9.73433e-12	2.54855e-12	STAT3/PTGS2/SRC/MTOR/PTEN/AKT1/IL10/CAT/CREB1/STAT1/JAK2/IL1B/IGF1R/ICAM1/TGFB1	15
BP	GO:0150076	neuroinflammatory response	9/50	75/18670	3.64227e-13	1.24701e-11	3.2648e-12	IL6/JUN/TNF/PTGS2/MMP9/EGFR/JAK2/IL1B/IFNG	9
BP	GO:0045862	positive regulation of proteolysis	14/50	363/18670	4.2799e-13	1.45036e-11	3.7972e-12	MAPK3/STAT3/TNF/MYC/EGF/SRC/PTEN/AKT1/MAPK14/CASP9/CASP8/JAK2/IL1B/IFNG	14
BP	GO:0002793	positive regulation of peptide secretion	13/50	288/18670	4.55382e-13	1.5276e-11	3.99942e-12	MAPK3/IL6/TNF/EGFR/SRC/IL10/MAPK14/IL2/JAK2/IL1B/HIF1A/TGFB1/IFNG	13
BP	GO:0097193	intrinsic apoptotic signaling pathway	13/50	289/18670	4.75943e-13	1.58061e-11	4.1382e-12	TP53/TNF/PTGS2/CASP3/MMP9/SRC/BCL2L1/AKT1/CASP9/CDKN1A/JAK2/EP300/HIF1A	13
BP	GO:2001234	negative regulation of apoptotic signaling pathway	12/50	230/18670	7.36374e-13	2.42128e-11	6.33918e-12	TNF/PTGS2/MMP9/SRC/BCL2L1/AKT1/CASP8/IL1B/ICAM1/HIF1A/SERPINE1/AR	12
BP	GO:0048708	astrocyte differentiation	9/50	81/18670	7.47624e-13	2.43418e-11	6.37293e-12	MAPK3/IL6/STAT3/TNF/MAPK1/EGFR/MAP2K1/IL1B/IFNG	9
BP	GO:0097305	response to alcohol	12/50	233/18670	8.58663e-13	2.76856e-11	7.2484e-12	STAT3/BCL2L1/CCND1/PTEN/AKT1/CAT/FOS/CASP8/IL2/CDKN1A/ICAM1/TGFB1	12
BP	GO:1903037	regulation of leukocyte cell-cell adhesion	13/50	304/18670	9.05829e-13	2.89255e-11	7.57302e-12	IL6/TNF/CASP3/SRC/AKT1/IL10/IL2/CCL2/ERBB2/IL1B/ICAM1/TGFB1/IFNG	13
BP	GO:0034612	response to tumor necrosis factor	13/50	312/18670	1.25938e-12	3.98323e-11	1.04285e-11	MAPK3/TNF/PTGS2/MAPK1/CASP3/CXCL8/AKT1/MAPK14/CASP8/CCL2/STAT1/JAK2/ICAM1	13
BP	GO:0048015	phosphatidylinositol-mediated signaling	11/50	181/18670	1.40888e-12	4.41403e-11	1.15564e-11	MAPK3/TNF/MAPK1/EGFR/SRC/PTEN/AKT1/CAT/ERBB2/JAK2/IGF1R	11
BP	GO:0051896	regulation of protein kinase B signaling	12/50	244/18670	1.48215e-12	4.60021e-11	1.20439e-11	TNF/EGFR/EGF/SRC/MTOR/PTEN/AKT1/ESR1/HSP90AA1/ERBB2/IGF1R/TGFB1	12
BP	GO:1902895	positive regulation of pri-miRNA transcription by RNA polymerase II	7/50	31/18670	1.59681e-12	4.9102e-11	1.28554e-11	TP53/JUN/STAT3/IL10/FOS/HIF1A/TGFB1	7
BP	GO:0048017	inositol lipid-mediated signaling	11/50	184/18670	1.68705e-12	5.14009e-11	1.34573e-11	MAPK3/TNF/MAPK1/EGFR/SRC/PTEN/AKT1/CAT/ERBB2/JAK2/IGF1R	11
BP	GO:0045785	positive regulation of cell adhesion	14/50	403/18670	1.76309e-12	5.32293e-11	1.3936e-11	VEGFA/IL6/TNF/SRC/AKT1/IL10/IL2/CCL2/ERBB2/JAK2/IL1B/ICAM1/TGFB1/IFNG	14
BP	GO:0032103	positive regulation of response to external stimulus	13/50	323/18670	1.95282e-12	5.82011e-11	1.52377e-11	VEGFA/MAPK3/IL6/TNF/PTGS2/EGFR/CXCL8/MAPK14/IL2/JAK2/IL1B/TGFB1/SERPINE1	13
BP	GO:0050900	leukocyte migration	15/50	499/18670	1.96282e-12	5.82011e-11	1.52377e-11	VEGFA/MAPK3/IL6/TNF/SRC/CXCL8/AKT1/IL10/MAPK14/CCL2/IL1B/ICAM1/TGFB1/MMP1/SERPINE1	15
BP	GO:1905475	regulation of protein localization to membrane	11/50	187/18670	2.01391e-12	5.91876e-11	1.5496e-11	TP53/TNF/MAPK8/EGFR/BCL2L1/AKT1/CASP8/ERBB2/TGFB1/IFNG/AR	11
BP	GO:0031663	lipopolysaccharide-mediated signaling pathway	8/50	58/18670	2.5466e-12	7.41866e-11	1.94229e-11	MAPK3/TNF/MAPK1/AKT1/MAPK14/CCL2/IL1B/TGFB1	8
BP	GO:0032147	activation of protein kinase activity	13/50	333/18670	2.87031e-12	8.28896e-11	2.17014e-11	VEGFA/MAPK3/TNF/MAPK1/EGFR/EGF/SRC/MTOR/MAP2K1/AKT1/MAPK14/JAK2/IL1B	13
BP	GO:1901216	positive regulation of neuron death	9/50	94/18670	2.97057e-12	8.50453e-11	2.22658e-11	TP53/JUN/TNF/CASP3/MTOR/CASP9/FOS/CASP8/IFNG	9
BP	GO:0007159	leukocyte cell-cell adhesion	13/50	337/18670	3.33685e-12	9.47153e-11	2.47975e-11	IL6/TNF/CASP3/SRC/AKT1/IL10/IL2/CCL2/ERBB2/IL1B/ICAM1/TGFB1/IFNG	13
BP	GO:0002685	regulation of leukocyte migration	11/50	196/18670	3.36623e-12	9.47394e-11	2.48038e-11	VEGFA/MAPK3/IL6/TNF/CXCL8/AKT1/MAPK14/CCL2/ICAM1/TGFB1/SERPINE1	11
BP	GO:0051052	regulation of DNA metabolic process	14/50	429/18670	4.09053e-12	1.14157e-10	2.98874e-11	MAPK3/IL6/TP53/JUN/MAPK1/MYC/EGFR/SRC/AKT1/IL10/IL2/HSP90AA1/CDKN1A/TGFB1	14
BP	GO:0001101	response to acid chemical	13/50	343/18670	4.16781e-12	1.15344e-10	3.01983e-11	VEGFA/TNF/PTGS2/CASP3/EGFR/SRC/BCL2L1/MTOR/AKT1/MMP2/CAT/CREB1/ICAM1	13
BP	GO:0060749	mammary gland alveolus development	6/50	18/18670	4.89878e-12	1.33351e-10	3.49128e-11	VEGFA/EGF/CCND1/ESR1/HIF1A/AR	6
BP	GO:0061377	mammary gland lobule development	6/50	18/18670	4.89878e-12	1.33351e-10	3.49128e-11	VEGFA/EGF/CCND1/ESR1/HIF1A/AR	6
BP	GO:0060135	maternal process involved in female pregnancy	8/50	64/18670	5.81017e-12	1.56874e-10	4.10714e-11	MAPK3/PTGS2/MAPK1/MTOR/AKT1/ESR1/SPP1/AR	8
BP	GO:0071456	cellular response to hypoxia	11/50	207/18670	6.10221e-12	1.63431e-10	4.2788e-11	VEGFA/TP53/PTGS2/MYC/SRC/MTOR/PTEN/AKT1/ICAM1/EP300/HIF1A	11
BP	GO:0071887	leukocyte apoptotic process	9/50	104/18670	7.5222e-12	1.98264e-10	5.19076e-11	IL6/TP53/CASP3/PTEN/AKT1/IL10/CASP9/IL2/HIF1A	9
BP	GO:2001237	negative regulation of extrinsic apoptotic signaling pathway	9/50	104/18670	7.5222e-12	1.98264e-10	5.19076e-11	TNF/SRC/BCL2L1/AKT1/CASP8/IL1B/ICAM1/SERPINE1/AR	9
BP	GO:0042133	neurotransmitter metabolic process	10/50	153/18670	7.87586e-12	2.05951e-10	5.39201e-11	TNF/PTGS2/MTOR/AKT1/IL10/HSP90AA1/JAK2/IL1B/ICAM1/IFNG	10
BP	GO:0033138	positive regulation of peptidyl-serine phosphorylation	9/50	105/18670	8.21109e-12	2.12055e-10	5.55183e-11	VEGFA/IL6/TNF/PTGS2/EGFR/AKT1/HSP90AA1/TGFB1/IFNG	9
BP	GO:0052547	regulation of peptidase activity	14/50	452/18670	8.237e-12	2.12055e-10	5.55183e-11	VEGFA/MAPK3/STAT3/TNF/PTGS2/MMP9/MYC/SRC/AKT1/MAPK14/CASP9/CASP8/JAK2/SERPINE1	14
BP	GO:2001236	regulation of extrinsic apoptotic signaling pathway	10/50	155/18670	8.96846e-12	2.2911e-10	5.99834e-11	TNF/SRC/BCL2L1/PTEN/AKT1/CASP8/IL1B/ICAM1/SERPINE1/AR	10
BP	GO:0007259	JAK-STAT cascade	10/50	156/18670	9.56397e-12	2.41221e-10	6.31543e-11	IL6/STAT3/TNF/EGF/IL10/IL2/CCL2/STAT1/JAK2/IFNG	10
BP	GO:0051403	stress-activated MAPK cascade	12/50	286/18670	9.58783e-12	2.41221e-10	6.31543e-11	VEGFA/MAPK3/TNF/MAPK1/MAPK8/MYC/EGFR/MAP2K1/AKT1/MAPK14/IL1B/IGF1R	12
BP	GO:0036294	cellular response to decreased oxygen levels	11/50	217/18670	1.01855e-11	2.54331e-10	6.65866e-11	VEGFA/TP53/PTGS2/MYC/SRC/MTOR/PTEN/AKT1/ICAM1/EP300/HIF1A	11
BP	GO:0007584	response to nutrient	11/50	219/18670	1.12505e-11	2.78827e-10	7.29999e-11	PTGS2/EGFR/MTOR/CCND1/PTEN/CAT/CREB1/STAT1/IL1B/TGFB1/SPP1	11
BP	GO:0043254	regulation of protein complex assembly	14/50	467/18670	1.27399e-11	3.13402e-10	8.20521e-11	VEGFA/TP53/JUN/TNF/SRC/MTOR/ESR1/CREB1/HSP90AA1/ICAM1/EP300/TGFB1/MMP1/IFNG	14
BP	GO:1902893	regulation of pri-miRNA transcription by RNA polymerase II	7/50	41/18670	1.33793e-11	3.26711e-10	8.55365e-11	TP53/JUN/STAT3/IL10/FOS/HIF1A/TGFB1	7
BP	GO:1904019	epithelial cell apoptotic process	9/50	111/18670	1.36436e-11	3.30733e-10	8.65896e-11	IL6/TNF/BCL2L1/MTOR/IL10/CCL2/JAK2/ICAM1/SERPINE1	9
BP	GO:0048511	rhythmic process	12/50	295/18670	1.37689e-11	3.31351e-10	8.67514e-11	TP53/JUN/CASP3/MAPK8/EGFR/SRC/MTOR/PTEN/ESR1/CREB1/EP300/SERPINE1	12
BP	GO:0050890	cognition	12/50	296/18670	1.43234e-11	3.42216e-10	8.95959e-11	JUN/TNF/PTGS2/MAPK1/CASP3/EGFR/MTOR/PTEN/FOS/CREB1/EP300/HIF1A	12
BP	GO:0070372	regulation of ERK1 and ERK2 cascade	12/50	300/18670	1.67503e-11	3.9734e-10	1.04028e-10	MAPK3/JUN/TNF/EGFR/SRC/PTEN/MAP2K1/CCL2/ERBB2/IL1B/ICAM1/TGFB1	12
BP	GO:0051054	positive regulation of DNA metabolic process	11/50	228/18670	1.73965e-11	4.09742e-10	1.07275e-10	MAPK3/IL6/JUN/MAPK1/MYC/EGFR/SRC/AKT1/IL2/HSP90AA1/TGFB1	11
BP	GO:0097696	STAT cascade	10/50	166/18670	1.77753e-11	4.15718e-10	1.08839e-10	IL6/STAT3/TNF/EGF/IL10/IL2/CCL2/STAT1/JAK2/IFNG	10
BP	GO:0002761	regulation of myeloid leukocyte differentiation	9/50	117/18670	2.20357e-11	5.11752e-10	1.33982e-10	JUN/TNF/MYC/MTOR/FOS/CREB1/CASP8/TGFB1/IFNG	9
BP	GO:0071453	cellular response to oxygen levels	11/50	234/18670	2.30296e-11	5.3112e-10	1.39053e-10	VEGFA/TP53/PTGS2/MYC/SRC/MTOR/PTEN/AKT1/ICAM1/EP300/HIF1A	11
BP	GO:0010634	positive regulation of epithelial cell migration	10/50	171/18670	2.38791e-11	5.46914e-10	1.43188e-10	VEGFA/JUN/PTGS2/MMP9/SRC/MTOR/AKT1/HIF1A/TGFB1/IFNG	10
BP	GO:0001503	ossification	13/50	398/18670	2.6845e-11	6.10631e-10	1.5987e-10	MAPK3/IL6/TNF/PTGS2/MAPK1/EGFR/AKT1/MMP2/MAPK14/CAT/HIF1A/TGFB1/SPP1	13
BP	GO:0031098	stress-activated protein kinase signaling cascade	12/50	315/18670	2.95503e-11	6.67596e-10	1.74784e-10	VEGFA/MAPK3/TNF/MAPK1/MAPK8/MYC/EGFR/MAP2K1/AKT1/MAPK14/IL1B/IGF1R	12
BP	GO:0001936	regulation of endothelial cell proliferation	10/50	176/18670	3.17904e-11	7.08563e-10	1.85509e-10	VEGFA/JUN/STAT3/TNF/MTOR/AKT1/IL10/CCL2/STAT1/HIF1A	10
BP	GO:0051897	positive regulation of protein kinase B signaling	10/50	176/18670	3.17904e-11	7.08563e-10	1.85509e-10	TNF/EGFR/EGF/SRC/MTOR/ESR1/HSP90AA1/ERBB2/IGF1R/TGFB1	10
BP	GO:1905477	positive regulation of protein localization to membrane	9/50	122/18670	3.22205e-11	7.13361e-10	1.86766e-10	TP53/TNF/MAPK8/EGFR/AKT1/CASP8/ERBB2/TGFB1/IFNG	9
BP	GO:0071260	cellular response to mechanical stimulus	8/50	79/18670	3.32316e-11	7.30874e-10	1.91351e-10	MAPK3/PTGS2/MAPK8/EGFR/AKT1/CASP8/IL1B/TGFB1	8
BP	GO:0061614	pri-miRNA transcription by RNA polymerase II	7/50	47/18670	3.69769e-11	8.07897e-10	2.11516e-10	TP53/JUN/STAT3/IL10/FOS/HIF1A/TGFB1	7
BP	GO:0014066	regulation of phosphatidylinositol 3-kinase signaling	9/50	124/18670	3.73363e-11	8.10417e-10	2.12176e-10	MAPK3/TNF/MAPK1/EGFR/SRC/PTEN/CAT/JAK2/IGF1R	9
BP	GO:0048872	homeostasis of number of cells	11/50	246/18670	3.94685e-11	8.51136e-10	2.22837e-10	VEGFA/IL6/STAT3/CASP3/AKT1/MAPK14/IL2/STAT1/JAK2/HIF1A/TGFB1	11
BP	GO:0002687	positive regulation of leukocyte migration	9/50	128/18670	4.97626e-11	1.06103e-09	2.7779e-10	VEGFA/MAPK3/IL6/TNF/CXCL8/MAPK14/ICAM1/TGFB1/SERPINE1	9
BP	GO:0048145	regulation of fibroblast proliferation	8/50	83/18670	4.98408e-11	1.06103e-09	2.7779e-10	TP53/JUN/MYC/EGFR/ESR1/CREB1/CDKN1A/TGFB1	8
BP	GO:0048144	fibroblast proliferation	8/50	84/18670	5.49768e-11	1.16292e-09	3.04464e-10	TP53/JUN/MYC/EGFR/ESR1/CREB1/CDKN1A/TGFB1	8
BP	GO:0022409	positive regulation of cell-cell adhesion	11/50	255/18670	5.80594e-11	1.22035e-09	3.19501e-10	IL6/TNF/SRC/AKT1/IL10/IL2/CCL2/IL1B/ICAM1/TGFB1/IFNG	11
BP	GO:0007611	learning or memory	11/50	256/18670	6.05489e-11	1.24934e-09	3.2709e-10	JUN/PTGS2/MAPK1/CASP3/EGFR/MTOR/PTEN/FOS/CREB1/EP300/HIF1A	11
BP	GO:1904705	regulation of vascular smooth muscle cell proliferation	8/50	85/18670	6.05671e-11	1.24934e-09	3.2709e-10	JUN/TNF/MMP9/PTEN/IL10/MMP2/CDKN1A/JAK2	8
BP	GO:1990874	vascular smooth muscle cell proliferation	8/50	85/18670	6.05671e-11	1.24934e-09	3.2709e-10	JUN/TNF/MMP9/PTEN/IL10/MMP2/CDKN1A/JAK2	8
BP	GO:0048568	embryonic organ development	13/50	428/18670	6.61967e-11	1.35703e-09	3.55286e-10	VEGFA/MAPK3/TP53/TNF/MAPK1/EGFR/CXCL8/MAP2K1/AKT1/IL10/CASP8/HIF1A/TGFB1	13
BP	GO:0071248	cellular response to metal ion	10/50	190/18670	6.7804e-11	1.38146e-09	3.6168e-10	MAPK3/JUN/PTGS2/MAPK1/MAPK8/MMP9/EGFR/AKT1/FOS/CREB1	10
BP	GO:0001935	endothelial cell proliferation	10/50	191/18670	7.14099e-11	1.44605e-09	3.78591e-10	VEGFA/JUN/STAT3/TNF/MTOR/AKT1/IL10/CCL2/STAT1/HIF1A	10
BP	GO:0031099	regeneration	10/50	198/18670	1.01824e-10	2.04944e-09	5.36566e-10	JUN/EGFR/CCND1/PTEN/MAP2K1/IL10/CDKN1A/JAK2/TGFB1/SPP1	10
BP	GO:0002763	positive regulation of myeloid leukocyte differentiation	7/50	54/18670	1.02664e-10	2.05391e-09	5.37735e-10	JUN/TNF/FOS/CREB1/CASP8/TGFB1/IFNG	7
BP	GO:0033135	regulation of peptidyl-serine phosphorylation	9/50	139/18670	1.04654e-10	2.08117e-09	5.44873e-10	VEGFA/IL6/TNF/PTGS2/EGFR/AKT1/HSP90AA1/TGFB1/IFNG	9
BP	GO:0017038	protein import	10/50	199/18670	1.07001e-10	2.11519e-09	5.53779e-10	TP53/STAT3/PTGS2/MAPK1/AKT1/MAPK14/HSP90AA1/CDKN1A/TGFB1/IFNG	10
BP	GO:1902105	regulation of leukocyte differentiation	11/50	272/18670	1.15855e-10	2.27666e-09	5.96055e-10	JUN/TNF/MYC/MTOR/FOS/CREB1/CASP8/IL2/ERBB2/TGFB1/IFNG	11
BP	GO:1901655	cellular response to ketone	8/50	93/18670	1.26132e-10	2.46251e-09	6.44712e-10	EGFR/SRC/AKT1/CASP9/ICAM1/TGFB1/SPP1/AR	8
BP	GO:0038127	ERBB signaling pathway	9/50	142/18670	1.26796e-10	2.46251e-09	6.44712e-10	MAPK1/MMP9/EGFR/EGF/SRC/AKT1/HSP90AA1/ERBB2/TGFB1	9
BP	GO:0006606	protein import into nucleus	9/50	143/18670	1.35043e-10	2.60744e-09	6.82656e-10	TP53/STAT3/PTGS2/MAPK1/AKT1/MAPK14/CDKN1A/TGFB1/IFNG	9
BP	GO:0006109	regulation of carbohydrate metabolic process	10/50	206/18670	1.50317e-10	2.88557e-09	7.55474e-10	TP53/STAT3/EGF/SRC/MTOR/AKT1/EP300/HIF1A/TGFB1/IFNG	10
BP	GO:0062012	regulation of small molecule metabolic process	13/50	459/18670	1.56975e-10	2.99607e-09	7.84403e-10	TP53/STAT3/TNF/PTGS2/EGF/SRC/MTOR/AKT1/IL1B/EP300/HIF1A/TGFB1/IFNG	13
BP	GO:0045834	positive regulation of lipid metabolic process	9/50	146/18670	1.62695e-10	3.08749e-09	8.08339e-10	TNF/PTGS2/SRC/MTOR/AKT1/CREB1/IL1B/TGFB1/IFNG	9
BP	GO:0061900	glial cell activation	7/50	58/18670	1.72897e-10	3.24523e-09	8.49637e-10	IL6/JUN/TNF/EGFR/JAK2/IL1B/IFNG	7
BP	GO:0010212	response to ionizing radiation	9/50	147/18670	1.72962e-10	3.24523e-09	8.49637e-10	TP53/CASP3/MYC/BCL2L1/CCND1/MAPK14/CDKN1A/ICAM1/TGFB1	9
BP	GO:0030316	osteoclast differentiation	8/50	97/18670	1.77559e-10	3.31277e-09	8.6732e-10	TNF/SRC/MTOR/MAPK14/FOS/CREB1/TGFB1/IFNG	8
BP	GO:0042326	negative regulation of phosphorylation	13/50	468/18670	1.9933e-10	3.69818e-09	9.68223e-10	JUN/STAT3/CASP3/MYC/MTOR/PTEN/AKT1/IL2/CDKN1A/IL1B/IGF1R/TGFB1/IFNG	13
BP	GO:0051098	regulation of binding	12/50	373/18670	2.0788e-10	3.83539e-09	1.00415e-09	MAPK3/JUN/MAPK8/MMP9/EGF/SRC/AKT1/IL10/JAK2/EP300/TGFB1/IFNG	12
BP	GO:0007162	negative regulation of cell adhesion	11/50	289/18670	2.21074e-10	4.03815e-09	1.05723e-09	VEGFA/CASP3/SRC/PTEN/AKT1/IL10/IL2/ERBB2/JAK2/TGFB1/SERPINE1	11
BP	GO:0050708	regulation of protein secretion	13/50	472/18670	2.21302e-10	4.03815e-09	1.05723e-09	MAPK3/IL6/TNF/EGFR/SRC/IL10/MAPK14/IL2/JAK2/IL1B/HIF1A/TGFB1/IFNG	13
BP	GO:0043281	regulation of cysteine-type endopeptidase activity involved in apoptotic process	10/50	215/18670	2.28635e-10	4.12661e-09	1.08039e-09	VEGFA/TNF/PTGS2/MMP9/MYC/SRC/AKT1/CASP9/CASP8/JAK2	10
BP	GO:0070374	positive regulation of ERK1 and ERK2 cascade	10/50	215/18670	2.28635e-10	4.12661e-09	1.08039e-09	MAPK3/JUN/TNF/EGFR/SRC/PTEN/MAP2K1/CCL2/ICAM1/TGFB1	10
BP	GO:0010632	regulation of epithelial cell migration	11/50	291/18670	2.37894e-10	4.24757e-09	1.11206e-09	VEGFA/JUN/PTGS2/MMP9/SRC/MTOR/PTEN/AKT1/HIF1A/TGFB1/IFNG	11
BP	GO:0071356	cellular response to tumor necrosis factor	11/50	291/18670	2.37894e-10	4.24757e-09	1.11206e-09	MAPK3/TNF/MAPK1/CXCL8/AKT1/MAPK14/CASP8/CCL2/STAT1/JAK2/ICAM1	11
BP	GO:0062013	positive regulation of small molecule metabolic process	9/50	153/18670	2.47443e-10	4.39442e-09	1.15051e-09	STAT3/TNF/PTGS2/EGF/SRC/AKT1/IL1B/HIF1A/IFNG	9
BP	GO:0071241	cellular response to inorganic substance	10/50	217/18670	2.5033e-10	4.42205e-09	1.15774e-09	MAPK3/JUN/PTGS2/MAPK1/MAPK8/MMP9/EGFR/AKT1/FOS/CREB1	10
BP	GO:1903039	positive regulation of leukocyte cell-cell adhesion	10/50	218/18670	2.6185e-10	4.60109e-09	1.20461e-09	IL6/TNF/SRC/AKT1/IL2/CCL2/IL1B/ICAM1/TGFB1/IFNG	10
BP	GO:0046824	positive regulation of nucleocytoplasmic transport	7/50	62/18670	2.80523e-10	4.90324e-09	1.28372e-09	TP53/PTGS2/MAPK1/MAPK14/IL1B/TGFB1/IFNG	7
BP	GO:1901653	cellular response to peptide	12/50	385/18670	2.98769e-10	5.19483e-09	1.36006e-09	TP53/STAT3/SRC/PTEN/AKT1/CREB1/STAT1/JAK2/IL1B/IGF1R/ICAM1/TGFB1	12
BP	GO:0045444	fat cell differentiation	10/50	223/18670	3.26845e-10	5.6534e-09	1.48012e-09	IL6/TNF/PTGS2/MTOR/CCND1/AKT1/MAPK14/CREB1/EP300/TGFB1	10
BP	GO:0032768	regulation of monooxygenase activity	7/50	64/18670	3.52916e-10	6.07272e-09	1.5899e-09	TNF/EGFR/AKT1/HSP90AA1/IL1B/HIF1A/IFNG	7
BP	GO:0006914	autophagy	13/50	496/18670	4.06402e-10	6.92134e-09	1.81208e-09	MAPK3/TP53/STAT3/CASP3/MAPK8/SRC/MTOR/AKT1/IL10/HSP90AA1/EP300/HIF1A/IFNG	13
BP	GO:0061919	process utilizing autophagic mechanism	13/50	496/18670	4.06402e-10	6.92134e-09	1.81208e-09	MAPK3/TP53/STAT3/CASP3/MAPK8/SRC/MTOR/AKT1/IL10/HSP90AA1/EP300/HIF1A/IFNG	13
BP	GO:0051170	import into nucleus	9/50	163/18670	4.35323e-10	7.37606e-09	1.93113e-09	TP53/STAT3/PTGS2/MAPK1/AKT1/MAPK14/CDKN1A/TGFB1/IFNG	9
BP	GO:0002791	regulation of peptide secretion	13/50	500/18670	4.48327e-10	7.55783e-09	1.97872e-09	MAPK3/IL6/TNF/EGFR/SRC/IL10/MAPK14/IL2/JAK2/IL1B/HIF1A/TGFB1/IFNG	13
BP	GO:0050863	regulation of T cell activation	11/50	314/18670	5.32829e-10	8.93699e-09	2.3398e-09	IL6/CASP3/SRC/AKT1/IL10/IL2/CCL2/ERBB2/IL1B/TGFB1/IFNG	11
BP	GO:0046777	protein autophosphorylation	10/50	235/18670	5.44926e-10	9.09396e-09	2.3809e-09	VEGFA/MAPK3/JUN/EGFR/SRC/MTOR/AKT1/ERBB2/JAK2/IGF1R	10
BP	GO:0007050	cell cycle arrest	10/50	237/18670	5.91775e-10	9.77754e-09	2.55986e-09	TP53/MYC/CXCL8/MTOR/CCND1/MAP2K1/CDKN1A/EP300/TGFB1/IFNG	10
BP	GO:0032872	regulation of stress-activated MAPK cascade	10/50	237/18670	5.91775e-10	9.77754e-09	2.55986e-09	VEGFA/MAPK3/TNF/MAPK1/MYC/EGFR/MAP2K1/AKT1/IL1B/IGF1R	10
BP	GO:0043200	response to amino acid	8/50	113/18670	6.08836e-10	1.00096e-08	2.62063e-09	TNF/CASP3/EGFR/BCL2L1/MTOR/MMP2/CREB1/ICAM1	8
BP	GO:0070302	regulation of stress-activated protein kinase signaling cascade	10/50	239/18670	6.42176e-10	1.04543e-08	2.73704e-09	VEGFA/MAPK3/TNF/MAPK1/MYC/EGFR/MAP2K1/AKT1/IL1B/IGF1R	10
BP	GO:2000116	regulation of cysteine-type endopeptidase activity	10/50	239/18670	6.42176e-10	1.04543e-08	2.73704e-09	VEGFA/TNF/PTGS2/MMP9/MYC/SRC/AKT1/CASP9/CASP8/JAK2	10
BP	GO:0007569	cell aging	8/50	116/18670	7.51333e-10	1.21061e-08	3.16951e-09	TP53/MTOR/PTEN/MAP2K1/MAPK14/CDKN1A/ICAM1/SERPINE1	8
BP	GO:0021782	glial cell development	8/50	116/18670	7.51333e-10	1.21061e-08	3.16951e-09	IL6/TNF/EGFR/PTEN/AKT1/IL1B/TGFB1/IFNG	8
BP	GO:0009266	response to temperature stimulus	10/50	243/18670	7.54582e-10	1.21061e-08	3.16951e-09	MAPK3/PTGS2/MAPK1/MTOR/AKT1/FOS/CASP8/HSP90AA1/CDKN1A/EP300	10
BP	GO:0010506	regulation of autophagy	11/50	327/18670	8.17583e-10	1.30225e-08	3.40944e-09	MAPK3/TP53/STAT3/CASP3/MAPK8/MTOR/AKT1/IL10/EP300/HIF1A/IFNG	11
BP	GO:0038034	signal transduction in absence of ligand	7/50	72/18670	8.23466e-10	1.30225e-08	3.40944e-09	TNF/CASP3/BCL2L1/AKT1/CASP9/IL2/IL1B	7
BP	GO:0097192	extrinsic apoptotic signaling pathway in absence of ligand	7/50	72/18670	8.23466e-10	1.30225e-08	3.40944e-09	TNF/CASP3/BCL2L1/AKT1/CASP9/IL2/IL1B	7
BP	GO:0052548	regulation of endopeptidase activity	12/50	425/18670	9.21371e-10	1.45018e-08	3.79672e-09	VEGFA/STAT3/TNF/PTGS2/MMP9/MYC/SRC/AKT1/CASP9/CASP8/JAK2/SERPINE1	12
BP	GO:0048771	tissue remodeling	9/50	179/18670	9.99663e-10	1.56213e-08	4.08982e-09	IL6/TP53/EGFR/SRC/MMP2/IL2/HIF1A/TGFB1/SPP1	9
BP	GO:1900182	positive regulation of protein localization to nucleus	7/50	74/18670	1.00191e-09	1.56213e-08	4.08982e-09	PTGS2/MAPK1/SRC/AKT1/MAPK14/TGFB1/IFNG	7
BP	GO:0001933	negative regulation of protein phosphorylation	12/50	429/18670	1.02465e-09	1.59012e-08	4.1631e-09	JUN/CASP3/MYC/MTOR/PTEN/AKT1/IL2/CDKN1A/IL1B/IGF1R/TGFB1/IFNG	12
BP	GO:0002285	lymphocyte activation involved in immune response	9/50	181/18670	1.10294e-09	1.70366e-08	4.46037e-09	IL6/TP53/STAT3/MTOR/IL10/IL2/ICAM1/TGFB1/IFNG	9
BP	GO:0061138	morphogenesis of a branching epithelium	9/50	182/18670	1.15801e-09	1.7724e-08	4.64033e-09	VEGFA/TNF/MYC/EGF/SRC/IL10/ESR1/TGFB1/AR	9
BP	GO:0045930	negative regulation of mitotic cell cycle	11/50	338/18670	1.15812e-09	1.7724e-08	4.64033e-09	TP53/TNF/EGFR/BCL2L1/CCND1/PTEN/IL10/CCL2/CDKN1A/EP300/TGFB1	11
BP	GO:0050804	modulation of chemical synaptic transmission	12/50	436/18670	1.23085e-09	1.87507e-08	4.90913e-09	STAT3/TNF/PTGS2/MAPK1/EGFR/SRC/MTOR/PTEN/CREB1/CCL2/JAK2/IL1B	12
BP	GO:0099177	regulation of trans-synaptic signaling	12/50	437/18670	1.26318e-09	1.91381e-08	5.01056e-09	STAT3/TNF/PTGS2/MAPK1/EGFR/SRC/MTOR/PTEN/CREB1/CCL2/JAK2/IL1B	12
BP	GO:1903798	regulation of production of miRNAs involved in gene silencing by miRNA	5/50	19/18670	1.2678e-09	1.91381e-08	5.01056e-09	TP53/EGFR/MAP2K1/ESR1/TGFB1	5
BP	GO:0051101	regulation of DNA binding	8/50	124/18670	1.28123e-09	1.92532e-08	5.0407e-09	JUN/MAPK8/MMP9/EGF/JAK2/EP300/TGFB1/IFNG	8
BP	GO:0048638	regulation of developmental growth	11/50	347/18670	1.52609e-09	2.28294e-08	5.97699e-09	VEGFA/STAT3/MAPK1/MTOR/PTEN/AKT1/MAPK14/CREB1/CDKN1A/SPP1/AR	11
BP	GO:0034504	protein localization to nucleus	10/50	262/18670	1.56465e-09	2.33014e-08	6.10056e-09	TP53/STAT3/PTGS2/MAPK1/SRC/AKT1/MAPK14/CDKN1A/TGFB1/IFNG	10
BP	GO:0010631	epithelial cell migration	11/50	351/18670	1.72093e-09	2.55143e-08	6.67991e-09	VEGFA/JUN/PTGS2/MMP9/SRC/MTOR/PTEN/AKT1/HIF1A/TGFB1/IFNG	11
BP	GO:0090311	regulation of protein deacetylation	6/50	44/18670	1.76734e-09	2.60575e-08	6.82213e-09	VEGFA/TP53/MAPK8/EP300/TGFB1/IFNG	6
BP	GO:0071478	cellular response to radiation	9/50	191/18670	1.77326e-09	2.60575e-08	6.82213e-09	TP53/PTGS2/MYC/BCL2L1/MAPK14/CASP9/CDKN1A/EP300/TGFB1	9
BP	GO:0043112	receptor metabolic process	9/50	192/18670	1.85677e-09	2.71645e-08	7.11195e-09	VEGFA/TNF/EGF/CXCL8/IL10/JAK2/HIF1A/TGFB1/IFNG	9
BP	GO:0090132	epithelium migration	11/50	354/18670	1.88139e-09	2.74039e-08	7.17465e-09	VEGFA/JUN/PTGS2/MMP9/SRC/MTOR/PTEN/AKT1/HIF1A/TGFB1/IFNG	11
BP	GO:0031668	cellular response to extracellular stimulus	10/50	268/18670	1.94688e-09	2.8234e-08	7.39197e-09	MAPK3/TP53/JUN/PTGS2/MAPK1/MAPK8/MTOR/FOS/CDKN1A/ICAM1	10
BP	GO:0045598	regulation of fat cell differentiation	8/50	132/18670	2.10889e-09	3.04506e-08	7.97229e-09	IL6/TNF/PTGS2/MTOR/AKT1/MAPK14/CREB1/TGFB1	8
BP	GO:0070920	regulation of production of small RNA involved in gene silencing by RNA	5/50	21/18670	2.20975e-09	3.17688e-08	8.31741e-09	TP53/EGFR/MAP2K1/ESR1/TGFB1	5
BP	GO:0001763	morphogenesis of a branching structure	9/50	196/18670	2.22642e-09	3.18705e-08	8.34403e-09	VEGFA/TNF/MYC/EGF/SRC/IL10/ESR1/TGFB1/AR	9
BP	GO:0090130	tissue migration	11/50	360/18670	2.24315e-09	3.18724e-08	8.34453e-09	VEGFA/JUN/PTGS2/MMP9/SRC/MTOR/PTEN/AKT1/HIF1A/TGFB1/IFNG	11
BP	GO:0032868	response to insulin	10/50	272/18670	2.24575e-09	3.18724e-08	8.34453e-09	SRC/MTOR/PTEN/AKT1/IL10/CAT/STAT1/IL1B/IGF1R/ICAM1	10
BP	GO:0002718	regulation of cytokine production involved in immune response	7/50	84/18670	2.47127e-09	3.47758e-08	9.10467e-09	MAPK3/IL6/TNF/IL10/MAPK14/IL1B/TGFB1	7
BP	GO:0046889	positive regulation of lipid biosynthetic process	7/50	84/18670	2.47127e-09	3.47758e-08	9.10467e-09	TNF/PTGS2/MTOR/AKT1/CREB1/IL1B/IFNG	7
BP	GO:0060485	mesenchyme development	10/50	278/18670	2.77065e-09	3.88241e-08	1.01646e-08	MAPK3/IL6/MAPK1/MYC/MTOR/PTEN/STAT1/IL1B/HIF1A/TGFB1	10
BP	GO:0046425	regulation of JAK-STAT cascade	8/50	137/18670	2.83374e-09	3.95414e-08	1.03524e-08	IL6/STAT3/TNF/EGF/IL10/IL2/JAK2/IFNG	8
BP	GO:0051972	regulation of telomerase activity	6/50	48/18670	3.0476e-09	4.21711e-08	1.10409e-08	MAPK3/TP53/MAPK1/MYC/SRC/HSP90AA1	6
BP	GO:0060324	face development	6/50	48/18670	3.0476e-09	4.21711e-08	1.10409e-08	MAPK3/MAPK1/MAP2K1/MMP2/EP300/TGFB1	6
BP	GO:0030100	regulation of endocytosis	10/50	281/18670	3.07186e-09	4.23305e-08	1.10826e-08	VEGFA/TNF/EGF/SRC/PTEN/CCL2/IL1B/TGFB1/SERPINE1/IFNG	10
BP	GO:0050769	positive regulation of neurogenesis	12/50	474/18670	3.15853e-09	4.32687e-08	1.13282e-08	VEGFA/IL6/TNF/MTOR/PTEN/MAP2K1/IL2/IL1B/EP300/HIF1A/TGFB1/IFNG	12
BP	GO:0001892	embryonic placenta development	7/50	87/18670	3.16893e-09	4.32687e-08	1.13282e-08	MAPK1/EGFR/MAP2K1/AKT1/IL10/CASP8/HIF1A	7
BP	GO:0002700	regulation of production of molecular mediator of immune response	8/50	139/18670	3.17903e-09	4.32687e-08	1.13282e-08	MAPK3/IL6/TNF/IL10/MAPK14/IL2/IL1B/TGFB1	8
BP	GO:0001701	in utero embryonic development	11/50	373/18670	3.24879e-09	4.40377e-08	1.15295e-08	VEGFA/TP53/MAPK1/EGFR/BCL2L1/MAP2K1/AKT1/IL10/CASP8/HIF1A/AR	11
BP	GO:0034103	regulation of tissue remodeling	7/50	88/18670	3.43584e-09	4.6196e-08	1.20946e-08	IL6/TP53/EGFR/SRC/IL2/TGFB1/SPP1	7
BP	GO:1904035	regulation of epithelial cell apoptotic process	7/50	88/18670	3.43584e-09	4.6196e-08	1.20946e-08	IL6/TNF/MTOR/CCL2/JAK2/ICAM1/SERPINE1	7
BP	GO:1904707	positive regulation of vascular smooth muscle cell proliferation	6/50	49/18670	3.46583e-09	4.64113e-08	1.2151e-08	JUN/TNF/MMP9/IL10/MMP2/JAK2	6
BP	GO:2000637	positive regulation of gene silencing by miRNA	5/50	23/18670	3.63937e-09	4.85395e-08	1.27082e-08	TP53/STAT3/EGFR/MAP2K1/TGFB1	5
BP	GO:0046427	positive regulation of JAK-STAT cascade	7/50	89/18670	3.72161e-09	4.94379e-08	1.29434e-08	IL6/STAT3/TNF/IL10/IL2/JAK2/IFNG	7
BP	GO:0007623	circadian rhythm	9/50	208/18670	3.75178e-09	4.94431e-08	1.29447e-08	TP53/JUN/MAPK8/EGFR/MTOR/PTEN/CREB1/EP300/SERPINE1	9
BP	GO:1901215	negative regulation of neuron death	9/50	208/18670	3.75178e-09	4.94431e-08	1.29447e-08	JUN/STAT3/BCL2L1/AKT1/IL10/CREB1/CCL2/JAK2/HIF1A	9
BP	GO:0071229	cellular response to acid chemical	9/50	209/18670	3.91281e-09	5.13615e-08	1.3447e-08	VEGFA/TNF/EGFR/SRC/BCL2L1/MTOR/AKT1/MMP2/CREB1	9
BP	GO:0071674	mononuclear cell migration	7/50	90/18670	4.02734e-09	5.26567e-08	1.37861e-08	MAPK3/IL6/TNF/MAPK14/CCL2/TGFB1/SERPINE1	7
BP	GO:0043523	regulation of neuron apoptotic process	9/50	210/18670	4.07988e-09	5.27989e-08	1.38233e-08	TP53/JUN/TNF/CASP3/BCL2L1/CASP9/CCL2/JAK2/HIF1A	9
BP	GO:0050727	regulation of inflammatory response	12/50	485/18670	4.08592e-09	5.27989e-08	1.38233e-08	IL6/TNF/PTGS2/MMP9/EGFR/IL10/MAPK14/ESR1/IL2/JAK2/IL1B/SERPINE1	12
BP	GO:0051249	regulation of lymphocyte activation	12/50	485/18670	4.08592e-09	5.27989e-08	1.38233e-08	IL6/CASP3/SRC/AKT1/IL10/IL2/CCL2/ERBB2/CDKN1A/IL1B/TGFB1/IFNG	12
BP	GO:1902107	positive regulation of leukocyte differentiation	8/50	144/18670	4.20595e-09	5.41394e-08	1.41743e-08	JUN/TNF/FOS/CREB1/CASP8/IL2/TGFB1/IFNG	8
BP	GO:0045765	regulation of angiogenesis	11/50	383/18670	4.27934e-09	5.48714e-08	1.43659e-08	VEGFA/IL6/STAT3/PTGS2/CXCL8/IL10/ERBB2/STAT1/IL1B/HIF1A/SERPINE1	11
BP	GO:0048146	positive regulation of fibroblast proliferation	6/50	51/18670	4.44554e-09	5.65657e-08	1.48095e-08	JUN/MYC/EGFR/ESR1/CDKN1A/TGFB1	6
BP	GO:0050999	regulation of nitric-oxide synthase activity	6/50	51/18670	4.44554e-09	5.65657e-08	1.48095e-08	TNF/EGFR/AKT1/HSP90AA1/IL1B/HIF1A	6
BP	GO:0060148	positive regulation of posttranscriptional gene silencing	5/50	24/18670	4.58786e-09	5.81538e-08	1.52253e-08	TP53/STAT3/EGFR/MAP2K1/TGFB1	5
BP	GO:1904892	regulation of STAT cascade	8/50	146/18670	4.69073e-09	5.91642e-08	1.54898e-08	IL6/STAT3/TNF/EGF/IL10/IL2/JAK2/IFNG	8
BP	GO:1904894	positive regulation of STAT cascade	7/50	92/18670	4.70321e-09	5.91642e-08	1.54898e-08	IL6/STAT3/TNF/IL10/IL2/JAK2/IFNG	7
BP	GO:0002262	myeloid cell homeostasis	8/50	147/18670	4.95075e-09	6.20431e-08	1.62436e-08	VEGFA/IL6/STAT3/CASP3/MAPK14/STAT1/JAK2/HIF1A	8
BP	GO:0045787	positive regulation of cell cycle	11/50	389/18670	5.02981e-09	6.2797e-08	1.64409e-08	TP53/EGFR/EGF/SRC/CCND1/AKT1/IL10/CDKN1A/IL1B/EP300/TGFB1	11
BP	GO:0050867	positive regulation of cell activation	11/50	394/18670	5.74298e-09	7.14324e-08	1.87018e-08	IL6/SRC/AKT1/IL10/IL2/CCL2/CDKN1A/JAK2/IL1B/TGFB1/IFNG	11
BP	GO:0048754	branching morphogenesis of an epithelial tube	8/50	150/18670	5.80707e-09	7.196e-08	1.88399e-08	VEGFA/TNF/MYC/EGF/SRC/ESR1/TGFB1/AR	8
BP	GO:0048762	mesenchymal cell differentiation	9/50	219/18670	5.88888e-09	7.25271e-08	1.89884e-08	MAPK3/IL6/MAPK1/MTOR/PTEN/STAT1/IL1B/HIF1A/TGFB1	9
BP	GO:1903076	regulation of protein localization to plasma membrane	7/50	95/18670	5.89652e-09	7.25271e-08	1.89884e-08	TNF/EGFR/BCL2L1/AKT1/TGFB1/IFNG/AR	7
BP	GO:0034250	positive regulation of cellular amide metabolic process	8/50	153/18670	6.78868e-09	8.25832e-08	2.16212e-08	MAPK3/IL6/TNF/MAPK1/CASP3/MTOR/ERBB2/IFNG	8
BP	GO:0050729	positive regulation of inflammatory response	8/50	153/18670	6.78868e-09	8.25832e-08	2.16212e-08	IL6/TNF/PTGS2/EGFR/IL2/JAK2/IL1B/SERPINE1	8
BP	GO:0090316	positive regulation of intracellular protein transport	8/50	153/18670	6.78868e-09	8.25832e-08	2.16212e-08	TP53/PTGS2/MAPK1/MAPK14/ERBB2/IL1B/TGFB1/IFNG	8
BP	GO:0032800	receptor biosynthetic process	5/50	26/18670	7.07177e-09	8.5713e-08	2.24406e-08	TNF/IL10/JAK2/HIF1A/IFNG	5
BP	GO:0030595	leukocyte chemotaxis	9/50	224/18670	7.17101e-09	8.65997e-08	2.26727e-08	VEGFA/MAPK3/IL6/CXCL8/IL10/MAPK14/CCL2/IL1B/SERPINE1	9
BP	GO:0030856	regulation of epithelial cell differentiation	8/50	156/18670	7.91066e-09	9.51859e-08	2.49207e-08	VEGFA/TNF/MMP9/CCND1/STAT1/IL1B/SERPINE1/IFNG	8
BP	GO:0048143	astrocyte activation	5/50	27/18670	8.66156e-09	1.03845e-07	2.71877e-08	IL6/TNF/EGFR/IL1B/IFNG	5
BP	GO:0009743	response to carbohydrate	9/50	230/18670	9.0277e-09	1.07845e-07	2.82351e-08	PTGS2/CASP3/PTEN/CAT/IL1B/IGF1R/ICAM1/HIF1A/TGFB1	9
BP	GO:1903800	positive regulation of production of miRNAs involved in gene silencing by miRNA	4/50	10/18670	9.44376e-09	1.12411e-07	2.94305e-08	TP53/EGFR/MAP2K1/TGFB1	4
BP	GO:0000079	regulation of cyclin-dependent protein serine/threonine kinase activity	7/50	102/18670	9.71587e-09	1.14827e-07	3.0063e-08	CASP3/EGFR/SRC/CCND1/PTEN/AKT1/CDKN1A	7
BP	GO:0002367	cytokine production involved in immune response	7/50	102/18670	9.71587e-09	1.14827e-07	3.0063e-08	MAPK3/IL6/TNF/IL10/MAPK14/IL1B/TGFB1	7
BP	GO:0032770	positive regulation of monooxygenase activity	5/50	28/18670	1.05233e-08	1.23929e-07	3.24459e-08	TNF/AKT1/IL1B/HIF1A/IFNG	5
BP	GO:0043388	positive regulation of DNA binding	6/50	59/18670	1.09436e-08	1.2823e-07	3.3572e-08	MMP9/EGF/JAK2/EP300/TGFB1/IFNG	6
BP	GO:0071375	cellular response to peptide hormone stimulus	10/50	321/18670	1.09658e-08	1.2823e-07	3.3572e-08	STAT3/SRC/PTEN/AKT1/CREB1/STAT1/JAK2/IL1B/IGF1R/TGFB1	10
BP	GO:0046822	regulation of nucleocytoplasmic transport	7/50	104/18670	1.11315e-08	1.29711e-07	3.39598e-08	TP53/PTGS2/MAPK1/MAPK14/IL1B/TGFB1/IFNG	7
BP	GO:0060562	epithelial tube morphogenesis	10/50	322/18670	1.1295e-08	1.31156e-07	3.4338e-08	VEGFA/TNF/CASP3/MYC/EGF/SRC/ESR1/HIF1A/TGFB1/AR	10
BP	GO:1901342	regulation of vasculature development	11/50	422/18670	1.16831e-08	1.35095e-07	3.53695e-08	VEGFA/IL6/STAT3/PTGS2/CXCL8/IL10/ERBB2/STAT1/IL1B/HIF1A/SERPINE1	11
BP	GO:0031669	cellular response to nutrient levels	9/50	237/18670	1.17156e-08	1.35095e-07	3.53695e-08	MAPK3/TP53/JUN/PTGS2/MAPK1/MAPK8/MTOR/CDKN1A/ICAM1	9
BP	GO:0032386	regulation of intracellular transport	11/50	423/18670	1.19717e-08	1.37571e-07	3.60177e-08	MAPK3/TP53/PTGS2/MAPK1/SRC/MAP2K1/MAPK14/ERBB2/IL1B/TGFB1/IFNG	11
BP	GO:0051402	neuron apoptotic process	9/50	239/18670	1.26022e-08	1.44156e-07	3.77417e-08	TP53/JUN/TNF/CASP3/BCL2L1/CASP9/CCL2/JAK2/HIF1A	9
BP	GO:0010575	positive regulation of vascular endothelial growth factor production	5/50	29/18670	1.26901e-08	1.44156e-07	3.77417e-08	IL6/PTGS2/IL1B/HIF1A/TGFB1	5
BP	GO:0002286	T cell activation involved in immune response	7/50	106/18670	1.27184e-08	1.44156e-07	3.77417e-08	IL6/TP53/STAT3/MTOR/IL2/ICAM1/IFNG	7
BP	GO:1904029	regulation of cyclin-dependent protein kinase activity	7/50	106/18670	1.27184e-08	1.44156e-07	3.77417e-08	CASP3/EGFR/SRC/CCND1/PTEN/AKT1/CDKN1A	7
BP	GO:0051341	regulation of oxidoreductase activity	7/50	107/18670	1.35812e-08	1.53412e-07	4.0165e-08	TNF/EGFR/AKT1/HSP90AA1/IL1B/HIF1A/IFNG	7
BP	GO:0001655	urogenital system development	10/50	330/18670	1.426e-08	1.60534e-07	4.20295e-08	VEGFA/MMP9/MYC/PTEN/CAT/CASP9/ESR1/STAT1/TGFB1/AR	10
BP	GO:2000278	regulation of DNA biosynthetic process	7/50	108/18670	1.44932e-08	1.62607e-07	4.25724e-08	MAPK3/TP53/MAPK1/MYC/SRC/HSP90AA1/CDKN1A	7
BP	GO:0046886	positive regulation of hormone biosynthetic process	4/50	11/18670	1.48109e-08	1.65613e-07	4.33593e-08	TNF/IL1B/HIF1A/IFNG	4
BP	GO:0060249	anatomical structure homeostasis	11/50	437/18670	1.67384e-08	1.86538e-07	4.88376e-08	VEGFA/MAPK3/IL6/MAPK1/MYC/EGFR/SRC/HSP90AA1/HIF1A/TGFB1/SPP1	11
BP	GO:0030324	lung development	8/50	172/18670	1.70201e-08	1.89042e-07	4.94933e-08	VEGFA/MAPK3/TNF/MAPK1/EGFR/MAP2K1/CREB1/EP300	8
BP	GO:0006352	DNA-templated transcription, initiation	9/50	249/18670	1.79761e-08	1.98996e-07	5.20992e-08	MAPK3/TP53/JUN/CCND1/PTEN/ESR1/CREB1/CDKN1A/AR	9
BP	GO:0071383	cellular response to steroid hormone stimulus	9/50	250/18670	1.86103e-08	2.05332e-07	5.37581e-08	EGFR/SRC/CASP9/ESR1/JAK2/ICAM1/EP300/TGFB1/AR	9
BP	GO:0001938	positive regulation of endothelial cell proliferation	7/50	112/18670	1.86789e-08	2.05407e-07	5.37777e-08	VEGFA/JUN/STAT3/MTOR/AKT1/IL10/HIF1A	7
BP	GO:0014823	response to activity	6/50	65/18670	1.98197e-08	2.17232e-07	5.68736e-08	MTOR/PTEN/IL10/CAT/CREB1/HIF1A	6
BP	GO:0009408	response to heat	8/50	176/18670	2.03703e-08	2.21803e-07	5.80703e-08	MAPK3/PTGS2/MAPK1/MTOR/AKT1/HSP90AA1/CDKN1A/EP300	8
BP	GO:0030323	respiratory tube development	8/50	176/18670	2.03703e-08	2.21803e-07	5.80703e-08	VEGFA/MAPK3/TNF/MAPK1/EGFR/MAP2K1/CREB1/EP300	8
BP	GO:0006913	nucleocytoplasmic transport	10/50	343/18670	2.05627e-08	2.23166e-07	5.84273e-08	TP53/STAT3/PTGS2/MAPK1/AKT1/MAPK14/CDKN1A/IL1B/TGFB1/IFNG	10
BP	GO:0002688	regulation of leukocyte chemotaxis	7/50	114/18670	2.11296e-08	2.27091e-07	5.9455e-08	VEGFA/MAPK3/IL6/CXCL8/MAPK14/CCL2/SERPINE1	7
BP	GO:0030218	erythrocyte differentiation	7/50	114/18670	2.11296e-08	2.27091e-07	5.9455e-08	VEGFA/STAT3/CASP3/MAPK14/STAT1/JAK2/HIF1A	7
BP	GO:0042035	regulation of cytokine biosynthetic process	7/50	114/18670	2.11296e-08	2.27091e-07	5.9455e-08	IL6/STAT3/TNF/IL10/JAK2/IL1B/IFNG	7
BP	GO:0038128	ERBB2 signaling pathway	5/50	32/18670	2.13896e-08	2.29145e-07	5.99926e-08	EGFR/EGF/SRC/HSP90AA1/ERBB2	5
BP	GO:0051169	nuclear transport	10/50	346/18670	2.23272e-08	2.3842e-07	6.2421e-08	TP53/STAT3/PTGS2/MAPK1/AKT1/MAPK14/CDKN1A/IL1B/TGFB1/IFNG	10
BP	GO:1904375	regulation of protein localization to cell periphery	7/50	115/18670	2.24536e-08	2.39002e-07	6.25732e-08	TNF/EGFR/BCL2L1/AKT1/TGFB1/IFNG/AR	7
BP	GO:1900180	regulation of protein localization to nucleus	7/50	116/18670	2.38474e-08	2.52241e-07	6.60395e-08	PTGS2/MAPK1/SRC/AKT1/MAPK14/TGFB1/IFNG	7
BP	GO:0042108	positive regulation of cytokine biosynthetic process	6/50	67/18670	2.38494e-08	2.52241e-07	6.60395e-08	IL6/STAT3/TNF/JAK2/IL1B/IFNG	6
BP	GO:1905330	regulation of morphogenesis of an epithelium	8/50	180/18670	2.42753e-08	2.55931e-07	6.70055e-08	VEGFA/TNF/MTOR/PTEN/ESR1/STAT1/TGFB1/AR	8
BP	GO:0022408	negative regulation of cell-cell adhesion	8/50	181/18670	2.53468e-08	2.66383e-07	6.97418e-08	VEGFA/CASP3/AKT1/IL10/IL2/ERBB2/JAK2/TGFB1	8
BP	GO:0030098	lymphocyte differentiation	10/50	353/18670	2.69754e-08	2.82603e-07	7.39885e-08	IL6/TP53/STAT3/MTOR/IL10/IL2/ERBB2/EP300/TGFB1/IFNG	10
BP	GO:0001505	regulation of neurotransmitter levels	10/50	354/18670	2.77048e-08	2.89332e-07	7.57504e-08	TNF/PTGS2/MTOR/AKT1/IL10/HSP90AA1/JAK2/IL1B/ICAM1/IFNG	10
BP	GO:0070227	lymphocyte apoptotic process	6/50	69/18670	2.85329e-08	2.97046e-07	7.77699e-08	TP53/PTEN/AKT1/IL10/IL2/HIF1A	6
BP	GO:0042098	T cell proliferation	8/50	184/18670	2.88101e-08	2.98064e-07	7.80363e-08	IL6/TP53/CASP3/IL10/IL2/ERBB2/IL1B/TGFB1	8
BP	GO:2000045	regulation of G1/S transition of mitotic cell cycle	8/50	184/18670	2.88101e-08	2.98064e-07	7.80363e-08	TP53/EGFR/CCND1/PTEN/AKT1/CCL2/CDKN1A/EP300	8
BP	GO:0001667	ameboidal-type cell migration	11/50	461/18670	2.89547e-08	2.98629e-07	7.81844e-08	VEGFA/JUN/PTGS2/MMP9/SRC/MTOR/PTEN/AKT1/HIF1A/TGFB1/IFNG	11
BP	GO:0010574	regulation of vascular endothelial growth factor production	5/50	34/18670	2.9437e-08	3.02663e-07	7.92406e-08	IL6/PTGS2/IL1B/HIF1A/TGFB1	5
BP	GO:0031331	positive regulation of cellular catabolic process	10/50	361/18670	3.33187e-08	3.41517e-07	8.94129e-08	MAPK3/IL6/TNF/EGF/PTEN/AKT1/HSP90AA1/IL1B/HIF1A/IFNG	10
BP	GO:0034101	erythrocyte homeostasis	7/50	122/18670	3.38454e-08	3.45848e-07	9.05467e-08	VEGFA/STAT3/CASP3/MAPK14/STAT1/JAK2/HIF1A	7
BP	GO:0042531	positive regulation of tyrosine phosphorylation of STAT protein	6/50	71/18670	3.39509e-08	3.45862e-07	9.05503e-08	IL6/STAT3/TNF/IL2/JAK2/IFNG	6
BP	GO:0001893	maternal placenta development	5/50	35/18670	3.42742e-08	3.45971e-07	9.05791e-08	MAPK3/PTGS2/MAPK1/AKT1/SPP1	5
BP	GO:0060251	regulation of glial cell proliferation	5/50	35/18670	3.42742e-08	3.45971e-07	9.05791e-08	IL6/TNF/MTOR/CREB1/IL1B	5
BP	GO:1904031	positive regulation of cyclin-dependent protein kinase activity	5/50	35/18670	3.42742e-08	3.45971e-07	9.05791e-08	EGFR/SRC/CCND1/AKT1/CDKN1A	5
BP	GO:0042089	cytokine biosynthetic process	7/50	123/18670	3.58153e-08	3.60432e-07	9.43651e-08	IL6/STAT3/TNF/IL10/JAK2/IL1B/IFNG	7
BP	GO:0045927	positive regulation of growth	9/50	270/18670	3.61403e-08	3.62604e-07	9.49336e-08	VEGFA/MAPK1/EGFR/MTOR/AKT1/MAPK14/CREB1/IL2/ERBB2	9
BP	GO:0008637	apoptotic mitochondrial changes	7/50	124/18670	3.78815e-08	3.77791e-07	9.89097e-08	TP53/JUN/MAPK8/MMP9/BCL2L1/AKT1/CASP8	7
BP	GO:0042107	cytokine metabolic process	7/50	124/18670	3.78815e-08	3.77791e-07	9.89097e-08	IL6/STAT3/TNF/IL10/JAK2/IL1B/IFNG	7
BP	GO:0046651	lymphocyte proliferation	9/50	272/18670	3.85071e-08	3.8288e-07	1.00242e-07	IL6/TP53/CASP3/IL10/IL2/ERBB2/CDKN1A/IL1B/TGFB1	9
BP	GO:0010573	vascular endothelial growth factor production	5/50	36/18670	3.97224e-08	3.93785e-07	1.03097e-07	IL6/PTGS2/IL1B/HIF1A/TGFB1	5
BP	GO:0045471	response to ethanol	7/50	125/18670	4.00476e-08	3.95828e-07	1.03632e-07	STAT3/CCND1/PTEN/CAT/CASP8/IL2/ICAM1	7
BP	GO:0006909	phagocytosis	10/50	369/18670	4.09468e-08	4.02925e-07	1.0549e-07	MAPK3/TNF/MAPK1/SRC/PTEN/HSP90AA1/CCL2/IL1B/TGFB1/IFNG	10
BP	GO:0032943	mononuclear cell proliferation	9/50	274/18670	4.10084e-08	4.02925e-07	1.0549e-07	IL6/TP53/CASP3/IL10/IL2/ERBB2/CDKN1A/IL1B/TGFB1	9
BP	GO:0007219	Notch signaling pathway	8/50	193/18670	4.17608e-08	4.09108e-07	1.07109e-07	STAT3/MYC/EGFR/EGF/AKT1/STAT1/EP300/TGFB1	8
BP	GO:0018107	peptidyl-threonine phosphorylation	7/50	126/18670	4.23177e-08	4.13345e-07	1.08218e-07	MAPK1/MAPK8/EGF/MTOR/MAP2K1/AKT1/TGFB1	7
BP	GO:0038083	peptidyl-tyrosine autophosphorylation	5/50	37/18670	4.58367e-08	4.45099e-07	1.16532e-07	VEGFA/MAPK3/EGFR/SRC/IGF1R	5
BP	GO:0042307	positive regulation of protein import into nucleus	5/50	37/18670	4.58367e-08	4.45099e-07	1.16532e-07	PTGS2/MAPK1/MAPK14/TGFB1/IFNG	5
BP	GO:0034763	negative regulation of transmembrane transport	7/50	128/18670	4.7186e-08	4.56865e-07	1.19612e-07	TNF/MMP9/MTOR/PTEN/AKT1/IL1B/TGFB1	7
BP	GO:0016049	cell growth	11/50	484/18670	4.75705e-08	4.59249e-07	1.20236e-07	VEGFA/TP53/EGFR/MTOR/AKT1/IL2/HSP90AA1/ERBB2/CDKN1A/TGFB1/SPP1	11
BP	GO:0000082	G1/S transition of mitotic cell cycle	9/50	279/18670	4.78927e-08	4.61019e-07	1.207e-07	TP53/MYC/EGFR/CCND1/PTEN/AKT1/CCL2/CDKN1A/EP300	9
BP	GO:0048871	multicellular organismal homeostasis	11/50	485/18670	4.85796e-08	4.6628e-07	1.22077e-07	VEGFA/IL6/STAT3/TNF/PTGS2/EGFR/SRC/JAK2/IL1B/IGF1R/SPP1	11
BP	GO:0010952	positive regulation of peptidase activity	8/50	197/18670	4.89621e-08	4.68597e-07	1.22684e-07	MAPK3/STAT3/TNF/MYC/MAPK14/CASP9/CASP8/JAK2	8
BP	GO:0060541	respiratory system development	8/50	198/18670	5.09212e-08	4.85946e-07	1.27226e-07	VEGFA/MAPK3/TNF/MAPK1/EGFR/MAP2K1/CREB1/EP300	8
BP	GO:0002696	positive regulation of leukocyte activation	10/50	380/18670	5.39417e-08	5.13296e-07	1.34387e-07	IL6/SRC/AKT1/IL10/IL2/CCL2/CDKN1A/IL1B/TGFB1/IFNG	10
BP	GO:0031647	regulation of protein stability	9/50	284/18670	5.57664e-08	5.29144e-07	1.38536e-07	TP53/MAPK1/CASP3/SRC/PTEN/CREB1/HSP90AA1/CDKN1A/EP300	9
BP	GO:0051348	negative regulation of transferase activity	9/50	285/18670	5.74701e-08	5.43756e-07	1.42361e-07	TP53/CASP3/SRC/PTEN/AKT1/CDKN1A/IL1B/IGF1R/IFNG	9
BP	GO:0050870	positive regulation of T cell activation	8/50	202/18670	5.94486e-08	5.59288e-07	1.46428e-07	IL6/SRC/AKT1/IL2/CCL2/IL1B/TGFB1/IFNG	8
BP	GO:1902806	regulation of cell cycle G1/S phase transition	8/50	202/18670	5.94486e-08	5.59288e-07	1.46428e-07	TP53/EGFR/CCND1/PTEN/AKT1/CCL2/CDKN1A/EP300	8
BP	GO:1904591	positive regulation of protein import	5/50	39/18670	6.03008e-08	5.63846e-07	1.47621e-07	PTGS2/MAPK1/MAPK14/TGFB1/IFNG	5
BP	GO:0032352	positive regulation of hormone metabolic process	4/50	15/18670	6.07819e-08	5.63846e-07	1.47621e-07	TNF/IL1B/HIF1A/IFNG	4
BP	GO:0034349	glial cell apoptotic process	4/50	15/18670	6.07819e-08	5.63846e-07	1.47621e-07	TP53/CASP3/CASP9/CCL2	4
BP	GO:0045073	regulation of chemokine biosynthetic process	4/50	15/18670	6.07819e-08	5.63846e-07	1.47621e-07	IL6/TNF/IL1B/IFNG	4
BP	GO:0051770	positive regulation of nitric-oxide synthase biosynthetic process	4/50	15/18670	6.07819e-08	5.63846e-07	1.47621e-07	CCL2/STAT1/JAK2/IFNG	4
BP	GO:0045766	positive regulation of angiogenesis	8/50	204/18670	6.4155e-08	5.93478e-07	1.55379e-07	VEGFA/STAT3/PTGS2/CXCL8/IL10/IL1B/HIF1A/SERPINE1	8
BP	GO:0018210	peptidyl-threonine modification	7/50	134/18670	6.47305e-08	5.97139e-07	1.56338e-07	MAPK1/MAPK8/EGF/MTOR/MAP2K1/AKT1/TGFB1	7
BP	GO:0050921	positive regulation of chemotaxis	7/50	135/18670	6.81326e-08	6.26782e-07	1.64098e-07	VEGFA/MAPK3/IL6/CXCL8/MAPK14/TGFB1/SERPINE1	7
BP	GO:0002064	epithelial cell development	8/50	207/18670	7.18153e-08	6.55216e-07	1.71543e-07	VEGFA/TNF/ESR1/CDKN1A/IL1B/ICAM1/HIF1A/AR	8
BP	GO:0034284	response to monosaccharide	8/50	207/18670	7.18153e-08	6.55216e-07	1.71543e-07	PTGS2/CASP3/PTEN/CAT/IGF1R/ICAM1/HIF1A/TGFB1	8
BP	GO:0070555	response to interleukin-1	8/50	207/18670	7.18153e-08	6.55216e-07	1.71543e-07	MAPK3/IL6/SRC/CXCL8/CCL2/IL1B/ICAM1/HIF1A	8
BP	GO:0050670	regulation of lymphocyte proliferation	8/50	208/18670	7.45378e-08	6.78192e-07	1.77558e-07	IL6/CASP3/IL10/IL2/ERBB2/CDKN1A/IL1B/TGFB1	8
BP	GO:0034605	cellular response to heat	7/50	137/18670	7.5392e-08	6.8409e-07	1.79102e-07	MAPK3/PTGS2/MAPK1/MTOR/HSP90AA1/CDKN1A/EP300	7
BP	GO:0032944	regulation of mononuclear cell proliferation	8/50	209/18670	7.73488e-08	6.99933e-07	1.8325e-07	IL6/CASP3/IL10/IL2/ERBB2/CDKN1A/IL1B/TGFB1	8
BP	GO:0150077	regulation of neuroinflammatory response	5/50	41/18670	7.81718e-08	7.05458e-07	1.84696e-07	IL6/TNF/PTGS2/MMP9/IL1B	5
BP	GO:0097529	myeloid leukocyte migration	8/50	210/18670	8.02505e-08	7.2086e-07	1.88729e-07	VEGFA/MAPK3/IL6/CXCL8/MAPK14/CCL2/IL1B/SERPINE1	8
BP	GO:0002739	regulation of cytokine secretion involved in immune response	4/50	16/18670	8.08828e-08	7.2086e-07	1.88729e-07	MAPK3/TNF/IL10/MAPK14	4
BP	GO:0042033	chemokine biosynthetic process	4/50	16/18670	8.08828e-08	7.2086e-07	1.88729e-07	IL6/TNF/IL1B/IFNG	4
BP	GO:0050755	chemokine metabolic process	4/50	16/18670	8.08828e-08	7.2086e-07	1.88729e-07	IL6/TNF/IL1B/IFNG	4
BP	GO:0032642	regulation of chemokine production	6/50	82/18670	8.11809e-08	7.2086e-07	1.88729e-07	IL6/TNF/IL10/IL1B/HIF1A/IFNG	6
BP	GO:0034644	cellular response to UV	6/50	82/18670	8.11809e-08	7.2086e-07	1.88729e-07	TP53/PTGS2/MYC/CASP9/CDKN1A/EP300	6
BP	GO:0050715	positive regulation of cytokine secretion	7/50	139/18670	8.32948e-08	7.37658e-07	1.93127e-07	MAPK3/TNF/SRC/IL10/MAPK14/IL1B/IFNG	7
BP	GO:0044843	cell cycle G1/S phase transition	9/50	298/18670	8.41324e-08	7.39163e-07	1.93521e-07	TP53/MYC/EGFR/CCND1/PTEN/AKT1/CCL2/CDKN1A/EP300	9
BP	GO:0070661	leukocyte proliferation	9/50	298/18670	8.41324e-08	7.39163e-07	1.93521e-07	IL6/TP53/CASP3/IL10/IL2/ERBB2/CDKN1A/IL1B/TGFB1	9
BP	GO:0090068	positive regulation of cell cycle process	9/50	298/18670	8.41324e-08	7.39163e-07	1.93521e-07	TP53/EGFR/EGF/CCND1/AKT1/CDKN1A/IL1B/EP300/TGFB1	9
BP	GO:0042509	regulation of tyrosine phosphorylation of STAT protein	6/50	83/18670	8.73298e-08	7.6523e-07	2.00345e-07	IL6/STAT3/TNF/IL2/JAK2/IFNG	6
BP	GO:0032388	positive regulation of intracellular transport	8/50	215/18670	9.62082e-08	8.40809e-07	2.20133e-07	TP53/PTGS2/MAPK1/MAPK14/ERBB2/IL1B/TGFB1/IFNG	8
BP	GO:0002699	positive regulation of immune effector process	8/50	216/18670	9.97078e-08	8.66843e-07	2.26949e-07	MAPK3/IL6/TNF/MAPK14/IL2/IL1B/TGFB1/IFNG	8
BP	GO:0060326	cell chemotaxis	9/50	304/18670	9.97092e-08	8.66843e-07	2.26949e-07	VEGFA/MAPK3/IL6/CXCL8/IL10/MAPK14/CCL2/IL1B/SERPINE1	9
BP	GO:0034198	cellular response to amino acid starvation	5/50	43/18670	1.00008e-07	8.67174e-07	2.27036e-07	MAPK3/MAPK1/MAPK8/MTOR/CDKN1A	5
BP	GO:0008406	gonad development	8/50	217/18670	1.03316e-07	8.91204e-07	2.33327e-07	VEGFA/CASP3/SRC/BCL2L1/CCND1/ESR1/ICAM1/AR	8
BP	GO:0050920	regulation of chemotaxis	8/50	217/18670	1.03316e-07	8.91204e-07	2.33327e-07	VEGFA/MAPK3/IL6/CXCL8/MAPK14/CCL2/TGFB1/SERPINE1	8
BP	GO:2000641	regulation of early endosome to late endosome transport	4/50	17/18670	1.05561e-07	9.08211e-07	2.37779e-07	MAPK3/MAPK1/SRC/MAP2K1	4
BP	GO:0001776	leukocyte homeostasis	6/50	86/18670	1.08121e-07	9.20694e-07	2.41048e-07	IL6/CASP3/AKT1/IL2/HIF1A/TGFB1	6
BP	GO:0007260	tyrosine phosphorylation of STAT protein	6/50	86/18670	1.08121e-07	9.20694e-07	2.41048e-07	IL6/STAT3/TNF/IL2/JAK2/IFNG	6
BP	GO:0008625	extrinsic apoptotic signaling pathway via death domain receptors	6/50	86/18670	1.08121e-07	9.20694e-07	2.41048e-07	TNF/BCL2L1/PTEN/CASP8/ICAM1/SERPINE1	6
BP	GO:0090559	regulation of membrane permeability	6/50	86/18670	1.08121e-07	9.20694e-07	2.41048e-07	TP53/STAT3/MAPK8/BCL2L1/MTOR/CASP8	6
BP	GO:0009895	negative regulation of catabolic process	9/50	308/18670	1.11441e-07	9.46532e-07	2.47812e-07	TP53/STAT3/TNF/EGFR/MTOR/AKT1/IL10/MAPK14/IL1B	9
BP	GO:0014002	astrocyte development	5/50	44/18670	1.12603e-07	9.53969e-07	2.49759e-07	IL6/TNF/EGFR/IL1B/IFNG	5
BP	GO:0002690	positive regulation of leukocyte chemotaxis	6/50	87/18670	1.15895e-07	9.79361e-07	2.56407e-07	VEGFA/MAPK3/IL6/CXCL8/MAPK14/SERPINE1	6
BP	GO:0042542	response to hydrogen peroxide	7/50	146/18670	1.16703e-07	9.83682e-07	2.57539e-07	IL6/JUN/CASP3/SRC/IL10/CAT/STAT1	7
BP	GO:0042113	B cell activation	9/50	310/18670	1.17745e-07	9.89952e-07	2.5918e-07	IL6/TP53/CASP3/IL10/CASP8/IL2/CDKN1A/EP300/TGFB1	9
BP	GO:0070663	regulation of leukocyte proliferation	8/50	222/18670	1.23094e-07	1.03231e-06	2.70271e-07	IL6/CASP3/IL10/IL2/ERBB2/CDKN1A/IL1B/TGFB1	8
BP	GO:0097194	execution phase of apoptosis	6/50	88/18670	1.24124e-07	1.03767e-06	2.71674e-07	IL6/TP53/CASP3/BCL2L1/AKT1/CASP8	6
BP	GO:0046879	hormone secretion	9/50	312/18670	1.24358e-07	1.03767e-06	2.71674e-07	IL6/TNF/EGFR/CREB1/JAK2/IL1B/HIF1A/SPP1/IFNG	9
BP	GO:0001558	regulation of cell growth	10/50	416/18670	1.25507e-07	1.04464e-06	2.73497e-07	VEGFA/TP53/EGFR/MTOR/AKT1/IL2/ERBB2/CDKN1A/TGFB1/SPP1	10
BP	GO:0045137	development of primary sexual characteristics	8/50	223/18670	1.27418e-07	1.05789e-06	2.76966e-07	VEGFA/CASP3/SRC/BCL2L1/CCND1/ESR1/ICAM1/AR	8
BP	GO:0032602	chemokine production	6/50	89/18670	1.32828e-07	1.10005e-06	2.88006e-07	IL6/TNF/IL10/IL1B/HIF1A/IFNG	6
BP	GO:0009267	cellular response to starvation	7/50	149/18670	1.34146e-07	1.10545e-06	2.8942e-07	MAPK3/TP53/JUN/MAPK1/MAPK8/MTOR/CDKN1A	7
BP	GO:0051092	positive regulation of NF-kappaB transcription factor activity	7/50	149/18670	1.34146e-07	1.10545e-06	2.8942e-07	STAT3/TNF/CAT/IL1B/ICAM1/TGFB1/AR	7
BP	GO:0033157	regulation of intracellular protein transport	8/50	225/18670	1.36458e-07	1.12173e-06	2.9368e-07	TP53/PTGS2/MAPK1/MAPK14/ERBB2/IL1B/TGFB1/IFNG	8
BP	GO:0035196	production of miRNAs involved in gene silencing by miRNA	5/50	46/18670	1.41557e-07	1.14942e-06	3.0093e-07	TP53/EGFR/MAP2K1/ESR1/TGFB1	5
BP	GO:0060711	labyrinthine layer development	5/50	46/18670	1.41557e-07	1.14942e-06	3.0093e-07	MAPK1/MAP2K1/AKT1/IL10/CASP8	5
BP	GO:0071354	cellular response to interleukin-6	5/50	46/18670	1.41557e-07	1.14942e-06	3.0093e-07	IL6/STAT3/STAT1/JAK2/ICAM1	5
BP	GO:0071675	regulation of mononuclear cell migration	5/50	46/18670	1.41557e-07	1.14942e-06	3.0093e-07	MAPK3/TNF/MAPK14/TGFB1/SERPINE1	5
BP	GO:1990928	response to amino acid starvation	5/50	46/18670	1.41557e-07	1.14942e-06	3.0093e-07	MAPK3/MAPK1/MAPK8/MTOR/CDKN1A	5
BP	GO:0009896	positive regulation of catabolic process	10/50	423/18670	1.46528e-07	1.18688e-06	3.10738e-07	MAPK3/IL6/TNF/EGF/PTEN/AKT1/HSP90AA1/IL1B/HIF1A/IFNG	10
BP	GO:0000187	activation of MAPK activity	7/50	152/18670	1.5374e-07	1.24227e-06	3.25239e-07	MAPK3/TNF/MAPK1/EGF/MAP2K1/MAPK14/IL1B	7
BP	GO:0006953	acute-phase response	5/50	47/18670	1.58091e-07	1.27124e-06	3.32823e-07	IL6/STAT3/TNF/PTGS2/IL1B	5
BP	GO:0070849	response to epidermal growth factor	5/50	47/18670	1.58091e-07	1.27124e-06	3.32823e-07	MAPK3/MAPK1/EGFR/AKT1/ERBB2	5
BP	GO:0045807	positive regulation of endocytosis	7/50	153/18670	1.60786e-07	1.28978e-06	3.37679e-07	VEGFA/TNF/EGF/CCL2/IL1B/SERPINE1/IFNG	7
BP	GO:1904018	positive regulation of vasculature development	8/50	230/18670	1.61508e-07	1.29245e-06	3.38378e-07	VEGFA/STAT3/PTGS2/CXCL8/IL10/IL1B/HIF1A/SERPINE1	8
BP	GO:0009914	hormone transport	9/50	322/18670	1.62518e-07	1.29741e-06	3.39675e-07	IL6/TNF/EGFR/CREB1/JAK2/IL1B/HIF1A/SPP1/IFNG	9
BP	GO:0060252	positive regulation of glial cell proliferation	4/50	19/18670	1.71237e-07	1.36374e-06	3.57042e-07	IL6/TNF/MTOR/IL1B	4
BP	GO:0006476	protein deacetylation	6/50	93/18670	1.72828e-07	1.36984e-06	3.58638e-07	VEGFA/TP53/MAPK8/EP300/TGFB1/IFNG	6
BP	GO:0033273	response to vitamin	6/50	93/18670	1.72828e-07	1.36984e-06	3.58638e-07	PTGS2/EGFR/CCND1/CAT/TGFB1/SPP1	6
BP	GO:0001774	microglial cell activation	5/50	48/18670	1.76119e-07	1.38929e-06	3.63732e-07	IL6/JUN/TNF/JAK2/IFNG	5
BP	GO:0002269	leukocyte activation involved in inflammatory response	5/50	48/18670	1.76119e-07	1.38929e-06	3.63732e-07	IL6/JUN/TNF/JAK2/IFNG	5
BP	GO:0042129	regulation of T cell proliferation	7/50	156/18670	1.8358e-07	1.44471e-06	3.78241e-07	IL6/CASP3/IL10/IL2/ERBB2/IL1B/TGFB1	7
BP	GO:0043271	negative regulation of ion transport	7/50	157/18670	1.91759e-07	1.50551e-06	3.94159e-07	PTGS2/MMP9/MTOR/PTEN/AKT1/ICAM1/TGFB1	7
BP	GO:0030857	negative regulation of epithelial cell differentiation	5/50	49/18670	1.95739e-07	1.53001e-06	4.00573e-07	VEGFA/MMP9/CCND1/STAT1/IFNG	5
BP	GO:0002702	positive regulation of production of molecular mediator of immune response	6/50	95/18670	1.96261e-07	1.53001e-06	4.00573e-07	MAPK3/IL6/MAPK14/IL2/IL1B/TGFB1	6
BP	GO:0042116	macrophage activation	6/50	95/18670	1.96261e-07	1.53001e-06	4.00573e-07	IL6/JUN/TNF/IL10/JAK2/IFNG	6
BP	GO:0008585	female gonad development	6/50	96/18670	2.08922e-07	1.6211e-06	4.24422e-07	VEGFA/CASP3/SRC/BCL2L1/ESR1/ICAM1	6
BP	GO:0048010	vascular endothelial growth factor receptor signaling pathway	6/50	96/18670	2.08922e-07	1.6211e-06	4.24422e-07	VEGFA/SRC/MAPK14/HSP90AA1/IL1B/HIF1A	6
BP	GO:0002374	cytokine secretion involved in immune response	4/50	20/18670	2.13625e-07	1.64605e-06	4.30955e-07	MAPK3/TNF/IL10/MAPK14	4
BP	GO:0051767	nitric-oxide synthase biosynthetic process	4/50	20/18670	2.13625e-07	1.64605e-06	4.30955e-07	CCL2/STAT1/JAK2/IFNG	4
BP	GO:0051769	regulation of nitric-oxide synthase biosynthetic process	4/50	20/18670	2.13625e-07	1.64605e-06	4.30955e-07	CCL2/STAT1/JAK2/IFNG	4
BP	GO:0014009	glial cell proliferation	5/50	50/18670	2.17051e-07	1.66473e-06	4.35844e-07	IL6/TNF/MTOR/CREB1/IL1B	5
BP	GO:0070741	response to interleukin-6	5/50	50/18670	2.17051e-07	1.66473e-06	4.35844e-07	IL6/STAT3/STAT1/JAK2/ICAM1	5
BP	GO:0051251	positive regulation of lymphocyte activation	9/50	334/18670	2.21455e-07	1.69459e-06	4.43662e-07	IL6/SRC/AKT1/IL2/CCL2/CDKN1A/IL1B/TGFB1/IFNG	9
BP	GO:0030217	T cell differentiation	8/50	240/18670	2.23652e-07	1.70747e-06	4.47033e-07	IL6/TP53/STAT3/MTOR/IL2/ERBB2/TGFB1/IFNG	8
BP	GO:1901990	regulation of mitotic cell cycle phase transition	10/50	444/18670	2.29369e-07	1.7471e-06	4.57409e-07	TP53/EGFR/CCND1/PTEN/AKT1/HSP90AA1/CCL2/CDKN1A/EP300/TGFB1	10
BP	GO:0050764	regulation of phagocytosis	6/50	98/18670	2.36263e-07	1.79139e-06	4.69006e-07	TNF/PTEN/CCL2/IL1B/TGFB1/IFNG	6
BP	GO:2001243	negative regulation of intrinsic apoptotic signaling pathway	6/50	98/18670	2.36263e-07	1.79139e-06	4.69006e-07	PTGS2/MMP9/SRC/BCL2L1/AKT1/HIF1A	6
BP	GO:0007566	embryo implantation	5/50	51/18670	2.40161e-07	1.80446e-06	4.72428e-07	PTGS2/MMP9/MMP2/IL1B/SPP1	5
BP	GO:0031050	dsRNA processing	5/50	51/18670	2.40161e-07	1.80446e-06	4.72428e-07	TP53/EGFR/MAP2K1/ESR1/TGFB1	5
BP	GO:0031103	axon regeneration	5/50	51/18670	2.40161e-07	1.80446e-06	4.72428e-07	JUN/PTEN/MAP2K1/JAK2/SPP1	5
BP	GO:0070918	production of small RNA involved in gene silencing by RNA	5/50	51/18670	2.40161e-07	1.80446e-06	4.72428e-07	TP53/EGFR/MAP2K1/ESR1/TGFB1	5
BP	GO:0055024	regulation of cardiac muscle tissue development	6/50	100/18670	2.66479e-07	1.99769e-06	5.23017e-07	MAPK1/MTOR/PTEN/MAPK14/CREB1/TGFB1	6
BP	GO:2001242	regulation of intrinsic apoptotic signaling pathway	7/50	165/18670	2.68975e-07	2.01186e-06	5.26728e-07	TP53/PTGS2/MMP9/SRC/BCL2L1/AKT1/HIF1A	7
BP	GO:0033044	regulation of chromosome organization	9/50	342/18670	2.70381e-07	2.01783e-06	5.28291e-07	VEGFA/MAPK3/TP53/MAPK1/MAPK8/MYC/SRC/IL1B/TGFB1	9
BP	GO:0046545	development of primary female sexual characteristics	6/50	101/18670	2.82736e-07	2.10531e-06	5.51193e-07	VEGFA/CASP3/SRC/BCL2L1/ESR1/ICAM1	6
BP	GO:0010721	negative regulation of cell development	9/50	344/18670	2.8399e-07	2.10991e-06	5.52398e-07	VEGFA/IL6/TP53/STAT3/TNF/PTEN/IL1B/TGFB1/SPP1	9
BP	GO:0000186	activation of MAPKK activity	5/50	53/18670	2.92211e-07	2.16132e-06	5.65856e-07	MAPK3/MAPK1/EGFR/EGF/JAK2	5
BP	GO:0070228	regulation of lymphocyte apoptotic process	5/50	53/18670	2.92211e-07	2.16132e-06	5.65856e-07	TP53/PTEN/IL10/IL2/HIF1A	5
BP	GO:0050806	positive regulation of synaptic transmission	7/50	168/18670	3.03996e-07	2.24349e-06	5.87371e-07	TNF/PTGS2/MAPK1/EGFR/PTEN/CREB1/CCL2	7
BP	GO:0002697	regulation of immune effector process	10/50	458/18670	3.0528e-07	2.24797e-06	5.88542e-07	MAPK3/IL6/TNF/IL10/MAPK14/IL2/STAT1/IL1B/TGFB1/IFNG	10
BP	GO:0035601	protein deacylation	6/50	103/18670	3.17701e-07	2.33426e-06	6.11134e-07	VEGFA/TP53/MAPK8/EP300/TGFB1/IFNG	6
BP	GO:0007178	transmembrane receptor protein serine/threonine kinase signaling pathway	9/50	349/18670	3.20649e-07	2.34059e-06	6.12791e-07	MAPK3/TP53/JUN/SRC/MAPK14/FOS/CREB1/EP300/TGFB1	9
BP	GO:0090312	positive regulation of protein deacetylation	4/50	22/18670	3.21262e-07	2.34059e-06	6.12791e-07	VEGFA/TP53/TGFB1/IFNG	4
BP	GO:1901522	positive regulation of transcription from RNA polymerase II promoter involved in cellular response to chemical stimulus	4/50	22/18670	3.21262e-07	2.34059e-06	6.12791e-07	VEGFA/TP53/EP300/HIF1A	4
BP	GO:0051353	positive regulation of oxidoreductase activity	5/50	54/18670	3.21381e-07	2.34059e-06	6.12791e-07	TNF/AKT1/IL1B/HIF1A/IFNG	5
BP	GO:0008630	intrinsic apoptotic signaling pathway in response to DNA damage	6/50	104/18670	3.36471e-07	2.43446e-06	6.37369e-07	TP53/TNF/BCL2L1/CASP9/CDKN1A/EP300	6
BP	GO:0019233	sensory perception of pain	6/50	104/18670	3.36471e-07	2.43446e-06	6.37369e-07	MAPK3/PTGS2/MAPK1/MTOR/IL10/CCL2	6
BP	GO:0098732	macromolecule deacylation	6/50	104/18670	3.36471e-07	2.43446e-06	6.37369e-07	VEGFA/TP53/MAPK8/EP300/TGFB1/IFNG	6
BP	GO:0016241	regulation of macroautophagy	7/50	171/18670	3.42782e-07	2.47474e-06	6.47913e-07	MAPK3/TP53/CASP3/MAPK8/MTOR/AKT1/HIF1A	7
BP	GO:0001541	ovarian follicle development	5/50	55/18670	3.5281e-07	2.53611e-06	6.6398e-07	VEGFA/SRC/BCL2L1/ESR1/ICAM1	5
BP	GO:0042306	regulation of protein import into nucleus	5/50	55/18670	3.5281e-07	2.53611e-06	6.6398e-07	PTGS2/MAPK1/MAPK14/TGFB1/IFNG	5
BP	GO:0001659	temperature homeostasis	7/50	173/18670	3.70889e-07	2.64886e-06	6.93501e-07	VEGFA/STAT3/TNF/PTGS2/JAK2/IL1B/IGF1R	7
BP	GO:0003018	vascular process in circulatory system	7/50	173/18670	3.70889e-07	2.64886e-06	6.93501e-07	VEGFA/PTGS2/EGFR/SRC/AKT1/ICAM1/TGFB1	7
BP	GO:0010469	regulation of signaling receptor activity	7/50	173/18670	3.70889e-07	2.64886e-06	6.93501e-07	EGF/SRC/PTEN/IL10/CCL2/SERPINE1/IFNG	7
BP	GO:0007409	axonogenesis	10/50	468/18670	3.72248e-07	2.65287e-06	6.94549e-07	VEGFA/MAPK3/MAPK1/SRC/PTEN/MAP2K1/CREB1/HSP90AA1/ERBB2/SPP1	10
BP	GO:0060688	regulation of morphogenesis of a branching structure	5/50	56/18670	3.86621e-07	2.74352e-06	7.18284e-07	VEGFA/TNF/ESR1/TGFB1/AR	5
BP	GO:0090183	regulation of kidney development	5/50	56/18670	3.86621e-07	2.74352e-06	7.18284e-07	VEGFA/MMP9/MYC/STAT1/TGFB1	5
BP	GO:0051043	regulation of membrane protein ectodomain proteolysis	4/50	23/18670	3.8813e-07	2.74836e-06	7.1955e-07	TNF/IL10/IL1B/IFNG	4
BP	GO:0043525	positive regulation of neuron apoptotic process	5/50	57/18670	4.22945e-07	2.98851e-06	7.82425e-07	TP53/JUN/TNF/CASP3/CASP9	5
BP	GO:0002460	adaptive immune response based on somatic recombination of immune receptors built from immunoglobulin superfamily domains	9/50	361/18670	4.25859e-07	3.00271e-06	7.86142e-07	IL6/STAT3/TNF/MTOR/IL10/IL2/IL1B/ICAM1/TGFB1	9
BP	GO:0001959	regulation of cytokine-mediated signaling pathway	7/50	177/18670	4.32954e-07	3.04627e-06	7.97546e-07	IL6/TNF/CASP8/STAT1/JAK2/HIF1A/IFNG	7
BP	GO:0032722	positive regulation of chemokine production	5/50	58/18670	4.61916e-07	3.22274e-06	8.43748e-07	IL6/TNF/IL1B/HIF1A/IFNG	5
BP	GO:0035306	positive regulation of dephosphorylation	5/50	58/18670	4.61916e-07	3.22274e-06	8.43748e-07	SRC/MTOR/JAK2/TGFB1/IFNG	5
BP	GO:1902041	regulation of extrinsic apoptotic signaling pathway via death domain receptors	5/50	58/18670	4.61916e-07	3.22274e-06	8.43748e-07	BCL2L1/PTEN/CASP8/ICAM1/SERPINE1	5
BP	GO:1904589	regulation of protein import	5/50	58/18670	4.61916e-07	3.22274e-06	8.43748e-07	PTGS2/MAPK1/MAPK14/TGFB1/IFNG	5
BP	GO:0046697	decidualization	4/50	24/18670	4.64839e-07	3.2252e-06	8.44392e-07	MAPK3/PTGS2/MAPK1/SPP1	4
BP	GO:1903649	regulation of cytoplasmic transport	4/50	24/18670	4.64839e-07	3.2252e-06	8.44392e-07	MAPK3/MAPK1/SRC/MAP2K1	4
BP	GO:0071347	cellular response to interleukin-1	7/50	179/18670	4.67125e-07	3.2252e-06	8.44392e-07	MAPK3/IL6/CXCL8/CCL2/IL1B/ICAM1/HIF1A	7
BP	GO:1903034	regulation of response to wounding	7/50	179/18670	4.67125e-07	3.2252e-06	8.44392e-07	MTOR/PTEN/MAP2K1/IL10/CDKN1A/SERPINE1/SPP1	7
BP	GO:2001235	positive regulation of apoptotic signaling pathway	7/50	179/18670	4.67125e-07	3.2252e-06	8.44392e-07	TP53/MAPK8/MMP9/BCL2L1/PTEN/CASP8/JAK2	7
BP	GO:1901987	regulation of cell cycle phase transition	10/50	480/18670	4.69384e-07	3.23408e-06	8.46717e-07	TP53/EGFR/CCND1/PTEN/AKT1/HSP90AA1/CCL2/CDKN1A/EP300/TGFB1	10
BP	GO:0046883	regulation of hormone secretion	8/50	266/18670	4.8894e-07	3.36184e-06	8.80167e-07	TNF/EGFR/CREB1/JAK2/IL1B/HIF1A/SPP1/IFNG	8
BP	GO:0034248	regulation of cellular amide metabolic process	10/50	483/18670	4.96895e-07	3.40948e-06	8.92638e-07	MAPK3/IL6/STAT3/TNF/MAPK1/CASP3/MTOR/AKT1/ERBB2/IFNG	10
BP	GO:0030198	extracellular matrix organization	9/50	368/18670	5.00141e-07	3.42467e-06	8.96617e-07	IL6/TNF/MMP9/MMP2/ICAM1/TGFB1/MMP1/SERPINE1/SPP1	9
BP	GO:0001836	release of cytochrome c from mitochondria	5/50	59/18670	5.03673e-07	3.42766e-06	8.97399e-07	TP53/JUN/MMP9/BCL2L1/AKT1	5
BP	GO:0031102	neuron projection regeneration	5/50	59/18670	5.03673e-07	3.42766e-06	8.97399e-07	JUN/PTEN/MAP2K1/JAK2/SPP1	5
BP	GO:0033619	membrane protein proteolysis	5/50	59/18670	5.03673e-07	3.42766e-06	8.97399e-07	TNF/IL10/IL1B/TGFB1/IFNG	5
BP	GO:0010821	regulation of mitochondrion organization	7/50	182/18670	5.2262e-07	3.54933e-06	9.29252e-07	TP53/MAPK8/MMP9/BCL2L1/AKT1/CASP8/HIF1A	7
BP	GO:0007548	sex differentiation	8/50	270/18670	5.474e-07	3.70896e-06	9.71045e-07	VEGFA/CASP3/SRC/BCL2L1/CCND1/ESR1/ICAM1/AR	8
BP	GO:0002294	CD4-positive, alpha-beta T cell differentiation involved in immune response	5/50	60/18670	5.48358e-07	3.70896e-06	9.71045e-07	IL6/STAT3/MTOR/IL2/IFNG	5
BP	GO:0060964	regulation of gene silencing by miRNA	6/50	113/18670	5.5014e-07	3.71286e-06	9.72067e-07	TP53/STAT3/EGFR/MAP2K1/ESR1/TGFB1	6
BP	GO:0045672	positive regulation of osteoclast differentiation	4/50	25/18670	5.52289e-07	3.71286e-06	9.72067e-07	TNF/FOS/CREB1/IFNG	4
BP	GO:0060444	branching involved in mammary gland duct morphogenesis	4/50	25/18670	5.52289e-07	3.71286e-06	9.72067e-07	SRC/ESR1/TGFB1/AR	4
BP	GO:0002287	alpha-beta T cell activation involved in immune response	5/50	61/18670	5.9612e-07	3.99136e-06	1.04498e-06	IL6/STAT3/MTOR/IL2/IFNG	5
BP	GO:0002293	alpha-beta T cell differentiation involved in immune response	5/50	61/18670	5.9612e-07	3.99136e-06	1.04498e-06	IL6/STAT3/MTOR/IL2/IFNG	5
BP	GO:0032963	collagen metabolic process	6/50	115/18670	6.10194e-07	4.06919e-06	1.06536e-06	IL6/MMP9/MMP2/HIF1A/TGFB1/MMP1	6
BP	GO:0046660	female sex differentiation	6/50	115/18670	6.10194e-07	4.06919e-06	1.06536e-06	VEGFA/CASP3/SRC/BCL2L1/ESR1/ICAM1	6
BP	GO:0002260	lymphocyte homeostasis	5/50	62/18670	6.47109e-07	4.2981e-06	1.12529e-06	CASP3/AKT1/IL2/HIF1A/TGFB1	5
BP	GO:0055025	positive regulation of cardiac muscle tissue development	5/50	62/18670	6.47109e-07	4.2981e-06	1.12529e-06	MAPK1/MTOR/MAPK14/CREB1/TGFB1	5
BP	GO:0006367	transcription initiation from RNA polymerase II promoter	7/50	188/18670	6.50365e-07	4.30949e-06	1.12827e-06	TP53/CCND1/PTEN/ESR1/CREB1/CDKN1A/AR	7
BP	GO:0002360	T cell lineage commitment	4/50	26/18670	6.5142e-07	4.30949e-06	1.12827e-06	IL6/TP53/STAT3/MTOR	4
BP	GO:0042176	regulation of protein catabolic process	9/50	381/18670	6.683e-07	4.41238e-06	1.15521e-06	TNF/EGFR/EGF/PTEN/AKT1/IL10/HSP90AA1/IL1B/IFNG	9
BP	GO:0060147	regulation of posttranscriptional gene silencing	6/50	117/18670	6.75521e-07	4.44238e-06	1.16306e-06	TP53/STAT3/EGFR/MAP2K1/ESR1/TGFB1	6
BP	GO:0060966	regulation of gene silencing by RNA	6/50	117/18670	6.75521e-07	4.44238e-06	1.16306e-06	TP53/STAT3/EGFR/MAP2K1/ESR1/TGFB1	6
BP	GO:0060759	regulation of response to cytokine stimulus	7/50	190/18670	6.98382e-07	4.58365e-06	1.20005e-06	IL6/TNF/CASP8/STAT1/JAK2/HIF1A/IFNG	7
BP	GO:0002637	regulation of immunoglobulin production	5/50	63/18670	7.01483e-07	4.59492e-06	1.203e-06	IL6/TNF/IL10/IL2/TGFB1	5
BP	GO:0042594	response to starvation	7/50	191/18670	7.23485e-07	4.72971e-06	1.23829e-06	MAPK3/TP53/JUN/MAPK1/MAPK8/MTOR/CDKN1A	7
BP	GO:0007173	epidermal growth factor receptor signaling pathway	6/50	119/18670	7.46472e-07	4.8704e-06	1.27512e-06	MMP9/EGFR/EGF/SRC/AKT1/TGFB1	6
BP	GO:0045670	regulation of osteoclast differentiation	5/50	64/18670	7.59403e-07	4.94506e-06	1.29467e-06	TNF/MTOR/FOS/CREB1/IFNG	5
BP	GO:0046885	regulation of hormone biosynthetic process	4/50	27/18670	7.63204e-07	4.95039e-06	1.29607e-06	TNF/IL1B/HIF1A/IFNG	4
BP	GO:2000144	positive regulation of DNA-templated transcription, initiation	4/50	27/18670	7.63204e-07	4.95039e-06	1.29607e-06	TP53/JUN/ESR1/CREB1	4
BP	GO:0022612	gland morphogenesis	6/50	120/18670	7.84172e-07	5.07648e-06	1.32908e-06	TNF/EGFR/SRC/ESR1/TGFB1/AR	6
BP	GO:0014706	striated muscle tissue development	9/50	390/18670	8.11658e-07	5.2442e-06	1.37299e-06	VEGFA/MAPK1/MTOR/PTEN/MAPK14/FOS/CREB1/EP300/TGFB1	9
BP	GO:0072577	endothelial cell apoptotic process	5/50	65/18670	8.21035e-07	5.29448e-06	1.38615e-06	TNF/IL10/CCL2/ICAM1/SERPINE1	5
BP	GO:0002440	production of molecular mediator of immune response	8/50	286/18670	8.45069e-07	5.4389e-06	1.42396e-06	MAPK3/IL6/TNF/IL10/MAPK14/IL2/IL1B/TGFB1	8
BP	GO:0071897	DNA biosynthetic process	7/50	196/18670	8.60679e-07	5.52865e-06	1.44746e-06	MAPK3/TP53/MAPK1/MYC/SRC/HSP90AA1/CDKN1A	7
BP	GO:0046890	regulation of lipid biosynthetic process	7/50	198/18670	9.21357e-07	5.907e-06	1.54652e-06	TNF/PTGS2/MTOR/AKT1/CREB1/IL1B/IFNG	7
BP	GO:0014013	regulation of gliogenesis	6/50	124/18670	9.5092e-07	6.08479e-06	1.59306e-06	IL6/TNF/MTOR/CREB1/IL1B/TGFB1	6
BP	GO:0007179	transforming growth factor beta receptor signaling pathway	7/50	199/18670	9.53018e-07	6.08648e-06	1.59351e-06	TP53/JUN/SRC/FOS/CREB1/EP300/TGFB1	7
BP	GO:2000573	positive regulation of DNA biosynthetic process	5/50	67/18670	9.56123e-07	6.09459e-06	1.59563e-06	MAPK3/MAPK1/MYC/SRC/HSP90AA1	5
BP	GO:2000134	negative regulation of G1/S transition of mitotic cell cycle	6/50	125/18670	9.96847e-07	6.34201e-06	1.66041e-06	TP53/CCND1/PTEN/CCL2/CDKN1A/EP300	6
BP	GO:0031063	regulation of histone deacetylation	4/50	29/18670	1.0288e-06	6.50268e-06	1.70247e-06	VEGFA/TP53/MAPK8/TGFB1	4
BP	GO:0070102	interleukin-6-mediated signaling pathway	4/50	29/18670	1.0288e-06	6.50268e-06	1.70247e-06	IL6/STAT3/STAT1/JAK2	4
BP	GO:0002292	T cell differentiation involved in immune response	5/50	68/18670	1.02993e-06	6.50268e-06	1.70247e-06	IL6/STAT3/MTOR/IL2/IFNG	5
BP	GO:0071230	cellular response to amino acid stimulus	5/50	68/18670	1.02993e-06	6.50268e-06	1.70247e-06	TNF/EGFR/BCL2L1/MTOR/MMP2	5
BP	GO:0009746	response to hexose	7/50	202/18670	1.05353e-06	6.63906e-06	1.73818e-06	PTGS2/CASP3/PTEN/IGF1R/ICAM1/HIF1A/TGFB1	7
BP	GO:0016236	macroautophagy	8/50	295/18670	1.06656e-06	6.69573e-06	1.75302e-06	MAPK3/TP53/CASP3/MAPK8/SRC/MTOR/AKT1/HIF1A	8
BP	GO:0050768	negative regulation of neurogenesis	8/50	295/18670	1.06656e-06	6.69573e-06	1.75302e-06	IL6/TP53/STAT3/TNF/PTEN/IL1B/TGFB1/SPP1	8
BP	GO:0030278	regulation of ossification	7/50	203/18670	1.08895e-06	6.82342e-06	1.78645e-06	MAPK3/IL6/TNF/MAPK1/MAPK14/HIF1A/TGFB1	7
BP	GO:0035270	endocrine system development	6/50	127/18670	1.09415e-06	6.83024e-06	1.78823e-06	MAPK3/IL6/MAPK1/MAP2K1/AKT1/CREB1	6
BP	GO:0045727	positive regulation of translation	6/50	127/18670	1.09415e-06	6.83024e-06	1.78823e-06	MAPK3/IL6/TNF/MAPK1/MTOR/ERBB2	6
BP	GO:0035265	organ growth	7/50	204/18670	1.12537e-06	7.01191e-06	1.83579e-06	MAPK1/MTOR/PTEN/AKT1/MAPK14/ESR1/AR	7
BP	GO:0060537	muscle tissue development	9/50	408/18670	1.18002e-06	7.33867e-06	1.92134e-06	VEGFA/MAPK1/MTOR/PTEN/MAPK14/FOS/CREB1/EP300/TGFB1	9
BP	GO:0071549	cellular response to dexamethasone stimulus	4/50	30/18670	1.18474e-06	7.34055e-06	1.92184e-06	EGFR/CASP9/ICAM1/TGFB1	4
BP	GO:0097421	liver regeneration	4/50	30/18670	1.18474e-06	7.34055e-06	1.92184e-06	EGFR/CCND1/IL10/TGFB1	4
BP	GO:0071482	cellular response to light stimulus	6/50	129/18670	1.1991e-06	7.40188e-06	1.93789e-06	TP53/PTGS2/MYC/CASP9/CDKN1A/EP300	6
BP	GO:1903038	negative regulation of leukocyte cell-cell adhesion	6/50	129/18670	1.1991e-06	7.40188e-06	1.93789e-06	CASP3/AKT1/IL10/IL2/ERBB2/TGFB1	6
BP	GO:0019216	regulation of lipid metabolic process	9/50	410/18670	1.22872e-06	7.57068e-06	1.98208e-06	TNF/PTGS2/SRC/MTOR/AKT1/CREB1/IL1B/TGFB1/IFNG	9
BP	GO:0071479	cellular response to ionizing radiation	5/50	71/18670	1.27867e-06	7.86383e-06	2.05884e-06	TP53/BCL2L1/MAPK14/CDKN1A/TGFB1	5
BP	GO:1902807	negative regulation of cell cycle G1/S phase transition	6/50	131/18670	1.31214e-06	8.05476e-06	2.10882e-06	TP53/CCND1/PTEN/CCL2/CDKN1A/EP300	6
BP	GO:0006006	glucose metabolic process	7/50	209/18670	1.32314e-06	8.09235e-06	2.11866e-06	TP53/TNF/SRC/MTOR/AKT1/MAPK14/EP300	7
BP	GO:0051701	interaction with host	7/50	209/18670	1.32314e-06	8.09235e-06	2.11866e-06	EGFR/SRC/BCL2L1/CXCL8/CASP8/ICAM1/TGFB1	7
BP	GO:0002675	positive regulation of acute inflammatory response	4/50	31/18670	1.35758e-06	8.24229e-06	2.15792e-06	IL6/TNF/PTGS2/IL1B	4
BP	GO:0010165	response to X-ray	4/50	31/18670	1.35758e-06	8.24229e-06	2.15792e-06	TP53/CASP3/CCND1/CDKN1A	4
BP	GO:0045648	positive regulation of erythrocyte differentiation	4/50	31/18670	1.35758e-06	8.24229e-06	2.15792e-06	STAT3/MAPK14/STAT1/HIF1A	4
BP	GO:0045737	positive regulation of cyclin-dependent protein serine/threonine kinase activity	4/50	31/18670	1.35758e-06	8.24229e-06	2.15792e-06	EGFR/SRC/CCND1/AKT1	4
BP	GO:0050707	regulation of cytokine secretion	7/50	210/18670	1.366e-06	8.27824e-06	2.16733e-06	MAPK3/TNF/SRC/IL10/MAPK14/IL1B/IFNG	7
BP	GO:0031100	animal organ regeneration	5/50	73/18670	1.46922e-06	8.85529e-06	2.31841e-06	EGFR/CCND1/IL10/CDKN1A/TGFB1	5
BP	GO:0032945	negative regulation of mononuclear cell proliferation	5/50	73/18670	1.46922e-06	8.85529e-06	2.31841e-06	CASP3/IL10/IL2/ERBB2/TGFB1	5
BP	GO:0050672	negative regulation of lymphocyte proliferation	5/50	73/18670	1.46922e-06	8.85529e-06	2.31841e-06	CASP3/IL10/IL2/ERBB2/TGFB1	5
BP	GO:0007006	mitochondrial membrane organization	6/50	134/18670	1.49793e-06	8.97945e-06	2.35092e-06	TP53/STAT3/MAPK8/BCL2L1/CASP8/HSP90AA1	6
BP	GO:0046683	response to organophosphorus	6/50	134/18670	1.49793e-06	8.97945e-06	2.35092e-06	JUN/PTGS2/PTEN/FOS/STAT1/IL1B	6
BP	GO:0048565	digestive tract development	6/50	134/18670	1.49793e-06	8.97945e-06	2.35092e-06	TNF/EGFR/CXCL8/CDKN1A/HIF1A/TGFB1	6
BP	GO:0045907	positive regulation of vasoconstriction	4/50	32/18670	1.54847e-06	9.23715e-06	2.41838e-06	PTGS2/EGFR/AKT1/ICAM1	4
BP	GO:0051385	response to mineralocorticoid	4/50	32/18670	1.54847e-06	9.23715e-06	2.41838e-06	SRC/CCND1/FOS/CDKN1A	4
BP	GO:0045732	positive regulation of protein catabolic process	7/50	214/18670	1.54926e-06	9.23715e-06	2.41838e-06	TNF/EGF/PTEN/AKT1/HSP90AA1/IL1B/IFNG	7
BP	GO:0043062	extracellular structure organization	9/50	422/18670	1.55913e-06	9.27932e-06	2.42943e-06	IL6/TNF/MMP9/MMP2/ICAM1/TGFB1/MMP1/SERPINE1/SPP1	9
BP	GO:0014015	positive regulation of gliogenesis	5/50	74/18670	1.57252e-06	9.32559e-06	2.44154e-06	IL6/TNF/MTOR/IL1B/TGFB1	5
BP	GO:0043367	CD4-positive, alpha-beta T cell differentiation	5/50	74/18670	1.57252e-06	9.32559e-06	2.44154e-06	IL6/STAT3/MTOR/IL2/IFNG	5
BP	GO:0000075	cell cycle checkpoint	7/50	216/18670	1.64835e-06	9.75787e-06	2.55471e-06	TP53/BCL2L1/CCND1/MAPK14/CDKN1A/EP300/TGFB1	7
BP	GO:0043393	regulation of protein binding	7/50	217/18670	1.69985e-06	1.00448e-05	2.62985e-06	MAPK3/MAPK8/MMP9/SRC/AKT1/IL10/EP300	7
BP	GO:0051961	negative regulation of nervous system development	8/50	315/18670	1.742e-06	1.02757e-05	2.69028e-06	IL6/TP53/STAT3/TNF/PTEN/IL1B/TGFB1/SPP1	8
BP	GO:0060603	mammary gland duct morphogenesis	4/50	33/18670	1.75858e-06	1.03367e-05	2.70626e-06	SRC/ESR1/TGFB1/AR	4
BP	GO:1902692	regulation of neuroblast proliferation	4/50	33/18670	1.75858e-06	1.03367e-05	2.70626e-06	VEGFA/TP53/HIF1A/TGFB1	4
BP	GO:0046902	regulation of mitochondrial membrane permeability	5/50	76/18670	1.79626e-06	1.05395e-05	2.75936e-06	TP53/STAT3/MAPK8/BCL2L1/CASP8	5
BP	GO:0048678	response to axon injury	5/50	77/18670	1.91714e-06	1.1229e-05	2.93987e-06	JUN/PTEN/MAP2K1/JAK2/SPP1	5
BP	GO:0001837	epithelial to mesenchymal transition	6/50	140/18670	1.93418e-06	1.13088e-05	2.96078e-06	IL6/MTOR/PTEN/IL1B/HIF1A/TGFB1	6
BP	GO:0032660	regulation of interleukin-17 production	4/50	34/18670	1.98913e-06	1.16097e-05	3.03954e-06	IL6/IL2/TGFB1/IFNG	4
BP	GO:0070664	negative regulation of leukocyte proliferation	5/50	78/18670	2.04434e-06	1.1911e-05	3.11842e-06	CASP3/IL10/IL2/ERBB2/TGFB1	5
BP	GO:0010675	regulation of cellular carbohydrate metabolic process	6/50	142/18670	2.10075e-06	1.22182e-05	3.19886e-06	TP53/STAT3/SRC/MTOR/AKT1/EP300	6
BP	GO:0001660	fever generation	3/50	10/18670	2.14033e-06	1.23403e-05	3.23083e-06	TNF/PTGS2/IL1B	3
BP	GO:0032025	response to cobalt ion	3/50	10/18670	2.14033e-06	1.23403e-05	3.23083e-06	CASP3/CASP9/CASP8	3
BP	GO:0045348	positive regulation of MHC class II biosynthetic process	3/50	10/18670	2.14033e-06	1.23403e-05	3.23083e-06	IL10/JAK2/IFNG	3
BP	GO:0045792	negative regulation of cell size	3/50	10/18670	2.14033e-06	1.23403e-05	3.23083e-06	MTOR/PTEN/AKT1	3
BP	GO:1903799	negative regulation of production of miRNAs involved in gene silencing by miRNA	3/50	10/18670	2.14033e-06	1.23403e-05	3.23083e-06	TP53/ESR1/TGFB1	3
BP	GO:0043536	positive regulation of blood vessel endothelial cell migration	5/50	79/18670	2.17809e-06	1.25146e-05	3.27646e-06	VEGFA/PTGS2/AKT1/HIF1A/TGFB1	5
BP	GO:1900034	regulation of cellular response to heat	5/50	79/18670	2.17809e-06	1.25146e-05	3.27646e-06	MAPK3/MAPK1/MTOR/HSP90AA1/EP300	5
BP	GO:0031056	regulation of histone modification	6/50	143/18670	2.18832e-06	1.25517e-05	3.28617e-06	VEGFA/MAPK3/TP53/MAPK8/IL1B/TGFB1	6
BP	GO:1905332	positive regulation of morphogenesis of an epithelium	4/50	35/18670	2.24137e-06	1.28338e-05	3.36002e-06	VEGFA/MTOR/TGFB1/AR	4
BP	GO:0009615	response to virus	8/50	326/18670	2.24905e-06	1.28556e-05	3.36573e-06	IL6/TNF/SRC/BCL2L1/MAPK14/STAT1/IL1B/IFNG	8
BP	GO:0022617	extracellular matrix disassembly	5/50	80/18670	2.31863e-06	1.32306e-05	3.4639e-06	IL6/MMP9/MMP2/TGFB1/MMP1	5
BP	GO:0002822	regulation of adaptive immune response based on somatic recombination of immune receptors built from immunoglobulin superfamily domains	6/50	145/18670	2.37241e-06	1.34911e-05	3.53211e-06	IL6/TNF/IL10/IL2/IL1B/TGFB1	6
BP	GO:0007612	learning	6/50	145/18670	2.37241e-06	1.34911e-05	3.53211e-06	JUN/PTGS2/MTOR/FOS/CREB1/HIF1A	6
BP	GO:0014855	striated muscle cell proliferation	5/50	81/18670	2.46622e-06	1.39691e-05	3.65725e-06	STAT3/MAPK1/PTEN/MAPK14/JAK2	5
BP	GO:0035264	multicellular organism growth	6/50	146/18670	2.46909e-06	1.39691e-05	3.65725e-06	TP53/STAT3/MTOR/CREB1/EP300/AR	6
BP	GO:0055123	digestive system development	6/50	146/18670	2.46909e-06	1.39691e-05	3.65725e-06	TNF/EGFR/CXCL8/CDKN1A/HIF1A/TGFB1	6
BP	GO:0051973	positive regulation of telomerase activity	4/50	36/18670	2.51658e-06	1.41653e-05	3.70864e-06	MAPK3/MAPK1/MYC/HSP90AA1	4
BP	GO:1901099	negative regulation of signal transduction in absence of ligand	4/50	36/18670	2.51658e-06	1.41653e-05	3.70864e-06	TNF/BCL2L1/AKT1/IL1B	4
BP	GO:2001240	negative regulation of extrinsic apoptotic signaling pathway in absence of ligand	4/50	36/18670	2.51658e-06	1.41653e-05	3.70864e-06	TNF/BCL2L1/AKT1/IL1B	4
BP	GO:0048738	cardiac muscle tissue development	7/50	233/18670	2.72622e-06	1.53194e-05	4.01079e-06	VEGFA/MAPK1/MTOR/PTEN/MAPK14/CREB1/TGFB1	7
BP	GO:0002706	regulation of lymphocyte mediated immunity	6/50	149/18670	2.77857e-06	1.55101e-05	4.06072e-06	IL6/TNF/IL10/IL2/IL1B/TGFB1	6
BP	GO:0014074	response to purine-containing compound	6/50	149/18670	2.77857e-06	1.55101e-05	4.06072e-06	JUN/PTGS2/PTEN/FOS/STAT1/IL1B	6
BP	GO:0006970	response to osmotic stress	5/50	83/18670	2.78351e-06	1.55101e-05	4.06072e-06	TP53/TNF/PTGS2/CASP3/EGFR	5
BP	GO:0045913	positive regulation of carbohydrate metabolic process	5/50	83/18670	2.78351e-06	1.55101e-05	4.06072e-06	EGF/SRC/AKT1/HIF1A/IFNG	5
BP	GO:2000106	regulation of leukocyte apoptotic process	5/50	83/18670	2.78351e-06	1.55101e-05	4.06072e-06	TP53/PTEN/IL10/IL2/HIF1A	5
BP	GO:0030212	hyaluronan metabolic process	4/50	37/18670	2.81606e-06	1.5561e-05	4.07403e-06	EGF/AKT1/IL1B/TGFB1	4
BP	GO:0032885	regulation of polysaccharide biosynthetic process	4/50	37/18670	2.81606e-06	1.5561e-05	4.07403e-06	EGF/MTOR/AKT1/TGFB1	4
BP	GO:0034405	response to fluid shear stress	4/50	37/18670	2.81606e-06	1.5561e-05	4.07403e-06	PTGS2/SRC/AKT1/TGFB1	4
BP	GO:0043029	T cell homeostasis	4/50	37/18670	2.81606e-06	1.5561e-05	4.07403e-06	CASP3/AKT1/IL2/TGFB1	4
BP	GO:2000142	regulation of DNA-templated transcription, initiation	4/50	37/18670	2.81606e-06	1.5561e-05	4.07403e-06	TP53/JUN/ESR1/CREB1	4
BP	GO:0006469	negative regulation of protein kinase activity	7/50	235/18670	2.88487e-06	1.59147e-05	4.16664e-06	CASP3/PTEN/AKT1/CDKN1A/IL1B/IGF1R/IFNG	7
BP	GO:0031652	positive regulation of heat generation	3/50	11/18670	2.9374e-06	1.60182e-05	4.19375e-06	TNF/PTGS2/IL1B	3
BP	GO:0045899	positive regulation of RNA polymerase II transcriptional preinitiation complex assembly	3/50	11/18670	2.9374e-06	1.60182e-05	4.19375e-06	TP53/ESR1/CREB1	3
BP	GO:0060439	trachea morphogenesis	3/50	11/18670	2.9374e-06	1.60182e-05	4.19375e-06	MAPK3/MAPK1/MAP2K1	3
BP	GO:0060736	prostate gland growth	3/50	11/18670	2.9374e-06	1.60182e-05	4.19375e-06	PTEN/ESR1/AR	3
BP	GO:0070106	interleukin-27-mediated signaling pathway	3/50	11/18670	2.9374e-06	1.60182e-05	4.19375e-06	STAT3/STAT1/JAK2	3
BP	GO:0070757	interleukin-35-mediated signaling pathway	3/50	11/18670	2.9374e-06	1.60182e-05	4.19375e-06	STAT3/STAT1/JAK2	3
BP	GO:0072584	caveolin-mediated endocytosis	3/50	11/18670	2.9374e-06	1.60182e-05	4.19375e-06	MAPK3/MAPK1/SRC	3
BP	GO:0010507	negative regulation of autophagy	5/50	84/18670	2.95374e-06	1.60546e-05	4.20327e-06	TP53/STAT3/MTOR/AKT1/IL10	5
BP	GO:0043154	negative regulation of cysteine-type endopeptidase activity involved in apoptotic process	5/50	84/18670	2.95374e-06	1.60546e-05	4.20327e-06	VEGFA/PTGS2/MMP9/SRC/AKT1	5
BP	GO:0016202	regulation of striated muscle tissue development	6/50	152/18670	3.11899e-06	1.69251e-05	4.43117e-06	MAPK1/MTOR/PTEN/MAPK14/CREB1/TGFB1	6
BP	GO:0032350	regulation of hormone metabolic process	4/50	38/18670	3.14116e-06	1.69623e-05	4.44091e-06	TNF/IL1B/HIF1A/IFNG	4
BP	GO:0032620	interleukin-17 production	4/50	38/18670	3.14116e-06	1.69623e-05	4.44091e-06	IL6/IL2/TGFB1/IFNG	4
BP	GO:0045022	early endosome to late endosome transport	4/50	38/18670	3.14116e-06	1.69623e-05	4.44091e-06	MAPK3/MAPK1/SRC/MAP2K1	4
BP	GO:0023061	signal release	9/50	462/18670	3.27573e-06	1.76602e-05	4.62364e-06	IL6/TNF/EGFR/CREB1/JAK2/IL1B/HIF1A/SPP1/IFNG	9
BP	GO:0050663	cytokine secretion	7/50	240/18670	3.31556e-06	1.78341e-05	4.66915e-06	MAPK3/TNF/SRC/IL10/MAPK14/IL1B/IFNG	7
BP	GO:0070542	response to fatty acid	5/50	86/18670	3.31871e-06	1.78341e-05	4.66915e-06	PTGS2/SRC/AKT1/CAT/CREB1	5
BP	GO:0002683	negative regulation of immune system process	9/50	463/18670	3.33398e-06	1.78872e-05	4.68305e-06	TNF/CASP3/MYC/AKT1/IL10/IL2/CCL2/ERBB2/TGFB1	9
BP	GO:0038093	Fc receptor signaling pathway	7/50	241/18670	3.40784e-06	1.82539e-05	4.77908e-06	MAPK3/JUN/MAPK1/MAPK8/SRC/FOS/HSP90AA1	7
BP	GO:0060968	regulation of gene silencing	6/50	155/18670	3.49265e-06	1.86214e-05	4.87528e-06	TP53/STAT3/EGFR/MAP2K1/ESR1/TGFB1	6
BP	GO:1901861	regulation of muscle tissue development	6/50	155/18670	3.49265e-06	1.86214e-05	4.87528e-06	MAPK1/MTOR/PTEN/MAPK14/CREB1/TGFB1	6
BP	GO:1902042	negative regulation of extrinsic apoptotic signaling pathway via death domain receptors	4/50	39/18670	3.49326e-06	1.86214e-05	4.87528e-06	BCL2L1/CASP8/ICAM1/SERPINE1	4
BP	GO:0014068	positive regulation of phosphatidylinositol 3-kinase signaling	5/50	87/18670	3.51401e-06	1.86422e-05	4.88073e-06	TNF/SRC/CAT/JAK2/IGF1R	5
BP	GO:0045844	positive regulation of striated muscle tissue development	5/50	87/18670	3.51401e-06	1.86422e-05	4.88073e-06	MAPK1/MTOR/MAPK14/CREB1/TGFB1	5
BP	GO:0048636	positive regulation of muscle organ development	5/50	87/18670	3.51401e-06	1.86422e-05	4.88073e-06	MAPK1/MTOR/MAPK14/CREB1/TGFB1	5
BP	GO:0048634	regulation of muscle organ development	6/50	156/18670	3.62502e-06	1.92005e-05	5.02689e-06	MAPK1/MTOR/PTEN/MAPK14/CREB1/TGFB1	6
BP	GO:1901863	positive regulation of muscle tissue development	5/50	88/18670	3.71822e-06	1.96315e-05	5.13973e-06	MAPK1/MTOR/MAPK14/CREB1/TGFB1	5
BP	GO:2000177	regulation of neural precursor cell proliferation	5/50	88/18670	3.71822e-06	1.96315e-05	5.13973e-06	VEGFA/TP53/EGF/HIF1A/TGFB1	5
BP	GO:1905952	regulation of lipid localization	6/50	157/18670	3.76144e-06	1.98282e-05	5.19122e-06	IL6/TNF/EGF/AKT1/IL1B/SPP1	6
BP	GO:0045124	regulation of bone resorption	4/50	40/18670	3.87376e-06	2.03556e-05	5.32932e-06	IL6/EGFR/SRC/SPP1	4
BP	GO:0071548	response to dexamethasone	4/50	40/18670	3.87376e-06	2.03556e-05	5.32932e-06	EGFR/CASP9/ICAM1/TGFB1	4
BP	GO:0043467	regulation of generation of precursor metabolites and energy	6/50	158/18670	3.90201e-06	2.04445e-05	5.35259e-06	TP53/STAT3/MTOR/AKT1/HIF1A/IFNG	6
BP	GO:0042368	vitamin D biosynthetic process	3/50	12/18670	3.90914e-06	2.04445e-05	5.35259e-06	TNF/IL1B/IFNG	3
BP	GO:0045080	positive regulation of chemokine biosynthetic process	3/50	12/18670	3.90914e-06	2.04445e-05	5.35259e-06	TNF/IL1B/IFNG	3
BP	GO:0097237	cellular response to toxic substance	7/50	247/18670	4.00773e-06	2.09272e-05	5.47896e-06	IL6/TNF/PTGS2/SRC/PTEN/IL10/CAT	7
BP	GO:0010717	regulation of epithelial to mesenchymal transition	5/50	90/18670	4.15455e-06	2.1592e-05	5.65301e-06	IL6/MTOR/PTEN/IL1B/TGFB1	5
BP	GO:0031058	positive regulation of histone modification	5/50	90/18670	4.15455e-06	2.1592e-05	5.65301e-06	VEGFA/MAPK3/TP53/IL1B/TGFB1	5
BP	GO:0046849	bone remodeling	5/50	90/18670	4.15455e-06	2.1592e-05	5.65301e-06	IL6/EGFR/SRC/TGFB1/SPP1	5
BP	GO:0002819	regulation of adaptive immune response	6/50	160/18670	4.196e-06	2.17733e-05	5.70049e-06	IL6/TNF/IL10/IL2/IL1B/TGFB1	6
BP	GO:0019318	hexose metabolic process	7/50	249/18670	4.22628e-06	2.18621e-05	5.72374e-06	TP53/TNF/SRC/MTOR/AKT1/MAPK14/EP300	7
BP	GO:0071560	cellular response to transforming growth factor beta stimulus	7/50	249/18670	4.22628e-06	2.18621e-05	5.72374e-06	TP53/JUN/SRC/FOS/CREB1/EP300/TGFB1	7
BP	GO:0061028	establishment of endothelial barrier	4/50	41/18670	4.28409e-06	2.20924e-05	5.78402e-06	VEGFA/TNF/IL1B/ICAM1	4
BP	GO:0098927	vesicle-mediated transport between endosomal compartments	4/50	41/18670	4.28409e-06	2.20924e-05	5.78402e-06	MAPK3/MAPK1/SRC/MAP2K1	4
BP	GO:0030072	peptide hormone secretion	7/50	250/18670	4.33923e-06	2.2342e-05	5.84938e-06	IL6/TNF/EGFR/JAK2/IL1B/HIF1A/IFNG	7
BP	GO:0060333	interferon-gamma-mediated signaling pathway	5/50	91/18670	4.38727e-06	2.25544e-05	5.90498e-06	TP53/STAT1/JAK2/ICAM1/IFNG	5
BP	GO:0035710	CD4-positive, alpha-beta T cell activation	5/50	92/18670	4.6301e-06	2.37293e-05	6.21258e-06	IL6/STAT3/MTOR/IL2/IFNG	5
BP	GO:2000117	negative regulation of cysteine-type endopeptidase activity	5/50	92/18670	4.6301e-06	2.37293e-05	6.21258e-06	VEGFA/PTGS2/MMP9/SRC/AKT1	5
BP	GO:0045931	positive regulation of mitotic cell cycle	6/50	163/18670	4.67059e-06	2.38999e-05	6.25725e-06	EGFR/EGF/CCND1/AKT1/IL1B/TGFB1	6
BP	GO:2000027	regulation of animal organ morphogenesis	7/50	253/18670	4.69331e-06	2.39792e-05	6.27801e-06	VEGFA/TNF/MYC/ESR1/STAT1/TGFB1/AR	7
BP	GO:0006509	membrane protein ectodomain proteolysis	4/50	42/18670	4.72573e-06	2.41078e-05	6.31167e-06	TNF/IL10/IL1B/IFNG	4
BP	GO:0035821	modification of morphology or physiology of other organism	6/50	164/18670	4.83815e-06	2.46434e-05	6.45191e-06	JUN/BCL2L1/CASP8/EP300/TGFB1/IFNG	6
BP	GO:1901184	regulation of ERBB signaling pathway	5/50	93/18670	4.88336e-06	2.48356e-05	6.50222e-06	MMP9/EGFR/EGF/AKT1/ERBB2	5
BP	GO:0071559	response to transforming growth factor beta	7/50	255/18670	4.94249e-06	2.50978e-05	6.57089e-06	TP53/JUN/SRC/FOS/CREB1/EP300/TGFB1	7
BP	GO:0045861	negative regulation of proteolysis	8/50	363/18670	4.97691e-06	2.52341e-05	6.60655e-06	VEGFA/TP53/PTGS2/MMP9/SRC/AKT1/IL10/SERPINE1	8
BP	GO:0007093	mitotic cell cycle checkpoint	6/50	165/18670	5.01058e-06	2.53274e-05	6.63099e-06	TP53/BCL2L1/CCND1/CDKN1A/EP300/TGFB1	6
BP	GO:0050680	negative regulation of epithelial cell proliferation	6/50	165/18670	5.01058e-06	2.53274e-05	6.63099e-06	TNF/PTEN/CCL2/STAT1/TGFB1/AR	6
BP	GO:0010870	positive regulation of receptor biosynthetic process	3/50	13/18670	5.07229e-06	2.54074e-05	6.65193e-06	JAK2/HIF1A/IFNG	3
BP	GO:0030656	regulation of vitamin metabolic process	3/50	13/18670	5.07229e-06	2.54074e-05	6.65193e-06	TNF/IL1B/IFNG	3
BP	GO:0031650	regulation of heat generation	3/50	13/18670	5.07229e-06	2.54074e-05	6.65193e-06	TNF/PTGS2/IL1B	3
BP	GO:0090399	replicative senescence	3/50	13/18670	5.07229e-06	2.54074e-05	6.65193e-06	TP53/CDKN1A/SERPINE1	3
BP	GO:1901550	regulation of endothelial cell development	3/50	13/18670	5.07229e-06	2.54074e-05	6.65193e-06	VEGFA/TNF/IL1B	3
BP	GO:1903140	regulation of establishment of endothelial barrier	3/50	13/18670	5.07229e-06	2.54074e-05	6.65193e-06	VEGFA/TNF/IL1B	3
BP	GO:0032459	regulation of protein oligomerization	4/50	43/18670	5.20016e-06	2.59427e-05	6.79208e-06	TP53/SRC/EP300/MMP1	4
BP	GO:0032881	regulation of polysaccharide metabolic process	4/50	43/18670	5.20016e-06	2.59427e-05	6.79208e-06	EGF/MTOR/AKT1/TGFB1	4
BP	GO:0033673	negative regulation of kinase activity	7/50	257/18670	5.2026e-06	2.59427e-05	6.79208e-06	CASP3/PTEN/AKT1/CDKN1A/IL1B/IGF1R/IFNG	7
BP	GO:0035051	cardiocyte differentiation	6/50	167/18670	5.37042e-06	2.67394e-05	7.00066e-06	VEGFA/MAPK3/MAPK1/EGFR/MTOR/TGFB1	6
BP	GO:0051302	regulation of cell division	6/50	168/18670	5.55807e-06	2.76323e-05	7.23442e-06	VEGFA/MYC/BCL2L1/CAT/IL1B/TGFB1	6
BP	GO:0072659	protein localization to plasma membrane	7/50	260/18670	5.6141e-06	2.78691e-05	7.29643e-06	TNF/EGFR/BCL2L1/AKT1/TGFB1/IFNG/AR	7
BP	GO:0030225	macrophage differentiation	4/50	44/18670	5.70892e-06	2.82975e-05	7.40859e-06	VEGFA/MMP9/CASP8/TGFB1	4
BP	GO:0030307	positive regulation of cell growth	6/50	169/18670	5.75101e-06	2.84213e-05	7.441e-06	VEGFA/EGFR/MTOR/AKT1/IL2/ERBB2	6
BP	GO:0051100	negative regulation of binding	6/50	169/18670	5.75101e-06	2.84213e-05	7.441e-06	MAPK3/JUN/MAPK8/AKT1/IL10/JAK2	6
BP	GO:0043255	regulation of carbohydrate biosynthetic process	5/50	97/18670	6.00705e-06	2.96425e-05	7.76074e-06	EGF/MTOR/AKT1/EP300/TGFB1	5
BP	GO:0030213	hyaluronan biosynthetic process	3/50	14/18670	6.44347e-06	3.14688e-05	8.23886e-06	EGF/IL1B/TGFB1	3
BP	GO:0045346	regulation of MHC class II biosynthetic process	3/50	14/18670	6.44347e-06	3.14688e-05	8.23886e-06	IL10/JAK2/IFNG	3
BP	GO:0045591	positive regulation of regulatory T cell differentiation	3/50	14/18670	6.44347e-06	3.14688e-05	8.23886e-06	IL2/TGFB1/IFNG	3
BP	GO:0048308	organelle inheritance	3/50	14/18670	6.44347e-06	3.14688e-05	8.23886e-06	MAPK3/MAPK1/MAP2K1	3
BP	GO:0048313	Golgi inheritance	3/50	14/18670	6.44347e-06	3.14688e-05	8.23886e-06	MAPK3/MAPK1/MAP2K1	3
BP	GO:0051547	regulation of keratinocyte migration	3/50	14/18670	6.44347e-06	3.14688e-05	8.23886e-06	MMP9/MTOR/PTEN	3
BP	GO:1905050	positive regulation of metallopeptidase activity	3/50	14/18670	6.44347e-06	3.14688e-05	8.23886e-06	MAPK3/STAT3/MAPK14	3
BP	GO:2001252	positive regulation of chromosome organization	6/50	174/18670	6.79919e-06	3.31573e-05	8.68093e-06	VEGFA/MAPK3/TP53/MAPK1/IL1B/TGFB1	6
BP	GO:0060443	mammary gland morphogenesis	4/50	46/18670	6.83565e-06	3.32862e-05	8.71469e-06	SRC/ESR1/TGFB1/AR	4
BP	GO:0002824	positive regulation of adaptive immune response based on somatic recombination of immune receptors built from immunoglobulin superfamily domains	5/50	100/18670	6.97543e-06	3.39172e-05	8.87988e-06	IL6/TNF/IL2/IL1B/TGFB1	5
BP	GO:0046632	alpha-beta T cell differentiation	5/50	101/18670	7.32401e-06	3.556e-05	9.30999e-06	IL6/STAT3/MTOR/IL2/IFNG	5
BP	GO:0045646	regulation of erythrocyte differentiation	4/50	47/18670	7.45682e-06	3.60993e-05	9.45117e-06	STAT3/MAPK14/STAT1/HIF1A	4
BP	GO:2001239	regulation of extrinsic apoptotic signaling pathway in absence of ligand	4/50	47/18670	7.45682e-06	3.60993e-05	9.45117e-06	TNF/BCL2L1/AKT1/IL1B	4
BP	GO:0010950	positive regulation of endopeptidase activity	6/50	178/18670	7.74507e-06	3.73857e-05	9.78799e-06	STAT3/TNF/MYC/CASP9/CASP8/JAK2	6
BP	GO:0050821	protein stabilization	6/50	178/18670	7.74507e-06	3.73857e-05	9.78799e-06	TP53/PTEN/CREB1/HSP90AA1/CDKN1A/EP300	6
BP	GO:0008361	regulation of cell size	6/50	179/18670	7.99748e-06	3.83581e-05	1.00426e-05	VEGFA/MTOR/PTEN/AKT1/CREB1/SPP1	6
BP	GO:0051099	positive regulation of binding	6/50	179/18670	7.99748e-06	3.83581e-05	1.00426e-05	MMP9/EGF/JAK2/EP300/TGFB1/IFNG	6
BP	GO:0042362	fat-soluble vitamin biosynthetic process	3/50	15/18670	8.03914e-06	3.83581e-05	1.00426e-05	TNF/IL1B/IFNG	3
BP	GO:0045342	MHC class II biosynthetic process	3/50	15/18670	8.03914e-06	3.83581e-05	1.00426e-05	IL10/JAK2/IFNG	3
BP	GO:0045410	positive regulation of interleukin-6 biosynthetic process	3/50	15/18670	8.03914e-06	3.83581e-05	1.00426e-05	STAT3/TNF/IL1B	3
BP	GO:0045898	regulation of RNA polymerase II transcriptional preinitiation complex assembly	3/50	15/18670	8.03914e-06	3.83581e-05	1.00426e-05	TP53/ESR1/CREB1	3
BP	GO:0051044	positive regulation of membrane protein ectodomain proteolysis	3/50	15/18670	8.03914e-06	3.83581e-05	1.00426e-05	TNF/IL1B/IFNG	3
BP	GO:1903358	regulation of Golgi organization	3/50	15/18670	8.03914e-06	3.83581e-05	1.00426e-05	MAPK3/MAPK1/MAP2K1	3
BP	GO:0034766	negative regulation of ion transmembrane transport	5/50	103/18670	8.06202e-06	3.83581e-05	1.00426e-05	MMP9/MTOR/PTEN/AKT1/TGFB1	5
BP	GO:1905269	positive regulation of chromatin organization	5/50	103/18670	8.06202e-06	3.83581e-05	1.00426e-05	VEGFA/MAPK3/TP53/IL1B/TGFB1	5
BP	GO:0007595	lactation	4/50	48/18670	8.1187e-06	3.84077e-05	1.00555e-05	VEGFA/CCND1/CREB1/HIF1A	4
BP	GO:0045912	negative regulation of carbohydrate metabolic process	4/50	48/18670	8.1187e-06	3.84077e-05	1.00555e-05	TP53/STAT3/EP300/TGFB1	4
BP	GO:0046850	regulation of bone remodeling	4/50	48/18670	8.1187e-06	3.84077e-05	1.00555e-05	IL6/EGFR/SRC/SPP1	4
BP	GO:0090199	regulation of release of cytochrome c from mitochondria	4/50	48/18670	8.1187e-06	3.84077e-05	1.00555e-05	TP53/MMP9/BCL2L1/AKT1	4
BP	GO:0071346	cellular response to interferon-gamma	6/50	180/18670	8.25653e-06	3.90042e-05	1.02117e-05	TP53/CCL2/STAT1/JAK2/ICAM1/IFNG	6
BP	GO:0001822	kidney development	7/50	278/18670	8.69475e-06	4.1016e-05	1.07384e-05	VEGFA/MMP9/MYC/CAT/CASP9/STAT1/TGFB1	7
BP	GO:0035094	response to nicotine	4/50	49/18670	8.82296e-06	4.14868e-05	1.08617e-05	TNF/MAPK1/CASP3/CREB1	4
BP	GO:0051205	protein insertion into membrane	4/50	49/18670	8.82296e-06	4.14868e-05	1.08617e-05	TP53/MAPK8/EGFR/CASP8	4
BP	GO:0002708	positive regulation of lymphocyte mediated immunity	5/50	105/18670	8.85701e-06	4.14868e-05	1.08617e-05	IL6/TNF/IL2/IL1B/TGFB1	5
BP	GO:0002821	positive regulation of adaptive immune response	5/50	105/18670	8.85701e-06	4.14868e-05	1.08617e-05	IL6/TNF/IL2/IL1B/TGFB1	5
BP	GO:0008593	regulation of Notch signaling pathway	5/50	105/18670	8.85701e-06	4.14868e-05	1.08617e-05	STAT3/EGFR/EGF/AKT1/EP300	5
BP	GO:0010959	regulation of metal ion transport	8/50	394/18670	9.06101e-06	4.23826e-05	1.10962e-05	PTGS2/EGF/PTEN/AKT1/CCL2/ICAM1/TGFB1/IFNG	8
BP	GO:0030522	intracellular receptor signaling pathway	7/50	280/18670	9.11022e-06	4.25528e-05	1.11408e-05	STAT3/SRC/ESR1/CASP8/JAK2/EP300/AR	7
BP	GO:0048639	positive regulation of developmental growth	6/50	184/18670	9.36175e-06	4.3605e-05	1.14163e-05	VEGFA/MAPK1/MTOR/AKT1/MAPK14/CREB1	6
BP	GO:0050864	regulation of B cell activation	6/50	184/18670	9.36175e-06	4.3605e-05	1.14163e-05	IL6/CASP3/IL10/IL2/CDKN1A/TGFB1	6
BP	GO:0010718	positive regulation of epithelial to mesenchymal transition	4/50	50/18670	9.5713e-06	4.44563e-05	1.16392e-05	IL6/MTOR/IL1B/TGFB1	4
BP	GO:0060425	lung morphogenesis	4/50	50/18670	9.5713e-06	4.44563e-05	1.16392e-05	MAPK3/TNF/MAPK1/MAP2K1	4
BP	GO:1902275	regulation of chromatin organization	6/50	185/18670	9.65599e-06	4.47871e-05	1.17257e-05	VEGFA/MAPK3/TP53/MAPK8/IL1B/TGFB1	6
BP	GO:0062014	negative regulation of small molecule metabolic process	5/50	107/18670	9.71204e-06	4.49842e-05	1.17774e-05	TP53/STAT3/AKT1/EP300/TGFB1	5
BP	GO:0016579	protein deubiquitination	7/50	283/18670	9.76426e-06	4.51631e-05	1.18242e-05	TP53/MYC/PTEN/ESR1/EP300/HIF1A/AR	7
BP	GO:0002295	T-helper cell lineage commitment	3/50	16/18670	9.87566e-06	4.53625e-05	1.18764e-05	IL6/STAT3/MTOR	3
BP	GO:0034116	positive regulation of heterotypic cell-cell adhesion	3/50	16/18670	9.87566e-06	4.53625e-05	1.18764e-05	TNF/IL10/IL1B	3
BP	GO:0060965	negative regulation of gene silencing by miRNA	3/50	16/18670	9.87566e-06	4.53625e-05	1.18764e-05	TP53/ESR1/TGFB1	3
BP	GO:0090335	regulation of brown fat cell differentiation	3/50	16/18670	9.87566e-06	4.53625e-05	1.18764e-05	PTGS2/MTOR/MAPK14	3
BP	GO:1902004	positive regulation of amyloid-beta formation	3/50	16/18670	9.87566e-06	4.53625e-05	1.18764e-05	TNF/CASP3/IFNG	3
BP	GO:0071156	regulation of cell cycle arrest	5/50	108/18670	1.01631e-05	4.66182e-05	1.22051e-05	TP53/CCND1/CDKN1A/EP300/TGFB1	5
BP	GO:0015980	energy derivation by oxidation of organic compounds	7/50	285/18670	1.02216e-05	4.67574e-05	1.22416e-05	TP53/MYC/MTOR/AKT1/CAT/HIF1A/IFNG	7
BP	GO:0034976	response to endoplasmic reticulum stress	7/50	285/18670	1.02216e-05	4.67574e-05	1.22416e-05	TP53/JUN/BCL2L1/CXCL8/CCND1/CCL2/EP300	7
BP	GO:0002712	regulation of B cell mediated immunity	4/50	51/18670	1.03654e-05	4.72852e-05	1.23798e-05	TNF/IL10/IL2/TGFB1	4
BP	GO:0002889	regulation of immunoglobulin mediated immune response	4/50	51/18670	1.03654e-05	4.72852e-05	1.23798e-05	TNF/IL10/IL2/TGFB1	4
BP	GO:0044262	cellular carbohydrate metabolic process	7/50	286/18670	1.04568e-05	4.76367e-05	1.24718e-05	TP53/STAT3/SRC/MTOR/PTEN/AKT1/EP300	7
BP	GO:0043900	regulation of multi-organism process	8/50	405/18670	1.10675e-05	5.03497e-05	1.31821e-05	MAPK3/JUN/TNF/CXCL8/STAT1/IL1B/EP300/IFNG	8
BP	GO:0005996	monosaccharide metabolic process	7/50	292/18670	1.19648e-05	5.4008e-05	1.41399e-05	TP53/TNF/SRC/MTOR/AKT1/MAPK14/EP300	7
BP	GO:0031649	heat generation	3/50	17/18670	1.19693e-05	5.4008e-05	1.41399e-05	TNF/PTGS2/IL1B	3
BP	GO:0032740	positive regulation of interleukin-17 production	3/50	17/18670	1.19693e-05	5.4008e-05	1.41399e-05	IL6/IL2/TGFB1	3
BP	GO:0043373	CD4-positive, alpha-beta T cell lineage commitment	3/50	17/18670	1.19693e-05	5.4008e-05	1.41399e-05	IL6/STAT3/MTOR	3
BP	GO:1905331	negative regulation of morphogenesis of an epithelium	3/50	17/18670	1.19693e-05	5.4008e-05	1.41399e-05	TNF/PTEN/STAT1	3
BP	GO:2001267	regulation of cysteine-type endopeptidase activity involved in apoptotic signaling pathway	3/50	17/18670	1.19693e-05	5.4008e-05	1.41399e-05	MMP9/CASP8/JAK2	3
BP	GO:0007517	muscle organ development	8/50	410/18670	1.20967e-05	5.45091e-05	1.42711e-05	MAPK1/MTOR/PTEN/MAPK14/FOS/CREB1/EP300/TGFB1	8
BP	GO:0050868	negative regulation of T cell activation	5/50	112/18670	1.21334e-05	5.45266e-05	1.42757e-05	CASP3/IL10/IL2/ERBB2/TGFB1	5
BP	GO:0051817	modification of morphology or physiology of other organism involved in symbiotic interaction	5/50	112/18670	1.21334e-05	5.45266e-05	1.42757e-05	JUN/BCL2L1/CASP8/EP300/TGFB1	5
BP	GO:0072001	renal system development	7/50	293/18670	1.22328e-05	5.4899e-05	1.43731e-05	VEGFA/MMP9/MYC/CAT/CASP9/STAT1/TGFB1	7
BP	GO:0046620	regulation of organ growth	5/50	113/18670	1.26697e-05	5.67828e-05	1.48664e-05	MAPK1/MTOR/PTEN/AKT1/MAPK14	5
BP	GO:0002720	positive regulation of cytokine production involved in immune response	4/50	54/18670	1.30403e-05	5.8208e-05	1.52395e-05	MAPK3/IL6/MAPK14/IL1B	4
BP	GO:0050994	regulation of lipid catabolic process	4/50	54/18670	1.30403e-05	5.8208e-05	1.52395e-05	TNF/MTOR/AKT1/IL1B	4
BP	GO:1904645	response to amyloid-beta	4/50	54/18670	1.30403e-05	5.8208e-05	1.52395e-05	MMP9/MMP2/IGF1R/ICAM1	4
BP	GO:0032612	interleukin-1 production	5/50	115/18670	1.37977e-05	6.14801e-05	1.60961e-05	IL10/CASP8/JAK2/IL1B/IFNG	5
BP	GO:0009749	response to glucose	6/50	197/18670	1.38103e-05	6.14801e-05	1.60961e-05	CASP3/PTEN/IGF1R/ICAM1/HIF1A/TGFB1	6
BP	GO:0070646	protein modification by small protein removal	7/50	299/18670	1.39478e-05	6.20091e-05	1.62347e-05	TP53/MYC/PTEN/ESR1/EP300/HIF1A/AR	7
BP	GO:0002902	regulation of B cell apoptotic process	3/50	18/18670	1.4336e-05	6.3311e-05	1.65755e-05	PTEN/IL10/IL2	3
BP	GO:0031065	positive regulation of histone deacetylation	3/50	18/18670	1.4336e-05	6.3311e-05	1.65755e-05	VEGFA/TP53/TGFB1	3
BP	GO:0035994	response to muscle stretch	3/50	18/18670	1.4336e-05	6.3311e-05	1.65755e-05	JUN/MAPK14/FOS	3
BP	GO:0051023	regulation of immunoglobulin secretion	3/50	18/18670	1.4336e-05	6.3311e-05	1.65755e-05	IL6/TNF/IL2	3
BP	GO:0150078	positive regulation of neuroinflammatory response	3/50	18/18670	1.4336e-05	6.3311e-05	1.65755e-05	IL6/TNF/IL1B	3
BP	GO:0034341	response to interferon-gamma	6/50	199/18670	1.46254e-05	6.4503e-05	1.68876e-05	TP53/CCL2/STAT1/JAK2/ICAM1/IFNG	6
BP	GO:0010822	positive regulation of mitochondrion organization	5/50	117/18670	1.50025e-05	6.59912e-05	1.72772e-05	TP53/MAPK8/MMP9/CASP8/HIF1A	5
BP	GO:0010906	regulation of glucose metabolic process	5/50	117/18670	1.50025e-05	6.59912e-05	1.72772e-05	TP53/SRC/MTOR/AKT1/EP300	5
BP	GO:0010332	response to gamma radiation	4/50	56/18670	1.50853e-05	6.618e-05	1.73266e-05	TP53/MYC/BCL2L1/CDKN1A	4
BP	GO:1903078	positive regulation of protein localization to plasma membrane	4/50	56/18670	1.50853e-05	6.618e-05	1.73266e-05	TNF/EGFR/AKT1/IFNG	4
BP	GO:0006417	regulation of translation	8/50	424/18670	1.54182e-05	6.75514e-05	1.76857e-05	MAPK3/IL6/STAT3/TNF/MAPK1/MTOR/AKT1/ERBB2	8
BP	GO:0002703	regulation of leukocyte mediated immunity	6/50	201/18670	1.54788e-05	6.77275e-05	1.77318e-05	IL6/TNF/IL10/IL2/IL1B/TGFB1	6
BP	GO:0048008	platelet-derived growth factor receptor signaling pathway	4/50	57/18670	1.61919e-05	7.07542e-05	1.85242e-05	VEGFA/SRC/PTEN/JAK2	4
BP	GO:0002363	alpha-beta T cell lineage commitment	3/50	19/18670	1.69919e-05	7.36686e-05	1.92872e-05	IL6/STAT3/MTOR	3
BP	GO:0030949	positive regulation of vascular endothelial growth factor receptor signaling pathway	3/50	19/18670	1.69919e-05	7.36686e-05	1.92872e-05	VEGFA/IL1B/HIF1A	3
BP	GO:0051546	keratinocyte migration	3/50	19/18670	1.69919e-05	7.36686e-05	1.92872e-05	MMP9/MTOR/PTEN	3
BP	GO:0060149	negative regulation of posttranscriptional gene silencing	3/50	19/18670	1.69919e-05	7.36686e-05	1.92872e-05	TP53/ESR1/TGFB1	3
BP	GO:0060438	trachea development	3/50	19/18670	1.69919e-05	7.36686e-05	1.92872e-05	MAPK3/MAPK1/MAP2K1	3
BP	GO:0060967	negative regulation of gene silencing by RNA	3/50	19/18670	1.69919e-05	7.36686e-05	1.92872e-05	TP53/ESR1/TGFB1	3
BP	GO:0019229	regulation of vasoconstriction	4/50	58/18670	1.73571e-05	7.49581e-05	1.96248e-05	PTGS2/EGFR/AKT1/ICAM1	4
BP	GO:0042093	T-helper cell differentiation	4/50	58/18670	1.73571e-05	7.49581e-05	1.96248e-05	IL6/STAT3/MTOR/IL2	4
BP	GO:0071385	cellular response to glucocorticoid stimulus	4/50	58/18670	1.73571e-05	7.49581e-05	1.96248e-05	EGFR/CASP9/ICAM1/TGFB1	4
BP	GO:0043618	regulation of transcription from RNA polymerase II promoter in response to stress	5/50	121/18670	1.76576e-05	7.61571e-05	1.99388e-05	VEGFA/TP53/JUN/EP300/HIF1A	5
BP	GO:1990778	protein localization to cell periphery	7/50	311/18670	1.79791e-05	7.74429e-05	2.02754e-05	TNF/EGFR/BCL2L1/AKT1/TGFB1/IFNG/AR	7
BP	GO:0001885	endothelial cell development	4/50	59/18670	1.85828e-05	7.9733e-05	2.0875e-05	VEGFA/TNF/IL1B/ICAM1	4
BP	GO:0042130	negative regulation of T cell proliferation	4/50	59/18670	1.85828e-05	7.9733e-05	2.0875e-05	CASP3/IL10/ERBB2/TGFB1	4
BP	GO:2000351	regulation of endothelial cell apoptotic process	4/50	59/18670	1.85828e-05	7.9733e-05	2.0875e-05	TNF/CCL2/ICAM1/SERPINE1	4
BP	GO:0090276	regulation of peptide hormone secretion	6/50	208/18670	1.87889e-05	8.05133e-05	2.10792e-05	TNF/EGFR/JAK2/IL1B/HIF1A/IFNG	6
BP	GO:0071621	granulocyte chemotaxis	5/50	123/18670	1.91155e-05	8.18074e-05	2.14181e-05	MAPK3/CXCL8/MAPK14/CCL2/IL1B	5
BP	GO:0035303	regulation of dephosphorylation	6/50	209/18670	1.93051e-05	8.25125e-05	2.16027e-05	TNF/SRC/MTOR/JAK2/TGFB1/IFNG	6
BP	GO:0030220	platelet formation	3/50	20/18670	1.99528e-05	8.4844e-05	2.22131e-05	CASP3/CASP9/EP300	3
BP	GO:0043369	CD4-positive or CD8-positive, alpha-beta T cell lineage commitment	3/50	20/18670	1.99528e-05	8.4844e-05	2.22131e-05	IL6/STAT3/MTOR	3
BP	GO:0060261	positive regulation of transcription initiation from RNA polymerase II promoter	3/50	20/18670	1.99528e-05	8.4844e-05	2.22131e-05	TP53/ESR1/CREB1	3
BP	GO:1902993	positive regulation of amyloid precursor protein catabolic process	3/50	20/18670	1.99528e-05	8.4844e-05	2.22131e-05	TNF/CASP3/IFNG	3
BP	GO:0007405	neuroblast proliferation	4/50	61/18670	2.12235e-05	8.96735e-05	2.34775e-05	VEGFA/TP53/HIF1A/TGFB1	4
BP	GO:0030888	regulation of B cell proliferation	4/50	61/18670	2.12235e-05	8.96735e-05	2.34775e-05	CASP3/IL10/IL2/CDKN1A	4
BP	GO:0048645	animal organ formation	4/50	61/18670	2.12235e-05	8.96735e-05	2.34775e-05	MAPK3/MAPK1/MAP2K1/AR	4
BP	GO:0071384	cellular response to corticosteroid stimulus	4/50	61/18670	2.12235e-05	8.96735e-05	2.34775e-05	EGFR/CASP9/ICAM1/TGFB1	4
BP	GO:1905953	negative regulation of lipid localization	4/50	61/18670	2.12235e-05	8.96735e-05	2.34775e-05	IL6/TNF/EGF/AKT1	4
BP	GO:0007254	JNK cascade	6/50	214/18670	2.20609e-05	9.30931e-05	2.43728e-05	TNF/MAPK8/EGFR/AKT1/IL1B/IGF1R	6
BP	GO:0043620	regulation of DNA-templated transcription in response to stress	5/50	127/18670	2.23116e-05	9.40313e-05	2.46184e-05	VEGFA/TP53/JUN/EP300/HIF1A	5
BP	GO:0045453	bone resorption	4/50	62/18670	2.26426e-05	9.53056e-05	2.4952e-05	IL6/EGFR/SRC/SPP1	4
BP	GO:0010595	positive regulation of endothelial cell migration	5/50	128/18670	2.3172e-05	9.71167e-05	2.54262e-05	VEGFA/PTGS2/AKT1/HIF1A/TGFB1	5
BP	GO:0010893	positive regulation of steroid biosynthetic process	3/50	21/18670	2.32343e-05	9.71167e-05	2.54262e-05	TNF/IL1B/IFNG	3
BP	GO:0036344	platelet morphogenesis	3/50	21/18670	2.32343e-05	9.71167e-05	2.54262e-05	CASP3/CASP9/EP300	3
BP	GO:0051412	response to corticosterone	3/50	21/18670	2.32343e-05	9.71167e-05	2.54262e-05	CCND1/FOS/CDKN1A	3
BP	GO:1903392	negative regulation of adherens junction organization	3/50	21/18670	2.32343e-05	9.71167e-05	2.54262e-05	VEGFA/SRC/PTEN	3
BP	GO:0032869	cellular response to insulin stimulus	6/50	216/18670	2.32484e-05	9.71167e-05	2.54262e-05	SRC/PTEN/AKT1/STAT1/IL1B/IGF1R	6
BP	GO:0031571	mitotic G1 DNA damage checkpoint	4/50	63/18670	2.41301e-05	0.000100296	2.62585e-05	TP53/CCND1/CDKN1A/EP300	4
BP	GO:0044819	mitotic G1/S transition checkpoint	4/50	63/18670	2.41301e-05	0.000100296	2.62585e-05	TP53/CCND1/CDKN1A/EP300	4
BP	GO:0046622	positive regulation of organ growth	4/50	63/18670	2.41301e-05	0.000100296	2.62585e-05	MAPK1/MTOR/AKT1/MAPK14	4
BP	GO:1904377	positive regulation of protein localization to cell periphery	4/50	63/18670	2.41301e-05	0.000100296	2.62585e-05	TNF/EGFR/AKT1/IFNG	4
BP	GO:0016570	histone modification	8/50	454/18670	2.51854e-05	0.000104551	2.73725e-05	VEGFA/MAPK3/TP53/MAPK8/JAK2/IL1B/EP300/TGFB1	8
BP	GO:0044783	G1 DNA damage checkpoint	4/50	64/18670	2.56882e-05	0.00010624	2.78147e-05	TP53/CCND1/CDKN1A/EP300	4
BP	GO:0045600	positive regulation of fat cell differentiation	4/50	64/18670	2.56882e-05	0.00010624	2.78147e-05	PTGS2/AKT1/MAPK14/CREB1	4
BP	GO:2000378	negative regulation of reactive oxygen species metabolic process	4/50	64/18670	2.56882e-05	0.00010624	2.78147e-05	TP53/STAT3/IL10/HIF1A	4
BP	GO:0002526	acute inflammatory response	6/50	220/18670	2.57779e-05	0.000106478	2.78772e-05	IL6/STAT3/TNF/PTGS2/IL1B/ICAM1	6
BP	GO:0046887	positive regulation of hormone secretion	5/50	131/18670	2.59089e-05	0.000106886	2.7984e-05	EGFR/CREB1/JAK2/HIF1A/SPP1	5
BP	GO:0010869	regulation of receptor biosynthetic process	3/50	22/18670	2.68522e-05	0.000109511	2.86712e-05	JAK2/HIF1A/IFNG	3
BP	GO:0030878	thyroid gland development	3/50	22/18670	2.68522e-05	0.000109511	2.86712e-05	MAPK3/MAPK1/MAP2K1	3
BP	GO:0031281	positive regulation of cyclase activity	3/50	22/18670	2.68522e-05	0.000109511	2.86712e-05	MAPK3/MAPK8/MAPK14	3
BP	GO:0042359	vitamin D metabolic process	3/50	22/18670	2.68522e-05	0.000109511	2.86712e-05	TNF/IL1B/IFNG	3
BP	GO:0044321	response to leptin	3/50	22/18670	2.68522e-05	0.000109511	2.86712e-05	STAT3/CCND1/PTEN	3
BP	GO:0048305	immunoglobulin secretion	3/50	22/18670	2.68522e-05	0.000109511	2.86712e-05	IL6/TNF/IL2	3
BP	GO:0051000	positive regulation of nitric-oxide synthase activity	3/50	22/18670	2.68522e-05	0.000109511	2.86712e-05	TNF/AKT1/HIF1A	3
BP	GO:0030518	intracellular steroid hormone receptor signaling pathway	5/50	132/18670	2.68749e-05	0.000109511	2.86712e-05	SRC/ESR1/JAK2/EP300/AR	5
BP	GO:0042552	myelination	5/50	132/18670	2.68749e-05	0.000109511	2.86712e-05	MTOR/PTEN/AKT1/ERBB2/TGFB1	5
BP	GO:0043280	positive regulation of cysteine-type endopeptidase activity involved in apoptotic process	5/50	132/18670	2.68749e-05	0.000109511	2.86712e-05	TNF/MYC/CASP9/CASP8/JAK2	5
BP	GO:0002705	positive regulation of leukocyte mediated immunity	5/50	133/18670	2.78687e-05	0.000113283	2.96587e-05	IL6/TNF/IL2/IL1B/TGFB1	5
BP	GO:0042770	signal transduction in response to DNA damage	5/50	133/18670	2.78687e-05	0.000113283	2.96587e-05	TP53/MAPK14/CASP9/CDKN1A/EP300	5
BP	GO:0046394	carboxylic acid biosynthetic process	8/50	462/18670	2.85288e-05	0.000115824	3.0324e-05	TP53/STAT3/PTGS2/EGF/IL1B/HIF1A/TGFB1/IFNG	8
BP	GO:0007272	ensheathment of neurons	5/50	134/18670	2.88909e-05	0.000117008	3.06339e-05	MTOR/PTEN/AKT1/ERBB2/TGFB1	5
BP	GO:0008366	axon ensheathment	5/50	134/18670	2.88909e-05	0.000117008	3.06339e-05	MTOR/PTEN/AKT1/ERBB2/TGFB1	5
BP	GO:0016053	organic acid biosynthetic process	8/50	463/18670	2.89718e-05	0.000117193	3.06824e-05	TP53/STAT3/PTGS2/EGF/IL1B/HIF1A/TGFB1/IFNG	8
BP	GO:0001889	liver development	5/50	135/18670	2.99419e-05	0.00012097	3.16711e-05	JUN/EGFR/CCND1/IL10/TGFB1	5
BP	GO:0051346	negative regulation of hydrolase activity	8/50	466/18670	3.03356e-05	0.000122411	3.20486e-05	VEGFA/TP53/TNF/PTGS2/MMP9/SRC/AKT1/SERPINE1	8
BP	GO:0048662	negative regulation of smooth muscle cell proliferation	4/50	67/18670	3.08062e-05	0.000123922	3.2444e-05	PTEN/IL10/CDKN1A/IFNG	4
BP	GO:0050995	negative regulation of lipid catabolic process	3/50	23/18670	3.08218e-05	0.000123922	3.2444e-05	TNF/AKT1/IL1B	3
BP	GO:1901889	negative regulation of cell junction assembly	3/50	23/18670	3.08218e-05	0.000123922	3.2444e-05	TNF/SRC/PTEN	3
BP	GO:0072655	establishment of protein localization to mitochondrion	5/50	137/18670	3.21329e-05	0.000129037	3.37832e-05	TP53/MAPK8/AKT1/CASP8/HSP90AA1	5
BP	GO:0008584	male gonad development	5/50	138/18670	3.3274e-05	0.000133136	3.48565e-05	BCL2L1/CCND1/ESR1/ICAM1/AR	5
BP	GO:0046631	alpha-beta T cell activation	5/50	138/18670	3.3274e-05	0.000133136	3.48565e-05	IL6/STAT3/MTOR/IL2/IFNG	5
BP	GO:0061008	hepaticobiliary system development	5/50	138/18670	3.3274e-05	0.000133136	3.48565e-05	JUN/EGFR/CCND1/IL10/TGFB1	5
BP	GO:0016569	covalent chromatin modification	8/50	474/18670	3.42384e-05	0.00013683	3.58236e-05	VEGFA/MAPK3/TP53/MAPK8/JAK2/IL1B/EP300/TGFB1	8
BP	GO:0046546	development of primary male sexual characteristics	5/50	139/18670	3.44464e-05	0.000137496	3.59978e-05	BCL2L1/CCND1/ESR1/ICAM1/AR	5
BP	GO:0042698	ovulation cycle	4/50	69/18670	3.46094e-05	0.00013798	3.61248e-05	CASP3/EGFR/SRC/ESR1	4
BP	GO:0042445	hormone metabolic process	6/50	232/18670	3.47256e-05	0.000138278	3.62027e-05	TNF/ESR1/IL1B/HIF1A/SPP1/IFNG	6
BP	GO:0001783	B cell apoptotic process	3/50	24/18670	3.51585e-05	0.0001395	3.65226e-05	PTEN/IL10/IL2	3
BP	GO:0009110	vitamin biosynthetic process	3/50	24/18670	3.51585e-05	0.0001395	3.65226e-05	TNF/IL1B/IFNG	3
BP	GO:0071677	positive regulation of mononuclear cell migration	3/50	24/18670	3.51585e-05	0.0001395	3.65226e-05	TNF/TGFB1/SERPINE1	3
BP	GO:0072073	kidney epithelium development	5/50	140/18670	3.56505e-05	0.000141283	3.69895e-05	VEGFA/MYC/CAT/STAT1/TGFB1	5
BP	GO:0007004	telomere maintenance via telomerase	4/50	70/18670	3.66347e-05	0.000144494	3.78301e-05	MAPK3/MAPK1/SRC/HSP90AA1	4
BP	GO:0050766	positive regulation of phagocytosis	4/50	70/18670	3.66347e-05	0.000144494	3.78301e-05	TNF/CCL2/IL1B/IFNG	4
BP	GO:0051966	regulation of synaptic transmission, glutamatergic	4/50	70/18670	3.66347e-05	0.000144494	3.78301e-05	TNF/PTGS2/EGFR/CCL2	4
BP	GO:0072091	regulation of stem cell proliferation	4/50	70/18670	3.66347e-05	0.000144494	3.78301e-05	VEGFA/TP53/HIF1A/TGFB1	4
BP	GO:0070585	protein localization to mitochondrion	5/50	141/18670	3.68871e-05	0.000145145	3.80004e-05	TP53/MAPK8/AKT1/CASP8/HSP90AA1	5
BP	GO:0097530	granulocyte migration	5/50	141/18670	3.68871e-05	0.000145145	3.80004e-05	MAPK3/CXCL8/MAPK14/CCL2/IL1B	5
BP	GO:0043122	regulation of I-kappaB kinase/NF-kappaB signaling	6/50	237/18670	3.91219e-05	0.000153756	4.0255e-05	TNF/AKT1/ESR1/CASP8/STAT1/IL1B	6
BP	GO:0002449	lymphocyte mediated immunity	7/50	352/18670	3.96844e-05	0.000155256	4.06477e-05	IL6/TNF/IL10/IL2/IL1B/ICAM1/TGFB1	7
BP	GO:0002053	positive regulation of mesenchymal cell proliferation	3/50	25/18670	3.98776e-05	0.000155256	4.06477e-05	VEGFA/MYC/STAT1	3
BP	GO:0002719	negative regulation of cytokine production involved in immune response	3/50	25/18670	3.98776e-05	0.000155256	4.06477e-05	TNF/IL10/TGFB1	3
BP	GO:0009299	mRNA transcription	3/50	25/18670	3.98776e-05	0.000155256	4.06477e-05	TP53/STAT3/HIF1A	3
BP	GO:0060330	regulation of response to interferon-gamma	3/50	25/18670	3.98776e-05	0.000155256	4.06477e-05	STAT1/JAK2/IFNG	3
BP	GO:0060334	regulation of interferon-gamma-mediated signaling pathway	3/50	25/18670	3.98776e-05	0.000155256	4.06477e-05	STAT1/JAK2/IFNG	3
BP	GO:0060571	morphogenesis of an epithelial fold	3/50	25/18670	3.98776e-05	0.000155256	4.06477e-05	EGFR/HIF1A/AR	3
BP	GO:2000679	positive regulation of transcription regulatory region DNA binding	3/50	25/18670	3.98776e-05	0.000155256	4.06477e-05	EP300/TGFB1/IFNG	3
BP	GO:0000077	DNA damage checkpoint	5/50	145/18670	4.21696e-05	0.000163796	4.28835e-05	TP53/CCND1/MAPK14/CDKN1A/EP300	5
BP	GO:0071901	negative regulation of protein serine/threonine kinase activity	5/50	145/18670	4.21696e-05	0.000163796	4.28835e-05	CASP3/PTEN/AKT1/CDKN1A/IL1B	5
BP	GO:0043627	response to estrogen	4/50	73/18670	4.32324e-05	0.000167532	4.38616e-05	MAPK1/CCND1/ESR1/EP300	4
BP	GO:1903524	positive regulation of blood circulation	4/50	73/18670	4.32324e-05	0.000167532	4.38616e-05	PTGS2/EGFR/AKT1/ICAM1	4
BP	GO:0051250	negative regulation of lymphocyte activation	5/50	146/18670	4.35774e-05	0.000168672	4.41602e-05	CASP3/IL10/IL2/ERBB2/TGFB1	5
BP	GO:0034114	regulation of heterotypic cell-cell adhesion	3/50	26/18670	4.4994e-05	0.000172253	4.50978e-05	TNF/IL10/IL1B	3
BP	GO:0072539	T-helper 17 cell differentiation	3/50	26/18670	4.4994e-05	0.000172253	4.50978e-05	IL6/STAT3/IL2	3
BP	GO:1900739	regulation of protein insertion into mitochondrial membrane involved in apoptotic signaling pathway	3/50	26/18670	4.4994e-05	0.000172253	4.50978e-05	TP53/MAPK8/CASP8	3
BP	GO:1900740	positive regulation of protein insertion into mitochondrial membrane involved in apoptotic signaling pathway	3/50	26/18670	4.4994e-05	0.000172253	4.50978e-05	TP53/MAPK8/CASP8	3
BP	GO:1905048	regulation of metallopeptidase activity	3/50	26/18670	4.4994e-05	0.000172253	4.50978e-05	MAPK3/STAT3/MAPK14	3
BP	GO:0019359	nicotinamide nucleotide biosynthetic process	5/50	147/18670	4.50214e-05	0.000172253	4.50978e-05	TP53/STAT3/PTGS2/HIF1A/IFNG	5
BP	GO:0019363	pyridine nucleotide biosynthetic process	5/50	147/18670	4.50214e-05	0.000172253	4.50978e-05	TP53/STAT3/PTGS2/HIF1A/IFNG	5
BP	GO:0043524	negative regulation of neuron apoptotic process	5/50	147/18670	4.50214e-05	0.000172253	4.50978e-05	JUN/BCL2L1/CCL2/JAK2/HIF1A	5
BP	GO:0061351	neural precursor cell proliferation	5/50	147/18670	4.50214e-05	0.000172253	4.50978e-05	VEGFA/TP53/EGF/HIF1A/TGFB1	5
BP	GO:0071236	cellular response to antibiotic	5/50	147/18670	4.50214e-05	0.000172253	4.50978e-05	IL6/TP53/SRC/PTEN/IL10	5
BP	GO:0032677	regulation of interleukin-8 production	4/50	74/18670	4.56129e-05	0.000174316	4.56378e-05	TNF/IL10/IL1B/SERPINE1	4
BP	GO:2001056	positive regulation of cysteine-type endopeptidase activity	5/50	149/18670	4.80203e-05	0.000183305	4.79913e-05	TNF/MYC/CASP9/CASP8/JAK2	5
BP	GO:0010975	regulation of neuron projection development	8/50	499/18670	4.92532e-05	0.000187796	4.91669e-05	VEGFA/MTOR/PTEN/MAP2K1/AKT1/IL2/EP300/SPP1	8
BP	GO:0072525	pyridine-containing compound biosynthetic process	5/50	150/18670	4.95766e-05	0.000188812	4.9433e-05	TP53/STAT3/PTGS2/HIF1A/IFNG	5
BP	GO:0032102	negative regulation of response to external stimulus	7/50	365/18670	4.99299e-05	0.000189939	4.97282e-05	PTEN/IL10/IL2/CCL2/CDKN1A/SERPINE1/SPP1	7
BP	GO:1901991	negative regulation of mitotic cell cycle phase transition	6/50	248/18670	5.03744e-05	0.000191411	5.01135e-05	TP53/CCND1/PTEN/CCL2/CDKN1A/EP300	6
BP	GO:0042310	vasoconstriction	4/50	76/18670	5.06597e-05	0.000192056	5.02823e-05	PTGS2/EGFR/AKT1/ICAM1	4
BP	GO:0072088	nephron epithelium morphogenesis	4/50	76/18670	5.06597e-05	0.000192056	5.02823e-05	VEGFA/MYC/STAT1/TGFB1	4
BP	GO:0045926	negative regulation of growth	6/50	249/18670	5.15139e-05	0.000195071	5.10718e-05	TP53/PTEN/CDKN1A/HIF1A/TGFB1/SPP1	6
BP	GO:0010951	negative regulation of endopeptidase activity	6/50	250/18670	5.26739e-05	0.000199237	5.21624e-05	VEGFA/PTGS2/MMP9/SRC/AKT1/SERPINE1	6
BP	GO:0032675	regulation of interleukin-6 production	5/50	152/18670	5.2806e-05	0.00019951	5.22338e-05	IL6/STAT3/TNF/IL10/IL1B	5
BP	GO:0006278	RNA-dependent DNA biosynthetic process	4/50	77/18670	5.33306e-05	0.000200578	5.25136e-05	MAPK3/MAPK1/SRC/HSP90AA1	4
BP	GO:0016575	histone deacetylation	4/50	77/18670	5.33306e-05	0.000200578	5.25136e-05	VEGFA/TP53/MAPK8/TGFB1	4
BP	GO:0061418	regulation of transcription from RNA polymerase II promoter in response to hypoxia	4/50	77/18670	5.33306e-05	0.000200578	5.25136e-05	VEGFA/TP53/EP300/HIF1A	4
BP	GO:1901224	positive regulation of NIK/NF-kappaB signaling	4/50	77/18670	5.33306e-05	0.000200578	5.25136e-05	TNF/EGFR/IL1B/EP300	4
BP	GO:0032535	regulation of cellular component size	7/50	370/18670	5.44079e-05	0.000204399	5.35138e-05	VEGFA/MTOR/PTEN/AKT1/CREB1/ICAM1/SPP1	7
BP	GO:0000271	polysaccharide biosynthetic process	4/50	78/18670	5.61028e-05	0.000208872	5.46848e-05	EGF/MTOR/AKT1/TGFB1	4
BP	GO:0008306	associative learning	4/50	78/18670	5.61028e-05	0.000208872	5.46848e-05	MTOR/FOS/CREB1/HIF1A	4
BP	GO:0010827	regulation of glucose transmembrane transport	4/50	78/18670	5.61028e-05	0.000208872	5.46848e-05	TNF/AKT1/MAPK14/IL1B	4
BP	GO:0033143	regulation of intracellular steroid hormone receptor signaling pathway	4/50	78/18670	5.61028e-05	0.000208872	5.46848e-05	SRC/ESR1/EP300/AR	4
BP	GO:0055021	regulation of cardiac muscle tissue growth	4/50	78/18670	5.61028e-05	0.000208872	5.46848e-05	MAPK1/MTOR/PTEN/MAPK14	4
BP	GO:0072028	nephron morphogenesis	4/50	78/18670	5.61028e-05	0.000208872	5.46848e-05	VEGFA/MYC/STAT1/TGFB1	4
BP	GO:0090398	cellular senescence	4/50	78/18670	5.61028e-05	0.000208872	5.46848e-05	TP53/MAP2K1/MAPK14/CDKN1A	4
BP	GO:0033598	mammary gland epithelial cell proliferation	3/50	28/18670	5.6479e-05	0.000208872	5.46848e-05	MAPK1/CCND1/ESR1	3
BP	GO:0045408	regulation of interleukin-6 biosynthetic process	3/50	28/18670	5.6479e-05	0.000208872	5.46848e-05	STAT3/TNF/IL1B	3
BP	GO:0048679	regulation of axon regeneration	3/50	28/18670	5.6479e-05	0.000208872	5.46848e-05	PTEN/MAP2K1/SPP1	3
BP	GO:0051123	RNA polymerase II preinitiation complex assembly	3/50	28/18670	5.6479e-05	0.000208872	5.46848e-05	TP53/ESR1/CREB1	3
BP	GO:0060260	regulation of transcription initiation from RNA polymerase II promoter	3/50	28/18670	5.6479e-05	0.000208872	5.46848e-05	TP53/ESR1/CREB1	3
BP	GO:1902003	regulation of amyloid-beta formation	3/50	28/18670	5.6479e-05	0.000208872	5.46848e-05	TNF/CASP3/IFNG	3
BP	GO:1902932	positive regulation of alcohol biosynthetic process	3/50	28/18670	5.6479e-05	0.000208872	5.46848e-05	TNF/IL1B/IFNG	3
BP	GO:0006110	regulation of glycolytic process	4/50	79/18670	5.89788e-05	0.000217874	5.70417e-05	TP53/STAT3/HIF1A/IFNG	4
BP	GO:0043535	regulation of blood vessel endothelial cell migration	5/50	156/18670	5.97516e-05	0.000220483	5.77249e-05	VEGFA/PTGS2/AKT1/HIF1A/TGFB1	5
BP	GO:0006839	mitochondrial transport	6/50	256/18670	6.00816e-05	0.000221455	5.79794e-05	TP53/STAT3/MAPK8/BCL2L1/CASP8/HSP90AA1	6
BP	GO:0048863	stem cell differentiation	6/50	257/18670	6.13935e-05	0.00022604	5.91796e-05	MAPK3/TP53/STAT3/MAPK1/ESR1/HIF1A	6
BP	GO:0031570	DNA integrity checkpoint	5/50	157/18670	6.15934e-05	0.000226524	5.93066e-05	TP53/CCND1/MAPK14/CDKN1A/EP300	5
BP	GO:0010800	positive regulation of peptidyl-threonine phosphorylation	3/50	29/18670	6.28771e-05	0.00023048	6.03421e-05	MAPK1/EGF/TGFB1	3
BP	GO:0042226	interleukin-6 biosynthetic process	3/50	29/18670	6.28771e-05	0.00023048	6.03421e-05	STAT3/TNF/IL1B	3
BP	GO:0072538	T-helper 17 type immune response	3/50	29/18670	6.28771e-05	0.00023048	6.03421e-05	IL6/STAT3/IL2	3
BP	GO:0003007	heart morphogenesis	6/50	259/18670	6.4086e-05	0.000234652	6.14345e-05	VEGFA/TP53/JUN/MTOR/HIF1A/TGFB1	6
BP	GO:0030811	regulation of nucleotide catabolic process	4/50	81/18670	6.50515e-05	0.000237402	6.21545e-05	TP53/STAT3/HIF1A/IFNG	4
BP	GO:0032204	regulation of telomere maintenance	4/50	81/18670	6.50515e-05	0.000237402	6.21545e-05	MAPK3/MAPK1/MYC/SRC	4
BP	GO:0110110	positive regulation of animal organ morphogenesis	4/50	81/18670	6.50515e-05	0.000237402	6.21545e-05	VEGFA/MYC/TGFB1/AR	4
BP	GO:0006754	ATP biosynthetic process	5/50	160/18670	6.73829e-05	0.000245371	6.42409e-05	TP53/STAT3/HIF1A/TGFB1/IFNG	5
BP	GO:0046661	male sex differentiation	5/50	160/18670	6.73829e-05	0.000245371	6.42409e-05	BCL2L1/CCND1/ESR1/ICAM1/AR	5
BP	GO:0010833	telomere maintenance via telomere lengthening	4/50	82/18670	6.82531e-05	0.000247629	6.48319e-05	MAPK3/MAPK1/SRC/HSP90AA1	4
BP	GO:0032637	interleukin-8 production	4/50	82/18670	6.82531e-05	0.000247629	6.48319e-05	TNF/IL10/IL1B/SERPINE1	4
BP	GO:0071158	positive regulation of cell cycle arrest	4/50	82/18670	6.82531e-05	0.000247629	6.48319e-05	TP53/CDKN1A/EP300/TGFB1	4
BP	GO:0010466	negative regulation of peptidase activity	6/50	262/18670	6.83011e-05	0.000247629	6.48319e-05	VEGFA/PTGS2/MMP9/SRC/AKT1/SERPINE1	6
BP	GO:0032635	interleukin-6 production	5/50	161/18670	6.94032e-05	0.00025135	6.58062e-05	IL6/STAT3/TNF/IL10/IL1B	5
BP	GO:0001844	protein insertion into mitochondrial membrane involved in apoptotic signaling pathway	3/50	30/18670	6.97318e-05	0.000251443	6.58305e-05	TP53/MAPK8/CASP8	3
BP	GO:0035066	positive regulation of histone acetylation	3/50	30/18670	6.97318e-05	0.000251443	6.58305e-05	MAPK3/IL1B/TGFB1	3
BP	GO:0045940	positive regulation of steroid metabolic process	3/50	30/18670	6.97318e-05	0.000251443	6.58305e-05	TNF/IL1B/IFNG	3
BP	GO:0071480	cellular response to gamma radiation	3/50	30/18670	6.97318e-05	0.000251443	6.58305e-05	TP53/BCL2L1/CDKN1A	3
BP	GO:0009165	nucleotide biosynthetic process	7/50	386/18670	7.10078e-05	0.000255767	6.69625e-05	TP53/STAT3/PTGS2/MAPK1/HIF1A/TGFB1/IFNG	7
BP	GO:0031330	negative regulation of cellular catabolic process	6/50	264/18670	7.12323e-05	0.000256297	6.71014e-05	TP53/STAT3/MTOR/AKT1/IL10/MAPK14	6
BP	GO:0000723	telomere maintenance	5/50	162/18670	7.147e-05	0.000256874	6.72524e-05	MAPK3/MAPK1/MYC/SRC/HSP90AA1	5
BP	GO:0060420	regulation of heart growth	4/50	84/18670	7.49987e-05	0.000268975	7.04205e-05	MAPK1/MTOR/PTEN/MAPK14	4
BP	GO:0097756	negative regulation of blood vessel diameter	4/50	84/18670	7.49987e-05	0.000268975	7.04205e-05	PTGS2/EGFR/AKT1/ICAM1	4
BP	GO:1901293	nucleoside phosphate biosynthetic process	7/50	390/18670	7.57478e-05	0.000271323	7.10353e-05	TP53/STAT3/PTGS2/MAPK1/HIF1A/TGFB1/IFNG	7
BP	GO:1901988	negative regulation of cell cycle phase transition	6/50	267/18670	7.58168e-05	0.000271323	7.10353e-05	TP53/CCND1/PTEN/CCL2/CDKN1A/EP300	6
BP	GO:0033198	response to ATP	3/50	31/18670	7.70576e-05	0.00027517	7.20425e-05	PTGS2/PTEN/IL1B	3
BP	GO:0045742	positive regulation of epidermal growth factor receptor signaling pathway	3/50	31/18670	7.70576e-05	0.00027517	7.20425e-05	MMP9/EGF/AKT1	3
BP	GO:0007249	I-kappaB kinase/NF-kappaB signaling	6/50	269/18670	7.9002e-05	0.00028181	7.3781e-05	TNF/AKT1/ESR1/CASP8/STAT1/IL1B	6
BP	GO:0045165	cell fate commitment	6/50	270/18670	8.06341e-05	0.000287324	7.52245e-05	IL6/TP53/STAT3/CASP3/MTOR/AR	6
BP	GO:0006919	activation of cysteine-type endopeptidase activity involved in apoptotic process	4/50	86/18670	8.22174e-05	0.000292026	7.64554e-05	TNF/CASP9/CASP8/JAK2	4
BP	GO:0042058	regulation of epidermal growth factor receptor signaling pathway	4/50	86/18670	8.22174e-05	0.000292026	7.64554e-05	MMP9/EGFR/EGF/AKT1	4
BP	GO:0042446	hormone biosynthetic process	4/50	86/18670	8.22174e-05	0.000292026	7.64554e-05	TNF/IL1B/HIF1A/IFNG	4
BP	GO:0045589	regulation of regulatory T cell differentiation	3/50	32/18670	8.48689e-05	0.00029984	7.85013e-05	IL2/TGFB1/IFNG	3
BP	GO:0051968	positive regulation of synaptic transmission, glutamatergic	3/50	32/18670	8.48689e-05	0.00029984	7.85013e-05	PTGS2/EGFR/CCL2	3
BP	GO:0060325	face morphogenesis	3/50	32/18670	8.48689e-05	0.00029984	7.85013e-05	MMP2/EP300/TGFB1	3
BP	GO:0060674	placenta blood vessel development	3/50	32/18670	8.48689e-05	0.00029984	7.85013e-05	MAPK1/MAP2K1/AKT1	3
BP	GO:0070570	regulation of neuron projection regeneration	3/50	32/18670	8.48689e-05	0.00029984	7.85013e-05	PTEN/MAP2K1/SPP1	3
BP	GO:0043542	endothelial cell migration	6/50	273/18670	8.56928e-05	0.000302429	7.91792e-05	VEGFA/PTGS2/PTEN/AKT1/HIF1A/TGFB1	6
BP	GO:0051781	positive regulation of cell division	4/50	87/18670	8.60103e-05	0.000303227	7.93882e-05	VEGFA/CAT/IL1B/TGFB1	4
BP	GO:0038095	Fc-epsilon receptor signaling pathway	5/50	169/18670	8.72997e-05	0.000307447	8.04929e-05	MAPK3/JUN/MAPK1/MAPK8/FOS	5
BP	GO:0043470	regulation of carbohydrate catabolic process	4/50	88/18670	8.9929e-05	0.000315702	8.26542e-05	TP53/STAT3/HIF1A/IFNG	4
BP	GO:1900407	regulation of cellular response to oxidative stress	4/50	88/18670	8.9929e-05	0.000315702	8.26542e-05	TNF/AKT1/IL10/HIF1A	4
BP	GO:1901888	regulation of cell junction assembly	4/50	88/18670	8.9929e-05	0.000315702	8.26542e-05	VEGFA/TNF/SRC/PTEN	4
BP	GO:0009206	purine ribonucleoside triphosphate biosynthetic process	5/50	171/18670	9.22833e-05	0.000323625	8.47285e-05	TP53/STAT3/HIF1A/TGFB1/IFNG	5
BP	GO:0010464	regulation of mesenchymal cell proliferation	3/50	33/18670	9.31799e-05	0.000324032	8.4835e-05	VEGFA/MYC/STAT1	3
BP	GO:0016242	negative regulation of macroautophagy	3/50	33/18670	9.31799e-05	0.000324032	8.4835e-05	TP53/MTOR/AKT1	3
BP	GO:0036003	positive regulation of transcription from RNA polymerase II promoter in response to stress	3/50	33/18670	9.31799e-05	0.000324032	8.4835e-05	VEGFA/TP53/HIF1A	3
BP	GO:0045191	regulation of isotype switching	3/50	33/18670	9.31799e-05	0.000324032	8.4835e-05	IL10/IL2/TGFB1	3
BP	GO:0045736	negative regulation of cyclin-dependent protein serine/threonine kinase activity	3/50	33/18670	9.31799e-05	0.000324032	8.4835e-05	CASP3/PTEN/CDKN1A	3
BP	GO:0051204	protein insertion into mitochondrial membrane	3/50	33/18670	9.31799e-05	0.000324032	8.4835e-05	TP53/MAPK8/CASP8	3
BP	GO:1901186	positive regulation of ERBB signaling pathway	3/50	33/18670	9.31799e-05	0.000324032	8.4835e-05	MMP9/EGF/AKT1	3
BP	GO:2000758	positive regulation of peptidyl-lysine acetylation	3/50	33/18670	9.31799e-05	0.000324032	8.4835e-05	MAPK3/IL1B/TGFB1	3
BP	GO:0009145	purine nucleoside triphosphate biosynthetic process	5/50	172/18670	9.48558e-05	0.000329515	8.62705e-05	TP53/STAT3/HIF1A/TGFB1/IFNG	5
BP	GO:1903035	negative regulation of response to wounding	4/50	90/18670	9.81536e-05	0.000340615	8.91766e-05	PTEN/CDKN1A/SERPINE1/SPP1	4
BP	GO:0007435	salivary gland morphogenesis	3/50	34/18670	0.000102005	0.000350318	9.17172e-05	TNF/EGFR/TGFB1	3
BP	GO:0010922	positive regulation of phosphatase activity	3/50	34/18670	0.000102005	0.000350318	9.17172e-05	MTOR/JAK2/IFNG	3
BP	GO:0032148	activation of protein kinase B activity	3/50	34/18670	0.000102005	0.000350318	9.17172e-05	SRC/MTOR/AKT1	3
BP	GO:0034205	amyloid-beta formation	3/50	34/18670	0.000102005	0.000350318	9.17172e-05	TNF/CASP3/IFNG	3
BP	GO:0042533	tumor necrosis factor biosynthetic process	3/50	34/18670	0.000102005	0.000350318	9.17172e-05	IL10/JAK2/IFNG	3
BP	GO:0042534	regulation of tumor necrosis factor biosynthetic process	3/50	34/18670	0.000102005	0.000350318	9.17172e-05	IL10/JAK2/IFNG	3
BP	GO:0043276	anoikis	3/50	34/18670	0.000102005	0.000350318	9.17172e-05	SRC/MTOR/AKT1	3
BP	GO:0043368	positive T cell selection	3/50	34/18670	0.000102005	0.000350318	9.17172e-05	IL6/STAT3/MTOR	3
BP	GO:0045066	regulatory T cell differentiation	3/50	34/18670	0.000102005	0.000350318	9.17172e-05	IL2/TGFB1/IFNG	3
BP	GO:1904030	negative regulation of cyclin-dependent protein kinase activity	3/50	34/18670	0.000102005	0.000350318	9.17172e-05	CASP3/PTEN/CDKN1A	3
BP	GO:1901992	positive regulation of mitotic cell cycle phase transition	4/50	91/18670	0.000102465	0.000351535	9.20355e-05	EGFR/CCND1/AKT1/TGFB1	4
BP	GO:0002695	negative regulation of leukocyte activation	5/50	175/18670	0.000102905	0.000352319	9.22408e-05	CASP3/IL10/IL2/ERBB2/TGFB1	5
BP	GO:0032200	telomere organization	5/50	175/18670	0.000102905	0.000352319	9.22408e-05	MAPK3/MAPK1/MYC/SRC/HSP90AA1	5
BP	GO:0006986	response to unfolded protein	5/50	176/18670	0.000105702	0.000361149	9.45527e-05	CXCL8/CCND1/HSP90AA1/CCL2/EP300	5
BP	GO:0050796	regulation of insulin secretion	5/50	176/18670	0.000105702	0.000361149	9.45527e-05	TNF/JAK2/IL1B/HIF1A/IFNG	5
BP	GO:0021700	developmental maturation	6/50	284/18670	0.000106451	0.000363332	9.51243e-05	VEGFA/MTOR/PTEN/MMP2/CDKN1A/HIF1A	6
BP	GO:0009201	ribonucleoside triphosphate biosynthetic process	5/50	177/18670	0.000108557	0.000370141	9.69069e-05	TP53/STAT3/HIF1A/TGFB1/IFNG	5
BP	GO:0002701	negative regulation of production of molecular mediator of immune response	3/50	35/18670	0.000111358	0.00037707	9.8721e-05	TNF/IL10/TGFB1	3
BP	GO:0071312	cellular response to alkaloid	3/50	35/18670	0.000111358	0.00037707	9.8721e-05	CASP3/BCL2L1/ICAM1	3
BP	GO:1901030	positive regulation of mitochondrial outer membrane permeabilization involved in apoptotic signaling pathway	3/50	35/18670	0.000111358	0.00037707	9.8721e-05	TP53/MAPK8/CASP8	3
BP	GO:1902991	regulation of amyloid precursor protein catabolic process	3/50	35/18670	0.000111358	0.00037707	9.8721e-05	TNF/CASP3/IFNG	3
BP	GO:0007589	body fluid secretion	4/50	93/18670	0.000111497	0.00037707	9.8721e-05	VEGFA/CCND1/CREB1/HIF1A	4
BP	GO:0035249	synaptic transmission, glutamatergic	4/50	93/18670	0.000111497	0.00037707	9.8721e-05	TNF/PTGS2/EGFR/CCL2	4
BP	GO:0036473	cell death in response to oxidative stress	4/50	93/18670	0.000111497	0.00037707	9.8721e-05	AKT1/IL10/JAK2/HIF1A	4
BP	GO:0072080	nephron tubule development	4/50	93/18670	0.000111497	0.00037707	9.8721e-05	VEGFA/MYC/STAT1/TGFB1	4
BP	GO:0060993	kidney morphogenesis	4/50	94/18670	0.000116224	0.000392655	0.000102801	VEGFA/MYC/STAT1/TGFB1	4
BP	GO:0043534	blood vessel endothelial cell migration	5/50	180/18670	0.000117478	0.000396488	0.000103805	VEGFA/PTGS2/AKT1/HIF1A/TGFB1	5
BP	GO:0042100	B cell proliferation	4/50	95/18670	0.000121094	0.00040389	0.000105743	CASP3/IL10/IL2/CDKN1A	4
BP	GO:0051196	regulation of coenzyme metabolic process	4/50	95/18670	0.000121094	0.00040389	0.000105743	TP53/STAT3/HIF1A/IFNG	4
BP	GO:0061326	renal tubule development	4/50	95/18670	0.000121094	0.00040389	0.000105743	VEGFA/MYC/STAT1/TGFB1	4
BP	GO:0010742	macrophage derived foam cell differentiation	3/50	36/18670	0.000121252	0.00040389	0.000105743	STAT1/EP300/TGFB1	3
BP	GO:0030224	monocyte differentiation	3/50	36/18670	0.000121252	0.00040389	0.000105743	VEGFA/JUN/MYC	3
BP	GO:0030947	regulation of vascular endothelial growth factor receptor signaling pathway	3/50	36/18670	0.000121252	0.00040389	0.000105743	VEGFA/IL1B/HIF1A	3
BP	GO:0071392	cellular response to estradiol stimulus	3/50	36/18670	0.000121252	0.00040389	0.000105743	EGFR/IL10/ESR1	3
BP	GO:0071634	regulation of transforming growth factor beta production	3/50	36/18670	0.000121252	0.00040389	0.000105743	PTGS2/CREB1/HIF1A	3
BP	GO:0090077	foam cell differentiation	3/50	36/18670	0.000121252	0.00040389	0.000105743	STAT1/EP300/TGFB1	3
BP	GO:0090322	regulation of superoxide metabolic process	3/50	36/18670	0.000121252	0.00040389	0.000105743	TNF/EGFR/TGFB1	3
BP	GO:0097242	amyloid-beta clearance	3/50	36/18670	0.000121252	0.00040389	0.000105743	TNF/IGF1R/IFNG	3
BP	GO:1903131	mononuclear cell differentiation	3/50	36/18670	0.000121252	0.00040389	0.000105743	VEGFA/JUN/MYC	3
BP	GO:2001171	positive regulation of ATP biosynthetic process	3/50	36/18670	0.000121252	0.00040389	0.000105743	STAT3/HIF1A/IFNG	3
BP	GO:0090287	regulation of cellular response to growth factor stimulus	6/50	292/18670	0.00012392	0.000412363	0.000107961	VEGFA/TP53/IL1B/EP300/HIF1A/TGFB1	6
BP	GO:0010660	regulation of muscle cell apoptotic process	4/50	96/18670	0.000126111	0.000417562	0.000109322	TP53/PTEN/JAK2/IFNG	4
BP	GO:0019217	regulation of fatty acid metabolic process	4/50	96/18670	0.000126111	0.000417562	0.000109322	PTGS2/MTOR/AKT1/IL1B	4
BP	GO:0032755	positive regulation of interleukin-6 production	4/50	96/18670	0.000126111	0.000417562	0.000109322	IL6/STAT3/TNF/IL1B	4
BP	GO:0097327	response to antineoplastic agent	4/50	96/18670	0.000126111	0.000417562	0.000109322	EGFR/CASP9/ICAM1/TGFB1	4
BP	GO:2001169	regulation of ATP biosynthetic process	4/50	96/18670	0.000126111	0.000417562	0.000109322	TP53/STAT3/HIF1A/IFNG	4
BP	GO:0051146	striated muscle cell differentiation	6/50	293/18670	0.000126255	0.000417622	0.000109338	VEGFA/CASP3/MTOR/AKT1/MAPK14/TGFB1	6
BP	GO:0009127	purine nucleoside monophosphate biosynthetic process	5/50	183/18670	0.000126951	0.000418675	0.000109614	TP53/STAT3/HIF1A/TGFB1/IFNG	5
BP	GO:0009168	purine ribonucleoside monophosphate biosynthetic process	5/50	183/18670	0.000126951	0.000418675	0.000109614	TP53/STAT3/HIF1A/TGFB1/IFNG	5
BP	GO:0038061	NIK/NF-kappaB signaling	5/50	183/18670	0.000126951	0.000418675	0.000109614	TNF/EGFR/AKT1/IL1B/EP300	5
BP	GO:0043401	steroid hormone mediated signaling pathway	5/50	184/18670	0.000130236	0.000428656	0.000112227	SRC/ESR1/JAK2/EP300/AR	5
BP	GO:0043409	negative regulation of MAPK cascade	5/50	184/18670	0.000130236	0.000428656	0.000112227	MYC/PTEN/AKT1/IL1B/IGF1R	5
BP	GO:0001657	ureteric bud development	4/50	97/18670	0.000131277	0.000428808	0.000112267	VEGFA/MYC/CAT/TGFB1	4
BP	GO:0044773	mitotic DNA damage checkpoint	4/50	97/18670	0.000131277	0.000428808	0.000112267	TP53/CCND1/CDKN1A/EP300	4
BP	GO:0048709	oligodendrocyte differentiation	4/50	97/18670	0.000131277	0.000428808	0.000112267	MTOR/PTEN/ERBB2/TGFB1	4
BP	GO:1902882	regulation of response to oxidative stress	4/50	97/18670	0.000131277	0.000428808	0.000112267	TNF/AKT1/IL10/HIF1A	4
BP	GO:0002714	positive regulation of B cell mediated immunity	3/50	37/18670	0.000131703	0.000428808	0.000112267	TNF/IL2/TGFB1	3
BP	GO:0002891	positive regulation of immunoglobulin mediated immune response	3/50	37/18670	0.000131703	0.000428808	0.000112267	TNF/IL2/TGFB1	3
BP	GO:0007431	salivary gland development	3/50	37/18670	0.000131703	0.000428808	0.000112267	TNF/EGFR/TGFB1	3
BP	GO:0033280	response to vitamin D	3/50	37/18670	0.000131703	0.000428808	0.000112267	PTGS2/TGFB1/SPP1	3
BP	GO:0043114	regulation of vascular permeability	3/50	37/18670	0.000131703	0.000428808	0.000112267	VEGFA/SRC/TGFB1	3
BP	GO:0060323	head morphogenesis	3/50	37/18670	0.000131703	0.000428808	0.000112267	MMP2/EP300/TGFB1	3
BP	GO:2000273	positive regulation of signaling receptor activity	3/50	37/18670	0.000131703	0.000428808	0.000112267	EGF/CCL2/IFNG	3
BP	GO:0046328	regulation of JNK cascade	5/50	185/18670	0.000133585	0.000434512	0.00011376	TNF/EGFR/AKT1/IL1B/IGF1R	5
BP	GO:1903522	regulation of blood circulation	6/50	297/18670	0.000135947	0.000441761	0.000115658	PTGS2/EGFR/AKT1/IL2/JAK2/ICAM1	6
BP	GO:0072163	mesonephric epithelium development	4/50	98/18670	0.000136594	0.000442998	0.000115982	VEGFA/MYC/CAT/TGFB1	4
BP	GO:0072164	mesonephric tubule development	4/50	98/18670	0.000136594	0.000442998	0.000115982	VEGFA/MYC/CAT/TGFB1	4
BP	GO:0016572	histone phosphorylation	3/50	38/18670	0.000142722	0.000459728	0.000120362	MAPK3/JAK2/IL1B	3
BP	GO:0048009	insulin-like growth factor receptor signaling pathway	3/50	38/18670	0.000142722	0.000459728	0.000120362	AKT1/IGF1R/AR	3
BP	GO:0048246	macrophage chemotaxis	3/50	38/18670	0.000142722	0.000459728	0.000120362	MAPK3/MAPK14/CCL2	3
BP	GO:0060416	response to growth hormone	3/50	38/18670	0.000142722	0.000459728	0.000120362	STAT3/AKT1/JAK2	3
BP	GO:0071604	transforming growth factor beta production	3/50	38/18670	0.000142722	0.000459728	0.000120362	PTGS2/CREB1/HIF1A	3
BP	GO:1904037	positive regulation of epithelial cell apoptotic process	3/50	38/18670	0.000142722	0.000459728	0.000120362	IL6/CCL2/JAK2	3
BP	GO:1904706	negative regulation of vascular smooth muscle cell proliferation	3/50	38/18670	0.000142722	0.000459728	0.000120362	PTEN/IL10/CDKN1A	3
BP	GO:0009142	nucleoside triphosphate biosynthetic process	5/50	188/18670	0.000144031	0.000463496	0.000121348	TP53/STAT3/HIF1A/TGFB1/IFNG	5
BP	GO:0019362	pyridine nucleotide metabolic process	5/50	189/18670	0.000147649	0.000473908	0.000124074	TP53/STAT3/PTGS2/HIF1A/IFNG	5
BP	GO:0046496	nicotinamide nucleotide metabolic process	5/50	189/18670	0.000147649	0.000473908	0.000124074	TP53/STAT3/PTGS2/HIF1A/IFNG	5
BP	GO:0010657	muscle cell apoptotic process	4/50	100/18670	0.000147695	0.000473908	0.000124074	TP53/PTEN/JAK2/IFNG	4
BP	GO:0032611	interleukin-1 beta production	4/50	101/18670	0.000153483	0.000491532	0.000128688	CASP8/JAK2/IL1B/IFNG	4
BP	GO:0032649	regulation of interferon-gamma production	4/50	101/18670	0.000153483	0.000491532	0.000128688	TNF/IL10/IL2/IL1B	4
BP	GO:0010661	positive regulation of muscle cell apoptotic process	3/50	39/18670	0.000154324	0.000492326	0.000128896	TP53/PTEN/IFNG	3
BP	GO:0019048	modulation by virus of host morphology or physiology	3/50	39/18670	0.000154324	0.000492326	0.000128896	BCL2L1/CASP8/TGFB1	3
BP	GO:0033146	regulation of intracellular estrogen receptor signaling pathway	3/50	39/18670	0.000154324	0.000492326	0.000128896	SRC/ESR1/AR	3
BP	GO:0060969	negative regulation of gene silencing	3/50	39/18670	0.000154324	0.000492326	0.000128896	TP53/ESR1/TGFB1	3
BP	GO:0010256	endomembrane system organization	7/50	438/18670	0.000155793	0.000496535	0.000129998	MAPK3/MAPK1/PTEN/MAP2K1/AKT1/CREB1/AR	7
BP	GO:0001823	mesonephros development	4/50	102/18670	0.000159434	0.000507652	0.000132909	VEGFA/MYC/CAT/TGFB1	4
BP	GO:0002377	immunoglobulin production	5/50	193/18670	0.00016282	0.000517936	0.000135601	IL6/TNF/IL10/IL2/TGFB1	5
BP	GO:0032091	negative regulation of protein binding	4/50	103/18670	0.00016555	0.000525614	0.000137612	MAPK3/MAPK8/AKT1/IL10	4
BP	GO:0032652	regulation of interleukin-1 production	4/50	103/18670	0.00016555	0.000525614	0.000137612	IL10/CASP8/JAK2/IFNG	4
BP	GO:0090184	positive regulation of kidney development	3/50	40/18670	0.000166523	0.000527694	0.000138156	VEGFA/MYC/TGFB1	3
BP	GO:2000008	regulation of protein localization to cell surface	3/50	40/18670	0.000166523	0.000527694	0.000138156	TNF/EGF/AKT1	3
BP	GO:0072524	pyridine-containing compound metabolic process	5/50	195/18670	0.000170839	0.000540854	0.000141601	TP53/STAT3/PTGS2/HIF1A/IFNG	5
BP	GO:0055017	cardiac muscle tissue growth	4/50	105/18670	0.000178289	0.000563902	0.000147636	MAPK1/MTOR/PTEN/MAPK14	4
BP	GO:0009156	ribonucleoside monophosphate biosynthetic process	5/50	197/18670	0.000179156	0.000565584	0.000148076	TP53/STAT3/HIF1A/TGFB1/IFNG	5
BP	GO:0050873	brown fat cell differentiation	3/50	41/18670	0.000179332	0.000565584	0.000148076	PTGS2/MTOR/MAPK14	3
BP	GO:1900117	regulation of execution phase of apoptosis	3/50	41/18670	0.000179332	0.000565584	0.000148076	IL6/TP53/BCL2L1	3
BP	GO:0044774	mitotic DNA integrity checkpoint	4/50	106/18670	0.000184917	0.000582093	0.000152398	TP53/CCND1/CDKN1A/EP300	4
BP	GO:1901989	positive regulation of cell cycle phase transition	4/50	106/18670	0.000184917	0.000582093	0.000152398	EGFR/CCND1/AKT1/TGFB1	4
BP	GO:0035966	response to topologically incorrect protein	5/50	199/18670	0.00018778	0.000589988	0.000154465	CXCL8/CCND1/HSP90AA1/CCL2/EP300	5
BP	GO:0050866	negative regulation of cell activation	5/50	199/18670	0.00018778	0.000589988	0.000154465	CASP3/IL10/IL2/ERBB2/TGFB1	5
BP	GO:0045088	regulation of innate immune response	7/50	452/18670	0.000189023	0.000593333	0.000155341	SRC/ESR1/CASP8/STAT1/JAK2/EP300/IFNG	7
BP	GO:0002639	positive regulation of immunoglobulin production	3/50	42/18670	0.000192763	0.000603929	0.000158115	IL6/IL2/TGFB1	3
BP	GO:0031641	regulation of myelination	3/50	42/18670	0.000192763	0.000603929	0.000158115	MTOR/PTEN/AKT1	3
BP	GO:1904659	glucose transmembrane transport	4/50	108/18670	0.000198704	0.000621956	0.000162835	TNF/AKT1/MAPK14/IL1B	4
BP	GO:0072009	nephron epithelium development	4/50	109/18670	0.000205868	0.000642546	0.000168226	VEGFA/MYC/STAT1/TGFB1	4
BP	GO:0001953	negative regulation of cell-matrix adhesion	3/50	43/18670	0.00020683	0.000642546	0.000168226	SRC/PTEN/SERPINE1	3
BP	GO:0006775	fat-soluble vitamin metabolic process	3/50	43/18670	0.00020683	0.000642546	0.000168226	TNF/IL1B/IFNG	3
BP	GO:0008631	intrinsic apoptotic signaling pathway in response to oxidative stress	3/50	43/18670	0.00020683	0.000642546	0.000168226	AKT1/JAK2/HIF1A	3
BP	GO:0031279	regulation of cyclase activity	3/50	43/18670	0.00020683	0.000642546	0.000168226	MAPK3/MAPK8/MAPK14	3
BP	GO:0045746	negative regulation of Notch signaling pathway	3/50	43/18670	0.00020683	0.000642546	0.000168226	EGFR/EGF/AKT1	3
BP	GO:0071364	cellular response to epidermal growth factor stimulus	3/50	43/18670	0.00020683	0.000642546	0.000168226	EGFR/AKT1/ERBB2	3
BP	GO:1901985	positive regulation of protein acetylation	3/50	43/18670	0.00020683	0.000642546	0.000168226	MAPK3/IL1B/TGFB1	3
BP	GO:0010463	mesenchymal cell proliferation	3/50	44/18670	0.000221546	0.000682518	0.000178691	VEGFA/MYC/STAT1	3
BP	GO:0034105	positive regulation of tissue remodeling	3/50	44/18670	0.000221546	0.000682518	0.000178691	EGFR/IL2/SPP1	3
BP	GO:0035307	positive regulation of protein dephosphorylation	3/50	44/18670	0.000221546	0.000682518	0.000178691	MTOR/JAK2/TGFB1	3
BP	GO:0042987	amyloid precursor protein catabolic process	3/50	44/18670	0.000221546	0.000682518	0.000178691	TNF/CASP3/IFNG	3
BP	GO:0045601	regulation of endothelial cell differentiation	3/50	44/18670	0.000221546	0.000682518	0.000178691	VEGFA/TNF/IL1B	3
BP	GO:0070266	necroptotic process	3/50	44/18670	0.000221546	0.000682518	0.000178691	TP53/TNF/CASP8	3
BP	GO:0070897	transcription preinitiation complex assembly	3/50	44/18670	0.000221546	0.000682518	0.000178691	TP53/ESR1/CREB1	3
BP	GO:0071622	regulation of granulocyte chemotaxis	3/50	44/18670	0.000221546	0.000682518	0.000178691	MAPK3/CXCL8/MAPK14	3
BP	GO:1901028	regulation of mitochondrial outer membrane permeabilization involved in apoptotic signaling pathway	3/50	44/18670	0.000221546	0.000682518	0.000178691	TP53/MAPK8/CASP8	3
BP	GO:0006733	oxidoreduction coenzyme metabolic process	5/50	207/18670	0.000225489	0.000693378	0.000181534	TP53/STAT3/PTGS2/HIF1A/IFNG	5
BP	GO:0030073	insulin secretion	5/50	207/18670	0.000225489	0.000693378	0.000181534	TNF/JAK2/IL1B/HIF1A/IFNG	5
BP	GO:0008645	hexose transmembrane transport	4/50	112/18670	0.000228481	0.000699986	0.000183264	TNF/AKT1/MAPK14/IL1B	4
BP	GO:0043279	response to alkaloid	4/50	112/18670	0.000228481	0.000699986	0.000183264	CASP3/BCL2L1/MTOR/ICAM1	4
BP	GO:0060419	heart growth	4/50	112/18670	0.000228481	0.000699986	0.000183264	MAPK1/MTOR/PTEN/MAPK14	4
BP	GO:1903510	mucopolysaccharide metabolic process	4/50	112/18670	0.000228481	0.000699986	0.000183264	EGF/AKT1/IL1B/TGFB1	4
BP	GO:0009124	nucleoside monophosphate biosynthetic process	5/50	208/18670	0.00023058	0.000705116	0.000184607	TP53/STAT3/HIF1A/TGFB1/IFNG	5
BP	GO:0050792	regulation of viral process	5/50	208/18670	0.00023058	0.000705116	0.000184607	JUN/TNF/CXCL8/STAT1/EP300	5
BP	GO:0032609	interferon-gamma production	4/50	113/18670	0.000236401	0.000721858	0.00018899	TNF/IL10/IL2/IL1B	4
BP	GO:0032570	response to progesterone	3/50	45/18670	0.000236924	0.000721858	0.00018899	SRC/FOS/TGFB1	3
BP	GO:0042771	intrinsic apoptotic signaling pathway in response to DNA damage by p53 class mediator	3/50	45/18670	0.000236924	0.000721858	0.00018899	TP53/CDKN1A/EP300	3
BP	GO:0048538	thymus development	3/50	45/18670	0.000236924	0.000721858	0.00018899	MAPK3/MAPK1/MAP2K1	3
BP	GO:0051235	maintenance of location	6/50	330/18670	0.000240511	0.000732114	0.000191675	IL6/TNF/AKT1/IL10/IL1B/TGFB1	6
BP	GO:0008202	steroid metabolic process	6/50	331/18670	0.000244456	0.000740911	0.000193978	TNF/CAT/ESR1/IL1B/SPP1/IFNG	6
BP	GO:0005976	polysaccharide metabolic process	4/50	114/18670	0.000244516	0.000740911	0.000193978	EGF/MTOR/AKT1/TGFB1	4
BP	GO:0015749	monosaccharide transmembrane transport	4/50	114/18670	0.000244516	0.000740911	0.000193978	TNF/AKT1/MAPK14/IL1B	4
BP	GO:0042752	regulation of circadian rhythm	4/50	114/18670	0.000244516	0.000740911	0.000193978	TP53/MAPK8/MTOR/CREB1	4
BP	GO:0045446	endothelial cell differentiation	4/50	114/18670	0.000244516	0.000740911	0.000193978	VEGFA/TNF/IL1B/ICAM1	4
BP	GO:0090150	establishment of protein localization to membrane	6/50	332/18670	0.000248452	0.00075215	0.000196921	TP53/MAPK8/EGFR/CASP8/HSP90AA1/ERBB2	6
BP	GO:0006096	glycolytic process	4/50	115/18670	0.00025283	0.000759617	0.000198876	TP53/STAT3/HIF1A/IFNG	4
BP	GO:0002437	inflammatory response to antigenic stimulus	3/50	46/18670	0.000252977	0.000759617	0.000198876	TNF/IL10/ICAM1	3
BP	GO:0006984	ER-nucleus signaling pathway	3/50	46/18670	0.000252977	0.000759617	0.000198876	TP53/CXCL8/CCL2	3
BP	GO:0022602	ovulation cycle process	3/50	46/18670	0.000252977	0.000759617	0.000198876	CASP3/SRC/ESR1	3
BP	GO:0030810	positive regulation of nucleotide biosynthetic process	3/50	46/18670	0.000252977	0.000759617	0.000198876	STAT3/HIF1A/IFNG	3
BP	GO:0044003	modification by symbiont of host morphology or physiology	3/50	46/18670	0.000252977	0.000759617	0.000198876	BCL2L1/CASP8/TGFB1	3
BP	GO:0048512	circadian behavior	3/50	46/18670	0.000252977	0.000759617	0.000198876	TP53/MTOR/PTEN	3
BP	GO:1900373	positive regulation of purine nucleotide biosynthetic process	3/50	46/18670	0.000252977	0.000759617	0.000198876	STAT3/HIF1A/IFNG	3
BP	GO:1904036	negative regulation of epithelial cell apoptotic process	3/50	46/18670	0.000252977	0.000759617	0.000198876	MTOR/ICAM1/SERPINE1	3
BP	GO:0030336	negative regulation of cell migration	6/50	334/18670	0.000256598	0.000769795	0.000201541	STAT3/PTEN/AKT1/CCL2/TGFB1/SERPINE1	6
BP	GO:0006757	ATP generation from ADP	4/50	116/18670	0.000261346	0.000782624	0.000204899	TP53/STAT3/HIF1A/IFNG	4
BP	GO:0034219	carbohydrate transmembrane transport	4/50	116/18670	0.000261346	0.000782624	0.000204899	TNF/AKT1/MAPK14/IL1B	4
BP	GO:0016051	carbohydrate biosynthetic process	5/50	214/18670	0.000262993	0.000786137	0.000205819	EGF/MTOR/AKT1/EP300/TGFB1	5
BP	GO:2001020	regulation of response to DNA damage stimulus	5/50	214/18670	0.000262993	0.000786137	0.000205819	TP53/MYC/EGFR/BCL2L1/CASP9	5
BP	GO:0007596	blood coagulation	6/50	336/18670	0.000264954	0.000791288	0.000207168	MAPK3/IL6/MAPK1/SRC/JAK2/SERPINE1	6
BP	GO:0016311	dephosphorylation	7/50	478/18670	0.000265913	0.000793438	0.000207731	TNF/SRC/MTOR/PTEN/JAK2/TGFB1/IFNG	7
BP	GO:0010810	regulation of cell-substrate adhesion	5/50	215/18670	0.000268715	0.000794411	0.000207985	VEGFA/SRC/PTEN/JAK2/SERPINE1	5
BP	GO:0002204	somatic recombination of immunoglobulin genes involved in immune response	3/50	47/18670	0.000269717	0.000794411	0.000207985	IL10/IL2/TGFB1	3
BP	GO:0002208	somatic diversification of immunoglobulins involved in immune response	3/50	47/18670	0.000269717	0.000794411	0.000207985	IL10/IL2/TGFB1	3
BP	GO:0007622	rhythmic behavior	3/50	47/18670	0.000269717	0.000794411	0.000207985	TP53/MTOR/PTEN	3
BP	GO:0010799	regulation of peptidyl-threonine phosphorylation	3/50	47/18670	0.000269717	0.000794411	0.000207985	MAPK1/EGF/TGFB1	3
BP	GO:0030574	collagen catabolic process	3/50	47/18670	0.000269717	0.000794411	0.000207985	MMP9/MMP2/MMP1	3
BP	GO:0031952	regulation of protein autophosphorylation	3/50	47/18670	0.000269717	0.000794411	0.000207985	VEGFA/JUN/SRC	3
BP	GO:0035722	interleukin-12-mediated signaling pathway	3/50	47/18670	0.000269717	0.000794411	0.000207985	IL10/JAK2/IFNG	3
BP	GO:0045058	T cell selection	3/50	47/18670	0.000269717	0.000794411	0.000207985	IL6/STAT3/MTOR	3
BP	GO:0045190	isotype switching	3/50	47/18670	0.000269717	0.000794411	0.000207985	IL10/IL2/TGFB1	3
BP	GO:0050435	amyloid-beta metabolic process	3/50	47/18670	0.000269717	0.000794411	0.000207985	TNF/CASP3/IFNG	3
BP	GO:0070231	T cell apoptotic process	3/50	47/18670	0.000269717	0.000794411	0.000207985	TP53/AKT1/HIF1A	3
BP	GO:1903580	positive regulation of ATP metabolic process	3/50	47/18670	0.000269717	0.000794411	0.000207985	STAT3/HIF1A/IFNG	3
BP	GO:0007613	memory	4/50	117/18670	0.000270066	0.000794411	0.000207985	PTGS2/MTOR/PTEN/CREB1	4
BP	GO:1900371	regulation of purine nucleotide biosynthetic process	4/50	117/18670	0.000270066	0.000794411	0.000207985	TP53/STAT3/HIF1A/IFNG	4
BP	GO:1901222	regulation of NIK/NF-kappaB signaling	4/50	117/18670	0.000270066	0.000794411	0.000207985	TNF/EGFR/IL1B/EP300	4
BP	GO:0030808	regulation of nucleotide biosynthetic process	4/50	118/18670	0.000278994	0.000819945	0.00021467	TP53/STAT3/HIF1A/IFNG	4
BP	GO:0034765	regulation of ion transmembrane transport	7/50	483/18670	0.000283248	0.000831713	0.000217751	MMP9/MTOR/PTEN/AKT1/CCL2/TGFB1/IFNG	7
BP	GO:0007599	hemostasis	6/50	341/18670	0.000286784	0.00083874	0.000219591	MAPK3/IL6/MAPK1/SRC/JAK2/SERPINE1	6
BP	GO:0022604	regulation of cell morphogenesis	7/50	484/18670	0.000286822	0.00083874	0.000219591	VEGFA/SRC/PTEN/MAP2K1/CCL2/ICAM1/SPP1	7
BP	GO:0008542	visual learning	3/50	48/18670	0.000287157	0.00083874	0.000219591	MTOR/CREB1/HIF1A	3
BP	GO:0030850	prostate gland development	3/50	48/18670	0.000287157	0.00083874	0.000219591	PTEN/ESR1/AR	3
BP	GO:0035272	exocrine system development	3/50	48/18670	0.000287157	0.00083874	0.000219591	TNF/EGFR/TGFB1	3
BP	GO:0055023	positive regulation of cardiac muscle tissue growth	3/50	48/18670	0.000287157	0.00083874	0.000219591	MAPK1/MTOR/MAPK14	3
BP	GO:0001952	regulation of cell-matrix adhesion	4/50	119/18670	0.000288131	0.000839371	0.000219757	VEGFA/SRC/PTEN/SERPINE1	4
BP	GO:0042866	pyruvate biosynthetic process	4/50	119/18670	0.000288131	0.000839371	0.000219757	TP53/STAT3/HIF1A/IFNG	4
BP	GO:0051193	regulation of cofactor metabolic process	4/50	119/18670	0.000288131	0.000839371	0.000219757	TP53/STAT3/HIF1A/IFNG	4
BP	GO:0050817	coagulation	6/50	342/18670	0.000291315	0.000847904	0.00022199	MAPK3/IL6/MAPK1/SRC/JAK2/SERPINE1	6
BP	GO:0072330	monocarboxylic acid biosynthetic process	6/50	343/18670	0.000295903	0.000860501	0.000225289	TP53/STAT3/PTGS2/IL1B/HIF1A/IFNG	6
BP	GO:0002698	negative regulation of immune effector process	4/50	120/18670	0.000297482	0.000863581	0.000226095	TNF/IL10/IL2/TGFB1	4
BP	GO:0072089	stem cell proliferation	4/50	120/18670	0.000297482	0.000863581	0.000226095	VEGFA/TP53/HIF1A/TGFB1	4
BP	GO:0032757	positive regulation of interleukin-8 production	3/50	49/18670	0.000305309	0.000882446	0.000231034	TNF/IL1B/SERPINE1	3
BP	GO:0043124	negative regulation of I-kappaB kinase/NF-kappaB signaling	3/50	49/18670	0.000305309	0.000882446	0.000231034	ESR1/CASP8/STAT1	3
BP	GO:0071349	cellular response to interleukin-12	3/50	49/18670	0.000305309	0.000882446	0.000231034	IL10/JAK2/IFNG	3
BP	GO:0097300	programmed necrotic cell death	3/50	49/18670	0.000305309	0.000882446	0.000231034	TP53/TNF/CASP8	3
BP	GO:1990090	cellular response to nerve growth factor stimulus	3/50	49/18670	0.000305309	0.000882446	0.000231034	PTEN/AKT1/CREB1	3
BP	GO:0030968	endoplasmic reticulum unfolded protein response	4/50	121/18670	0.000307048	0.000886702	0.000232148	CXCL8/CCND1/CCL2/EP300	4
BP	GO:0043903	regulation of symbiosis, encompassing mutualism through parasitism	5/50	222/18670	0.00031147	0.000895554	0.000234466	JUN/TNF/CXCL8/STAT1/EP300	5
BP	GO:0010749	regulation of nitric oxide mediated signal transduction	2/50	10/18670	0.000312001	0.000895554	0.000234466	VEGFA/EGFR	2
BP	GO:0045945	positive regulation of transcription by RNA polymerase III	2/50	10/18670	0.000312001	0.000895554	0.000234466	MTOR/AR	2
BP	GO:0071104	response to interleukin-9	2/50	10/18670	0.000312001	0.000895554	0.000234466	STAT3/STAT1	2
BP	GO:0072203	cell proliferation involved in metanephros development	2/50	10/18670	0.000312001	0.000895554	0.000234466	MYC/STAT1	2
BP	GO:0090336	positive regulation of brown fat cell differentiation	2/50	10/18670	0.000312001	0.000895554	0.000234466	PTGS2/MAPK14	2
BP	GO:1900222	negative regulation of amyloid-beta clearance	2/50	10/18670	0.000312001	0.000895554	0.000234466	TNF/IFNG	2
BP	GO:1903578	regulation of ATP metabolic process	4/50	122/18670	0.000316834	0.00090864	0.000237892	TP53/STAT3/HIF1A/IFNG	4
BP	GO:0009409	response to cold	3/50	50/18670	0.000324186	0.000926524	0.000242574	FOS/CASP8/HSP90AA1	3
BP	GO:0010171	body morphogenesis	3/50	50/18670	0.000324186	0.000926524	0.000242574	MMP2/EP300/TGFB1	3
BP	GO:0070671	response to interleukin-12	3/50	50/18670	0.000324186	0.000926524	0.000242574	IL10/JAK2/IFNG	3
BP	GO:1900087	positive regulation of G1/S transition of mitotic cell cycle	3/50	50/18670	0.000324186	0.000926524	0.000242574	EGFR/CCND1/AKT1	3
BP	GO:2000146	negative regulation of cell motility	6/50	349/18670	0.000324635	0.000927009	0.000242701	STAT3/PTEN/AKT1/CCL2/TGFB1/SERPINE1	6
BP	GO:0001649	osteoblast differentiation	5/50	225/18670	0.000331297	0.00094522	0.000247469	IL6/TNF/AKT1/CAT/SPP1	5
BP	GO:0045599	negative regulation of fat cell differentiation	3/50	51/18670	0.0003438	0.000979209	0.000256368	IL6/TNF/TGFB1	3
BP	GO:0048260	positive regulation of receptor-mediated endocytosis	3/50	51/18670	0.0003438	0.000979209	0.000256368	VEGFA/EGF/SERPINE1	3
BP	GO:0001894	tissue homeostasis	5/50	227/18670	0.000345037	0.000981891	0.00025707	VEGFA/IL6/EGFR/SRC/SPP1	5
BP	GO:0046031	ADP metabolic process	4/50	126/18670	0.000358224	0.00101854	0.000266666	TP53/STAT3/HIF1A/IFNG	4
BP	GO:0010594	regulation of endothelial cell migration	5/50	229/18670	0.000359204	0.00102046	0.000267167	VEGFA/PTGS2/AKT1/HIF1A/TGFB1	5
BP	GO:0006959	humoral immune response	6/50	356/18670	0.00036088	0.00102434	0.000268184	IL6/TNF/CXCL8/CCL2/IL1B/IFNG	6
BP	GO:0016447	somatic recombination of immunoglobulin gene segments	3/50	52/18670	0.000364162	0.00102839	0.000269243	IL10/IL2/TGFB1	3
BP	GO:0032731	positive regulation of interleukin-1 beta production	3/50	52/18670	0.000364162	0.00102839	0.000269243	CASP8/JAK2/IFNG	3
BP	GO:0060421	positive regulation of heart growth	3/50	52/18670	0.000364162	0.00102839	0.000269243	MAPK1/MTOR/MAPK14	3
BP	GO:1990089	response to nerve growth factor	3/50	52/18670	0.000364162	0.00102839	0.000269243	PTEN/AKT1/CREB1	3
BP	GO:2000179	positive regulation of neural precursor cell proliferation	3/50	52/18670	0.000364162	0.00102839	0.000269243	VEGFA/EGF/HIF1A	3
BP	GO:2000677	regulation of transcription regulatory region DNA binding	3/50	52/18670	0.000364162	0.00102839	0.000269243	EP300/TGFB1/IFNG	3
BP	GO:0032368	regulation of lipid transport	4/50	127/18670	0.000369148	0.00104158	0.000272697	EGF/AKT1/IL1B/SPP1	4
BP	GO:0002576	platelet degranulation	4/50	128/18670	0.000380308	0.00106418	0.000278614	VEGFA/EGF/TGFB1/SERPINE1	4
BP	GO:0033327	Leydig cell differentiation	2/50	11/18670	0.000380682	0.00106418	0.000278614	CCND1/AR	2
BP	GO:0036462	TRAIL-activated apoptotic signaling pathway	2/50	11/18670	0.000380682	0.00106418	0.000278614	PTEN/CASP8	2
BP	GO:0043117	positive regulation of vascular permeability	2/50	11/18670	0.000380682	0.00106418	0.000278614	VEGFA/TGFB1	2
BP	GO:0051024	positive regulation of immunoglobulin secretion	2/50	11/18670	0.000380682	0.00106418	0.000278614	IL6/IL2	2
BP	GO:0051974	negative regulation of telomerase activity	2/50	11/18670	0.000380682	0.00106418	0.000278614	TP53/SRC	2
BP	GO:0061307	cardiac neural crest cell differentiation involved in heart development	2/50	11/18670	0.000380682	0.00106418	0.000278614	MAPK3/MAPK1	2
BP	GO:0061308	cardiac neural crest cell development involved in heart development	2/50	11/18670	0.000380682	0.00106418	0.000278614	MAPK3/MAPK1	2
BP	GO:0071803	positive regulation of podosome assembly	2/50	11/18670	0.000380682	0.00106418	0.000278614	TNF/SRC	2
BP	GO:0072683	T cell extravasation	2/50	11/18670	0.000380682	0.00106418	0.000278614	CCL2/ICAM1	2
BP	GO:2001269	positive regulation of cysteine-type endopeptidase activity involved in apoptotic signaling pathway	2/50	11/18670	0.000380682	0.00106418	0.000278614	CASP8/JAK2	2
BP	GO:0007632	visual behavior	3/50	53/18670	0.000385286	0.00107074	0.000280332	MTOR/CREB1/HIF1A	3
BP	GO:0035065	regulation of histone acetylation	3/50	53/18670	0.000385286	0.00107074	0.000280332	MAPK3/IL1B/TGFB1	3
BP	GO:0038066	p38MAPK cascade	3/50	53/18670	0.000385286	0.00107074	0.000280332	VEGFA/MAPK14/IL1B	3
BP	GO:0045661	regulation of myoblast differentiation	3/50	53/18670	0.000385286	0.00107074	0.000280332	TNF/MAPK14/TGFB1	3
BP	GO:0045840	positive regulation of mitotic nuclear division	3/50	53/18670	0.000385286	0.00107074	0.000280332	EGF/IL1B/TGFB1	3
BP	GO:1901185	negative regulation of ERBB signaling pathway	3/50	53/18670	0.000385286	0.00107074	0.000280332	EGFR/EGF/ERBB2	3
BP	GO:1905517	macrophage migration	3/50	53/18670	0.000385286	0.00107074	0.000280332	MAPK3/MAPK14/CCL2	3
BP	GO:0010948	negative regulation of cell cycle process	6/50	361/18670	0.000388659	0.00107921	0.000282549	TP53/CCND1/PTEN/CCL2/CDKN1A/EP300	6
BP	GO:0001654	eye development	6/50	362/18670	0.000394411	0.00109427	0.000286491	VEGFA/JUN/STAT3/EGFR/HIF1A/TGFB1	6
BP	GO:0050671	positive regulation of lymphocyte proliferation	4/50	130/18670	0.00040335	0.00111814	0.00029274	IL6/IL2/CDKN1A/IL1B	4
BP	GO:0009755	hormone-mediated signaling pathway	5/50	235/18670	0.000404364	0.00111908	0.000292986	SRC/ESR1/JAK2/EP300/AR	5
BP	GO:0060560	developmental growth involved in morphogenesis	5/50	235/18670	0.000404364	0.00111908	0.000292986	VEGFA/ESR1/HSP90AA1/TGFB1/SPP1	5
BP	GO:0032210	regulation of telomere maintenance via telomerase	3/50	54/18670	0.000407183	0.00112407	0.000294293	MAPK3/MAPK1/SRC	3
BP	GO:0032655	regulation of interleukin-12 production	3/50	54/18670	0.000407183	0.00112407	0.000294293	IL10/MAPK14/IFNG	3
BP	GO:0097345	mitochondrial outer membrane permeabilization	3/50	54/18670	0.000407183	0.00112407	0.000294293	TP53/MAPK8/CASP8	3
BP	GO:0032946	positive regulation of mononuclear cell proliferation	4/50	131/18670	0.000415238	0.00114535	0.000299866	IL6/IL2/CDKN1A/IL1B	4
BP	GO:0150063	visual system development	6/50	366/18670	0.000418088	0.00115226	0.000301674	VEGFA/JUN/STAT3/EGFR/HIF1A/TGFB1	6
BP	GO:0003158	endothelium development	4/50	132/18670	0.000427375	0.00117688	0.000308119	VEGFA/TNF/IL1B/ICAM1	4
BP	GO:0010823	negative regulation of mitochondrion organization	3/50	55/18670	0.000429865	0.00118275	0.000309657	TP53/BCL2L1/AKT1	3
BP	GO:0045666	positive regulation of neuron differentiation	6/50	371/18670	0.000449236	0.001234	0.000323076	VEGFA/MTOR/PTEN/MAP2K1/IL2/EP300	6
BP	GO:0048880	sensory system development	6/50	371/18670	0.000449236	0.001234	0.000323076	VEGFA/JUN/STAT3/EGFR/HIF1A/TGFB1	6
BP	GO:0006165	nucleoside diphosphate phosphorylation	4/50	134/18670	0.000452405	0.00123603	0.000323605	TP53/STAT3/HIF1A/IFNG	4
BP	GO:0030260	entry into host cell	4/50	134/18670	0.000452405	0.00123603	0.000323605	EGFR/SRC/CXCL8/ICAM1	4
BP	GO:0044409	entry into host	4/50	134/18670	0.000452405	0.00123603	0.000323605	EGFR/SRC/CXCL8/ICAM1	4
BP	GO:0051806	entry into cell of other organism involved in symbiotic interaction	4/50	134/18670	0.000452405	0.00123603	0.000323605	EGFR/SRC/CXCL8/ICAM1	4
BP	GO:0051828	entry into other organism involved in symbiotic interaction	4/50	134/18670	0.000452405	0.00123603	0.000323605	EGFR/SRC/CXCL8/ICAM1	4
BP	GO:0002381	immunoglobulin production involved in immunoglobulin mediated immune response	3/50	56/18670	0.000453343	0.00123603	0.000323605	IL10/IL2/TGFB1	3
BP	GO:0006977	DNA damage response, signal transduction by p53 class mediator resulting in cell cycle arrest	3/50	56/18670	0.000453343	0.00123603	0.000323605	TP53/CDKN1A/EP300	3
BP	GO:0032615	interleukin-12 production	3/50	56/18670	0.000453343	0.00123603	0.000323605	IL10/MAPK14/IFNG	3
BP	GO:1903202	negative regulation of oxidative stress-induced cell death	3/50	56/18670	0.000453343	0.00123603	0.000323605	AKT1/IL10/HIF1A	3
BP	GO:0042593	glucose homeostasis	5/50	241/18670	0.000453693	0.00123603	0.000323605	STAT3/AKT1/IGF1R/ICAM1/HIF1A	5
BP	GO:0031392	regulation of prostaglandin biosynthetic process	2/50	12/18670	0.000456037	0.00123632	0.000323683	PTGS2/IL1B	2
BP	GO:0033197	response to vitamin E	2/50	12/18670	0.000456037	0.00123632	0.000323683	CCND1/CAT	2
BP	GO:0051549	positive regulation of keratinocyte migration	2/50	12/18670	0.000456037	0.00123632	0.000323683	MMP9/MTOR	2
BP	GO:0070243	regulation of thymocyte apoptotic process	2/50	12/18670	0.000456037	0.00123632	0.000323683	TP53/HIF1A	2
BP	GO:0072540	T-helper 17 cell lineage commitment	2/50	12/18670	0.000456037	0.00123632	0.000323683	IL6/STAT3	2
BP	GO:0150065	regulation of deacetylase activity	2/50	12/18670	0.000456037	0.00123632	0.000323683	VEGFA/MAPK8	2
BP	GO:0033500	carbohydrate homeostasis	5/50	242/18670	0.000462338	0.00125238	0.000327888	STAT3/AKT1/IGF1R/ICAM1/HIF1A	5
BP	GO:0060359	response to ammonium ion	4/50	135/18670	0.000465304	0.00125939	0.000329723	MAPK3/MAPK1/CASP3/MTOR	4
BP	GO:0010665	regulation of cardiac muscle cell apoptotic process	3/50	57/18670	0.000477629	0.00128334	0.000335992	TP53/PTEN/JAK2	3
BP	GO:0042743	hydrogen peroxide metabolic process	3/50	57/18670	0.000477629	0.00128334	0.000335992	STAT3/EGFR/CAT	3
BP	GO:0045981	positive regulation of nucleotide metabolic process	3/50	57/18670	0.000477629	0.00128334	0.000335992	STAT3/HIF1A/IFNG	3
BP	GO:0060043	regulation of cardiac muscle cell proliferation	3/50	57/18670	0.000477629	0.00128334	0.000335992	MAPK1/PTEN/MAPK14	3
BP	GO:0071398	cellular response to fatty acid	3/50	57/18670	0.000477629	0.00128334	0.000335992	SRC/AKT1/CREB1	3
BP	GO:0072431	signal transduction involved in mitotic G1 DNA damage checkpoint	3/50	57/18670	0.000477629	0.00128334	0.000335992	TP53/CDKN1A/EP300	3
BP	GO:1900408	negative regulation of cellular response to oxidative stress	3/50	57/18670	0.000477629	0.00128334	0.000335992	AKT1/IL10/HIF1A	3
BP	GO:1900544	positive regulation of purine nucleotide metabolic process	3/50	57/18670	0.000477629	0.00128334	0.000335992	STAT3/HIF1A/IFNG	3
BP	GO:1902400	intracellular signal transduction involved in G1 DNA damage checkpoint	3/50	57/18670	0.000477629	0.00128334	0.000335992	TP53/CDKN1A/EP300	3
BP	GO:0046939	nucleotide phosphorylation	4/50	136/18670	0.000478464	0.00128454	0.000336307	TP53/STAT3/HIF1A/IFNG	4
BP	GO:0031644	regulation of neurological system process	4/50	137/18670	0.000491888	0.00131952	0.000345463	SRC/MTOR/PTEN/IL10	4
BP	GO:0030520	intracellular estrogen receptor signaling pathway	3/50	58/18670	0.000502735	0.00134644	0.000352512	SRC/ESR1/AR	3
BP	GO:1903749	positive regulation of establishment of protein localization to mitochondrion	3/50	58/18670	0.000502735	0.00134644	0.000352512	TP53/MAPK8/CASP8	3
BP	GO:0009135	purine nucleoside diphosphate metabolic process	4/50	138/18670	0.000505578	0.00135187	0.000353935	TP53/STAT3/HIF1A/IFNG	4
BP	GO:0009179	purine ribonucleoside diphosphate metabolic process	4/50	138/18670	0.000505578	0.00135187	0.000353935	TP53/STAT3/HIF1A/IFNG	4
BP	GO:0046434	organophosphate catabolic process	5/50	248/18670	0.000516844	0.00138009	0.000361324	TP53/STAT3/PTEN/HIF1A/IFNG	5
BP	GO:0030900	forebrain development	6/50	381/18670	0.000516964	0.00138009	0.000361324	CASP3/EGFR/SRC/PTEN/CREB1/HIF1A	6
BP	GO:0002433	immune response-regulating cell surface receptor signaling pathway involved in phagocytosis	4/50	139/18670	0.000519537	0.00138141	0.000361669	MAPK3/MAPK1/SRC/HSP90AA1	4
BP	GO:0035304	regulation of protein dephosphorylation	4/50	139/18670	0.000519537	0.00138141	0.000361669	TNF/MTOR/JAK2/TGFB1	4
BP	GO:0038096	Fc-gamma receptor signaling pathway involved in phagocytosis	4/50	139/18670	0.000519537	0.00138141	0.000361669	MAPK3/MAPK1/SRC/HSP90AA1	4
BP	GO:0045580	regulation of T cell differentiation	4/50	139/18670	0.000519537	0.00138141	0.000361669	IL2/ERBB2/TGFB1/IFNG	4
BP	GO:0070665	positive regulation of leukocyte proliferation	4/50	139/18670	0.000519537	0.00138141	0.000361669	IL6/IL2/CDKN1A/IL1B	4
BP	GO:0001658	branching involved in ureteric bud morphogenesis	3/50	59/18670	0.000528671	0.00139675	0.000365685	VEGFA/MYC/TGFB1	3
BP	GO:0010662	regulation of striated muscle cell apoptotic process	3/50	59/18670	0.000528671	0.00139675	0.000365685	TP53/PTEN/JAK2	3
BP	GO:0032732	positive regulation of interleukin-1 production	3/50	59/18670	0.000528671	0.00139675	0.000365685	CASP8/JAK2/IFNG	3
BP	GO:0072413	signal transduction involved in mitotic cell cycle checkpoint	3/50	59/18670	0.000528671	0.00139675	0.000365685	TP53/CDKN1A/EP300	3
BP	GO:1902402	signal transduction involved in mitotic DNA damage checkpoint	3/50	59/18670	0.000528671	0.00139675	0.000365685	TP53/CDKN1A/EP300	3
BP	GO:1902403	signal transduction involved in mitotic DNA integrity checkpoint	3/50	59/18670	0.000528671	0.00139675	0.000365685	TP53/CDKN1A/EP300	3
BP	GO:1902883	negative regulation of response to oxidative stress	3/50	59/18670	0.000528671	0.00139675	0.000365685	AKT1/IL10/HIF1A	3
BP	GO:2000756	regulation of peptidyl-lysine acetylation	3/50	59/18670	0.000528671	0.00139675	0.000365685	MAPK3/IL1B/TGFB1	3
BP	GO:0006631	fatty acid metabolic process	6/50	383/18670	0.000531418	0.00140178	0.000367001	MAPK3/PTGS2/MTOR/AKT1/MAPK14/IL1B	6
BP	GO:0031346	positive regulation of cell projection organization	6/50	383/18670	0.000531418	0.00140178	0.000367001	VEGFA/SRC/MTOR/MAP2K1/IL2/EP300	6
BP	GO:0009185	ribonucleoside diphosphate metabolic process	4/50	140/18670	0.000533769	0.00140463	0.000367748	TP53/STAT3/HIF1A/IFNG	4
BP	GO:0034620	cellular response to unfolded protein	4/50	140/18670	0.000533769	0.00140463	0.000367748	CXCL8/CCND1/CCL2/EP300	4
BP	GO:1903364	positive regulation of cellular protein catabolic process	4/50	140/18670	0.000533769	0.00140463	0.000367748	EGF/PTEN/AKT1/HSP90AA1	4
BP	GO:0010763	positive regulation of fibroblast migration	2/50	13/18670	0.00053803	0.00140472	0.00036777	AKT1/TGFB1	2
BP	GO:0014842	regulation of skeletal muscle satellite cell proliferation	2/50	13/18670	0.00053803	0.00140472	0.00036777	STAT3/JAK2	2
BP	GO:0033127	regulation of histone phosphorylation	2/50	13/18670	0.00053803	0.00140472	0.00036777	MAPK3/IL1B	2
BP	GO:0048681	negative regulation of axon regeneration	2/50	13/18670	0.00053803	0.00140472	0.00036777	PTEN/SPP1	2
BP	GO:0050722	regulation of interleukin-1 beta biosynthetic process	2/50	13/18670	0.00053803	0.00140472	0.00036777	JAK2/IFNG	2
BP	GO:0060576	intestinal epithelial cell development	2/50	13/18670	0.00053803	0.00140472	0.00036777	CDKN1A/HIF1A	2
BP	GO:0061029	eyelid development in camera-type eye	2/50	13/18670	0.00053803	0.00140472	0.00036777	JUN/EGFR	2
BP	GO:0090594	inflammatory response to wounding	2/50	13/18670	0.00053803	0.00140472	0.00036777	HIF1A/TGFB1	2
BP	GO:1902947	regulation of tau-protein kinase activity	2/50	13/18670	0.00053803	0.00140472	0.00036777	HSP90AA1/IFNG	2
BP	GO:1903960	negative regulation of anion transmembrane transport	2/50	13/18670	0.00053803	0.00140472	0.00036777	MTOR/AKT1	2
BP	GO:0051271	negative regulation of cellular component movement	6/50	384/18670	0.000538762	0.00140552	0.000367981	STAT3/PTEN/AKT1/CCL2/TGFB1/SERPINE1	6
BP	GO:0042692	muscle cell differentiation	6/50	385/18670	0.000546185	0.00142377	0.000372758	VEGFA/CASP3/MTOR/AKT1/MAPK14/TGFB1	6
BP	GO:0008286	insulin receptor signaling pathway	4/50	141/18670	0.000548277	0.0014281	0.000373892	SRC/AKT1/IL1B/IGF1R	4
BP	GO:0010659	cardiac muscle cell apoptotic process	3/50	60/18670	0.00055545	0.00144001	0.00037701	TP53/PTEN/JAK2	3
BP	GO:0046324	regulation of glucose import	3/50	60/18670	0.00055545	0.00144001	0.00037701	TNF/AKT1/MAPK14	3
BP	GO:0051893	regulation of focal adhesion assembly	3/50	60/18670	0.00055545	0.00144001	0.00037701	VEGFA/SRC/PTEN	3
BP	GO:0090109	regulation of cell-substrate junction assembly	3/50	60/18670	0.00055545	0.00144001	0.00037701	VEGFA/SRC/PTEN	3
BP	GO:1902110	positive regulation of mitochondrial membrane permeability involved in apoptotic process	3/50	60/18670	0.00055545	0.00144001	0.00037701	TP53/MAPK8/CASP8	3
BP	GO:1902808	positive regulation of cell cycle G1/S phase transition	3/50	60/18670	0.00055545	0.00144001	0.00037701	EGFR/CCND1/AKT1	3
BP	GO:0038094	Fc-gamma receptor signaling pathway	4/50	142/18670	0.000563063	0.0014552	0.000380987	MAPK3/MAPK1/SRC/HSP90AA1	4
BP	GO:0050871	positive regulation of B cell activation	4/50	142/18670	0.000563063	0.0014552	0.000380987	IL6/IL2/CDKN1A/TGFB1	4
BP	GO:0072006	nephron development	4/50	142/18670	0.000563063	0.0014552	0.000380987	VEGFA/MYC/STAT1/TGFB1	4
BP	GO:1900542	regulation of purine nucleotide metabolic process	4/50	142/18670	0.000563063	0.0014552	0.000380987	TP53/STAT3/HIF1A/IFNG	4
BP	GO:0051924	regulation of calcium ion transport	5/50	254/18670	0.000576061	0.00148763	0.000389479	PTGS2/EGF/CCL2/ICAM1/TGFB1	5
BP	GO:0035296	regulation of tube diameter	4/50	143/18670	0.000578131	0.00148835	0.000389666	PTGS2/EGFR/AKT1/ICAM1	4
BP	GO:0044344	cellular response to fibroblast growth factor stimulus	4/50	143/18670	0.000578131	0.00148835	0.000389666	MAPK3/MAPK1/CXCL8/CCL2	4
BP	GO:0050880	regulation of blood vessel size	4/50	143/18670	0.000578131	0.00148835	0.000389666	PTGS2/EGFR/AKT1/ICAM1	4
BP	GO:0097746	regulation of blood vessel diameter	4/50	143/18670	0.000578131	0.00148835	0.000389666	PTGS2/EGFR/AKT1/ICAM1	4
BP	GO:0034113	heterotypic cell-cell adhesion	3/50	61/18670	0.000583083	0.00149878	0.000392395	TNF/IL10/IL1B	3
BP	GO:0045123	cellular extravasation	3/50	61/18670	0.000583083	0.00149878	0.000392395	TNF/CCL2/ICAM1	3
BP	GO:0035150	regulation of tube size	4/50	144/18670	0.000593483	0.00152433	0.000399086	PTGS2/EGFR/AKT1/ICAM1	4
BP	GO:0090596	sensory organ morphogenesis	5/50	256/18670	0.000596891	0.0015319	0.000401067	VEGFA/MAPK3/STAT3/MAPK1/HIF1A	5
BP	GO:0002431	Fc receptor mediated stimulatory signaling pathway	4/50	145/18670	0.000609123	0.00156115	0.000408726	MAPK3/MAPK1/SRC/HSP90AA1	4
BP	GO:0002562	somatic diversification of immune receptors via germline recombination within a single locus	3/50	62/18670	0.00061158	0.00156115	0.000408726	IL10/IL2/TGFB1	3
BP	GO:0010658	striated muscle cell apoptotic process	3/50	62/18670	0.00061158	0.00156115	0.000408726	TP53/PTEN/JAK2	3
BP	GO:0016444	somatic cell DNA recombination	3/50	62/18670	0.00061158	0.00156115	0.000408726	IL10/IL2/TGFB1	3
BP	GO:0070265	necrotic cell death	3/50	62/18670	0.00061158	0.00156115	0.000408726	TP53/TNF/CASP8	3
BP	GO:1902686	mitochondrial outer membrane permeabilization involved in programmed cell death	3/50	62/18670	0.00061158	0.00156115	0.000408726	TP53/MAPK8/CASP8	3
BP	GO:1904356	regulation of telomere maintenance via telomere lengthening	3/50	62/18670	0.00061158	0.00156115	0.000408726	MAPK3/MAPK1/SRC	3
BP	GO:0006140	regulation of nucleotide metabolic process	4/50	146/18670	0.000625054	0.00158615	0.000415272	TP53/STAT3/HIF1A/IFNG	4
BP	GO:0014841	skeletal muscle satellite cell proliferation	2/50	14/18670	0.000626628	0.00158615	0.000415272	STAT3/JAK2	2
BP	GO:0014854	response to inactivity	2/50	14/18670	0.000626628	0.00158615	0.000415272	IL10/CAT	2
BP	GO:0014857	regulation of skeletal muscle cell proliferation	2/50	14/18670	0.000626628	0.00158615	0.000415272	STAT3/JAK2	2
BP	GO:0020027	hemoglobin metabolic process	2/50	14/18670	0.000626628	0.00158615	0.000415272	CAT/HIF1A	2
BP	GO:0045651	positive regulation of macrophage differentiation	2/50	14/18670	0.000626628	0.00158615	0.000415272	CASP8/TGFB1	2
BP	GO:0050720	interleukin-1 beta biosynthetic process	2/50	14/18670	0.000626628	0.00158615	0.000415272	JAK2/IFNG	2
BP	GO:0050930	induction of positive chemotaxis	2/50	14/18670	0.000626628	0.00158615	0.000415272	VEGFA/CXCL8	2
BP	GO:0060397	JAK-STAT cascade involved in growth hormone signaling pathway	2/50	14/18670	0.000626628	0.00158615	0.000415272	STAT3/JAK2	2
BP	GO:1903351	cellular response to dopamine	2/50	14/18670	0.000626628	0.00158615	0.000415272	MAPK3/MAPK1	2
BP	GO:2001279	regulation of unsaturated fatty acid biosynthetic process	2/50	14/18670	0.000626628	0.00158615	0.000415272	PTGS2/IL1B	2
BP	GO:0040013	negative regulation of locomotion	6/50	396/18670	0.000633225	0.00160163	0.000419324	STAT3/PTEN/AKT1/CCL2/TGFB1/SERPINE1	6
BP	GO:0034394	protein localization to cell surface	3/50	63/18670	0.000640952	0.00161871	0.000423795	TNF/EGF/AKT1	3
BP	GO:0042982	amyloid precursor protein metabolic process	3/50	63/18670	0.000640952	0.00161871	0.000423795	TNF/CASP3/IFNG	3
BP	GO:0051604	protein maturation	6/50	397/18670	0.000641642	0.00161922	0.000423929	CASP3/SRC/CASP8/IL1B/EP300/SERPINE1	6
BP	GO:0009108	coenzyme biosynthetic process	5/50	261/18670	0.000651444	0.00164271	0.000430078	TP53/STAT3/PTGS2/HIF1A/IFNG	5
BP	GO:0008643	carbohydrate transport	4/50	148/18670	0.0006578	0.00165371	0.00043296	TNF/AKT1/MAPK14/IL1B	4
BP	GO:0035148	tube formation	4/50	148/18670	0.0006578	0.00165371	0.00043296	VEGFA/CASP3/HIF1A/TGFB1	4
BP	GO:0051592	response to calcium ion	4/50	148/18670	0.0006578	0.00165371	0.00043296	JUN/EGFR/CCND1/FOS	4
BP	GO:0061041	regulation of wound healing	4/50	148/18670	0.0006578	0.00165371	0.00043296	MTOR/PTEN/CDKN1A/SERPINE1	4
BP	GO:0010876	lipid localization	6/50	400/18670	0.000667419	0.00167663	0.000438959	IL6/TNF/EGF/AKT1/IL1B/SPP1	6
BP	GO:0006360	transcription by RNA polymerase I	3/50	64/18670	0.000671211	0.00168106	0.000440121	MAPK3/MTOR/ERBB2	3
BP	GO:0016445	somatic diversification of immunoglobulins	3/50	64/18670	0.000671211	0.00168106	0.000440121	IL10/IL2/TGFB1	3
BP	GO:0035794	positive regulation of mitochondrial membrane permeability	3/50	64/18670	0.000671211	0.00168106	0.000440121	TP53/MAPK8/CASP8	3
BP	GO:1903672	positive regulation of sprouting angiogenesis	3/50	64/18670	0.000671211	0.00168106	0.000440121	VEGFA/PTGS2/IL10	3
BP	GO:0016331	morphogenesis of embryonic epithelium	4/50	150/18670	0.000691746	0.00172859	0.000452562	CASP3/HIF1A/TGFB1/AR	4
BP	GO:0050777	negative regulation of immune response	4/50	150/18670	0.000691746	0.00172859	0.000452562	TNF/IL10/IL2/TGFB1	4
BP	GO:0071774	response to fibroblast growth factor	4/50	150/18670	0.000691746	0.00172859	0.000452562	MAPK3/MAPK1/CXCL8/CCL2	4
BP	GO:0002548	monocyte chemotaxis	3/50	65/18670	0.000702367	0.00175117	0.000458476	IL6/CCL2/SERPINE1	3
BP	GO:0032729	positive regulation of interferon-gamma production	3/50	65/18670	0.000702367	0.00175117	0.000458476	TNF/IL2/IL1B	3
BP	GO:0060675	ureteric bud morphogenesis	3/50	65/18670	0.000702367	0.00175117	0.000458476	VEGFA/MYC/TGFB1	3
BP	GO:0072331	signal transduction by p53 class mediator	5/50	267/18670	0.000721755	0.00177957	0.000465911	TP53/AKT1/MAPK14/CDKN1A/EP300	5
BP	GO:0010759	positive regulation of macrophage chemotaxis	2/50	15/18670	0.000721795	0.00177957	0.000465911	MAPK3/MAPK14	2
BP	GO:0014856	skeletal muscle cell proliferation	2/50	15/18670	0.000721795	0.00177957	0.000465911	STAT3/JAK2	2
BP	GO:0030730	sequestering of triglyceride	2/50	15/18670	0.000721795	0.00177957	0.000465911	TNF/IL1B	2
BP	GO:0030812	negative regulation of nucleotide catabolic process	2/50	15/18670	0.000721795	0.00177957	0.000465911	TP53/STAT3	2
BP	GO:0035635	entry of bacterium into host cell	2/50	15/18670	0.000721795	0.00177957	0.000465911	SRC/CXCL8	2
BP	GO:0045360	regulation of interleukin-1 biosynthetic process	2/50	15/18670	0.000721795	0.00177957	0.000465911	JAK2/IFNG	2
BP	GO:0045475	locomotor rhythm	2/50	15/18670	0.000721795	0.00177957	0.000465911	MTOR/PTEN	2
BP	GO:0051198	negative regulation of coenzyme metabolic process	2/50	15/18670	0.000721795	0.00177957	0.000465911	TP53/STAT3	2
BP	GO:0070571	negative regulation of neuron projection regeneration	2/50	15/18670	0.000721795	0.00177957	0.000465911	PTEN/SPP1	2
BP	GO:0071801	regulation of podosome assembly	2/50	15/18670	0.000721795	0.00177957	0.000465911	TNF/SRC	2
BP	GO:0072075	metanephric mesenchyme development	2/50	15/18670	0.000721795	0.00177957	0.000465911	MYC/STAT1	2
BP	GO:1900119	positive regulation of execution phase of apoptosis	2/50	15/18670	0.000721795	0.00177957	0.000465911	IL6/TP53	2
BP	GO:1903350	response to dopamine	2/50	15/18670	0.000721795	0.00177957	0.000465911	MAPK3/MAPK1	2
BP	GO:2000402	negative regulation of lymphocyte migration	2/50	15/18670	0.000721795	0.00177957	0.000465911	AKT1/CCL2	2
BP	GO:0051785	positive regulation of nuclear division	3/50	66/18670	0.000734431	0.00180269	0.000471965	EGF/IL1B/TGFB1	3
BP	GO:0051926	negative regulation of calcium ion transport	3/50	66/18670	0.000734431	0.00180269	0.000471965	PTGS2/ICAM1/TGFB1	3
BP	GO:0072171	mesonephric tubule morphogenesis	3/50	66/18670	0.000734431	0.00180269	0.000471965	VEGFA/MYC/TGFB1	3
BP	GO:1902108	regulation of mitochondrial membrane permeability involved in apoptotic process	3/50	66/18670	0.000734431	0.00180269	0.000471965	TP53/MAPK8/CASP8	3
BP	GO:1905207	regulation of cardiocyte differentiation	3/50	66/18670	0.000734431	0.00180269	0.000471965	EGFR/MTOR/TGFB1	3
BP	GO:1905710	positive regulation of membrane permeability	3/50	66/18670	0.000734431	0.00180269	0.000471965	TP53/MAPK8/CASP8	3
BP	GO:0050808	synapse organization	6/50	408/18670	0.000740107	0.00181528	0.000475261	TNF/PTEN/IL10/MAPK14/ERBB2/IGF1R	6
BP	GO:0030168	platelet activation	4/50	153/18670	0.000744969	0.00182586	0.00047803	MAPK3/IL6/MAPK1/SRC	4
BP	GO:0006090	pyruvate metabolic process	4/50	154/18670	0.000763336	0.0018695	0.000489455	TP53/STAT3/HIF1A/IFNG	4
BP	GO:0060038	cardiac muscle cell proliferation	3/50	67/18670	0.000767413	0.00187672	0.000491344	MAPK1/PTEN/MAPK14	3
BP	GO:1903391	regulation of adherens junction organization	3/50	67/18670	0.000767413	0.00187672	0.000491344	VEGFA/SRC/PTEN	3
BP	GO:0016573	histone acetylation	4/50	156/18670	0.000801029	0.00195103	0.0005108	MAPK3/IL1B/EP300/TGFB1	4
BP	GO:0010812	negative regulation of cell-substrate adhesion	3/50	68/18670	0.000801325	0.00195103	0.0005108	SRC/PTEN/SERPINE1	3
BP	GO:0019915	lipid storage	3/50	68/18670	0.000801325	0.00195103	0.0005108	IL6/TNF/IL1B	3
BP	GO:0035924	cellular response to vascular endothelial growth factor stimulus	3/50	68/18670	0.000801325	0.00195103	0.0005108	VEGFA/AKT1/MAPK14	3
BP	GO:0046323	glucose import	3/50	68/18670	0.000801325	0.00195103	0.0005108	TNF/AKT1/MAPK14	3
BP	GO:0071242	cellular response to ammonium ion	3/50	68/18670	0.000801325	0.00195103	0.0005108	MAPK3/MAPK1/CASP3	3
BP	GO:0002070	epithelial cell maturation	2/50	16/18670	0.000823498	0.00199623	0.000522635	CDKN1A/HIF1A	2
BP	GO:0006206	pyrimidine nucleobase metabolic process	2/50	16/18670	0.000823498	0.00199623	0.000522635	MAPK1/MTOR	2
BP	GO:0030889	negative regulation of B cell proliferation	2/50	16/18670	0.000823498	0.00199623	0.000522635	CASP3/IL10	2
BP	GO:0042222	interleukin-1 biosynthetic process	2/50	16/18670	0.000823498	0.00199623	0.000522635	JAK2/IFNG	2
BP	GO:0043217	myelin maintenance	2/50	16/18670	0.000823498	0.00199623	0.000522635	PTEN/AKT1	2
BP	GO:1900451	positive regulation of glutamate receptor signaling pathway	2/50	16/18670	0.000823498	0.00199623	0.000522635	CCL2/IFNG	2
BP	GO:0007411	axon guidance	5/50	276/18670	0.0008377	0.00202918	0.000531261	VEGFA/MAPK3/MAPK1/SRC/ERBB2	5
BP	GO:0009132	nucleoside diphosphate metabolic process	4/50	158/18670	0.00084002	0.00203183	0.000531956	TP53/STAT3/HIF1A/IFNG	4
BP	GO:0016482	cytosolic transport	4/50	158/18670	0.00084002	0.00203183	0.000531956	MAPK3/MAPK1/SRC/MAP2K1	4
BP	GO:0097485	neuron projection guidance	5/50	277/18670	0.000851393	0.00205784	0.000538765	VEGFA/MAPK3/MAPK1/SRC/ERBB2	5
BP	GO:0002673	regulation of acute inflammatory response	4/50	159/18670	0.00086001	0.00207716	0.000543822	IL6/TNF/PTGS2/IL1B	4
BP	GO:0060395	SMAD protein signal transduction	3/50	70/18670	0.000871976	0.00210453	0.000550988	JUN/FOS/TGFB1	3
BP	GO:0007519	skeletal muscle tissue development	4/50	160/18670	0.000880333	0.00212162	0.000555462	MAPK14/FOS/EP300/TGFB1	4
BP	GO:0030203	glycosaminoglycan metabolic process	4/50	160/18670	0.000880333	0.00212162	0.000555462	EGF/AKT1/IL1B/TGFB1	4
BP	GO:0009152	purine ribonucleotide biosynthetic process	5/50	280/18670	0.000893475	0.00215173	0.000563345	TP53/STAT3/HIF1A/TGFB1/IFNG	5
BP	GO:0018393	internal peptidyl-lysine acetylation	4/50	161/18670	0.000900994	0.00216669	0.000567263	MAPK3/IL1B/EP300/TGFB1	4
BP	GO:0035967	cellular response to topologically incorrect protein	4/50	161/18670	0.000900994	0.00216669	0.000567263	CXCL8/CCND1/CCL2/EP300	4
BP	GO:0010976	positive regulation of neuron projection development	5/50	281/18670	0.000907842	0.00218158	0.000571161	VEGFA/MTOR/MAP2K1/IL2/EP300	5
BP	GO:0006089	lactate metabolic process	2/50	17/18670	0.000931702	0.00221805	0.00058071	TP53/HIF1A	2
BP	GO:0006978	DNA damage response, signal transduction by p53 class mediator resulting in transcription of p21 class mediator	2/50	17/18670	0.000931702	0.00221805	0.00058071	TP53/CDKN1A	2
BP	GO:0010715	regulation of extracellular matrix disassembly	2/50	17/18670	0.000931702	0.00221805	0.00058071	IL6/TGFB1	2
BP	GO:0032460	negative regulation of protein oligomerization	2/50	17/18670	0.000931702	0.00221805	0.00058071	SRC/EP300	2
BP	GO:0035313	wound healing, spreading of epidermal cells	2/50	17/18670	0.000931702	0.00221805	0.00058071	MTOR/PTEN	2
BP	GO:0035729	cellular response to hepatocyte growth factor stimulus	2/50	17/18670	0.000931702	0.00221805	0.00058071	IL10/CREB1	2
BP	GO:0043923	positive regulation by host of viral transcription	2/50	17/18670	0.000931702	0.00221805	0.00058071	JUN/EP300	2
BP	GO:0060644	mammary gland epithelial cell differentiation	2/50	17/18670	0.000931702	0.00221805	0.00058071	AKT1/HIF1A	2
BP	GO:0070242	thymocyte apoptotic process	2/50	17/18670	0.000931702	0.00221805	0.00058071	TP53/HIF1A	2
BP	GO:0071850	mitotic cell cycle arrest	2/50	17/18670	0.000931702	0.00221805	0.00058071	TP53/CDKN1A	2
BP	GO:0090185	negative regulation of kidney development	2/50	17/18670	0.000931702	0.00221805	0.00058071	MMP9/STAT1	2
BP	GO:1904355	positive regulation of telomere capping	2/50	17/18670	0.000931702	0.00221805	0.00058071	MAPK3/MAPK1	2
BP	GO:1904996	positive regulation of leukocyte adhesion to vascular endothelial cell	2/50	17/18670	0.000931702	0.00221805	0.00058071	TNF/ICAM1	2
BP	GO:0031214	biomineral tissue development	4/50	163/18670	0.000943338	0.00224414	0.000587541	PTGS2/HIF1A/TGFB1/SPP1	4
BP	GO:0050805	negative regulation of synaptic transmission	3/50	72/18670	0.000946466	0.00224515	0.000587805	PTGS2/PTEN/IL1B	3
BP	GO:0051155	positive regulation of striated muscle cell differentiation	3/50	72/18670	0.000946466	0.00224515	0.000587805	MTOR/MAPK14/TGFB1	3
BP	GO:0051881	regulation of mitochondrial membrane potential	3/50	72/18670	0.000946466	0.00224515	0.000587805	SRC/BCL2L1/AKT1	3
BP	GO:1903747	regulation of establishment of protein localization to mitochondrion	3/50	72/18670	0.000946466	0.00224515	0.000587805	TP53/MAPK8/CASP8	3
BP	GO:0002312	B cell activation involved in immune response	3/50	73/18670	0.000985176	0.00232701	0.000609235	IL10/IL2/TGFB1	3
BP	GO:0006801	superoxide metabolic process	3/50	73/18670	0.000985176	0.00232701	0.000609235	TNF/EGFR/TGFB1	3
BP	GO:0045685	regulation of glial cell differentiation	3/50	73/18670	0.000985176	0.00232701	0.000609235	IL6/MTOR/TGFB1	3
BP	GO:0072401	signal transduction involved in DNA integrity checkpoint	3/50	73/18670	0.000985176	0.00232701	0.000609235	TP53/CDKN1A/EP300	3
BP	GO:0072422	signal transduction involved in DNA damage checkpoint	3/50	73/18670	0.000985176	0.00232701	0.000609235	TP53/CDKN1A/EP300	3
BP	GO:1901983	regulation of protein acetylation	3/50	73/18670	0.000985176	0.00232701	0.000609235	MAPK3/IL1B/TGFB1	3
BP	GO:0071695	anatomical structure maturation	4/50	165/18670	0.000987067	0.00232982	0.000609971	MTOR/MMP2/CDKN1A/HIF1A	4
BP	GO:0006475	internal protein amino acid acetylation	4/50	166/18670	0.00100946	0.00238097	0.000623365	MAPK3/IL1B/EP300/TGFB1	4
BP	GO:0060998	regulation of dendritic spine development	3/50	74/18670	0.00102488	0.00241049	0.000631092	MTOR/PTEN/IL2	3
BP	GO:0072078	nephron tubule morphogenesis	3/50	74/18670	0.00102488	0.00241049	0.000631092	VEGFA/MYC/TGFB1	3
BP	GO:0072395	signal transduction involved in cell cycle checkpoint	3/50	74/18670	0.00102488	0.00241049	0.000631092	TP53/CDKN1A/EP300	3
BP	GO:0099601	regulation of neurotransmitter receptor activity	3/50	74/18670	0.00102488	0.00241049	0.000631092	SRC/CCL2/IFNG	3
BP	GO:0033209	tumor necrosis factor-mediated signaling pathway	4/50	167/18670	0.00103221	0.00242601	0.000635156	TNF/CASP8/STAT1/JAK2	4
BP	GO:0034330	cell junction organization	5/50	290/18670	0.00104503	0.0024386	0.000638452	VEGFA/TNF/SRC/PTEN/TGFB1	5
BP	GO:0007221	positive regulation of transcription of Notch receptor target	2/50	18/18670	0.00104637	0.0024386	0.000638452	STAT1/EP300	2
BP	GO:0031998	regulation of fatty acid beta-oxidation	2/50	18/18670	0.00104637	0.0024386	0.000638452	MTOR/AKT1	2
BP	GO:0042772	DNA damage response, signal transduction resulting in transcription	2/50	18/18670	0.00104637	0.0024386	0.000638452	TP53/CDKN1A	2
BP	GO:0044320	cellular response to leptin stimulus	2/50	18/18670	0.00104637	0.0024386	0.000638452	STAT3/PTEN	2
BP	GO:0045780	positive regulation of bone resorption	2/50	18/18670	0.00104637	0.0024386	0.000638452	EGFR/SPP1	2
BP	GO:0046852	positive regulation of bone remodeling	2/50	18/18670	0.00104637	0.0024386	0.000638452	EGFR/SPP1	2
BP	GO:0051895	negative regulation of focal adhesion assembly	2/50	18/18670	0.00104637	0.0024386	0.000638452	SRC/PTEN	2
BP	GO:0070230	positive regulation of lymphocyte apoptotic process	2/50	18/18670	0.00104637	0.0024386	0.000638452	TP53/IL10	2
BP	GO:0090190	positive regulation of branching involved in ureteric bud morphogenesis	2/50	18/18670	0.00104637	0.0024386	0.000638452	VEGFA/TGFB1	2
BP	GO:1900221	regulation of amyloid-beta clearance	2/50	18/18670	0.00104637	0.0024386	0.000638452	TNF/IFNG	2
BP	GO:2000647	negative regulation of stem cell proliferation	2/50	18/18670	0.00104637	0.0024386	0.000638452	TP53/TGFB1	2
BP	GO:0002200	somatic diversification of immune receptors	3/50	75/18670	0.00106558	0.00247987	0.000649257	IL10/IL2/TGFB1	3
BP	GO:1903201	regulation of oxidative stress-induced cell death	3/50	75/18670	0.00106558	0.00247987	0.000649257	AKT1/IL10/HIF1A	3
BP	GO:0009410	response to xenobiotic stimulus	5/50	292/18670	0.0010775	0.00250358	0.000655464	EGFR/MTOR/CASP9/ICAM1/TGFB1	5
BP	GO:0018394	peptidyl-lysine acetylation	4/50	169/18670	0.00107878	0.00250358	0.000655464	MAPK3/IL1B/EP300/TGFB1	4
BP	GO:0045619	regulation of lymphocyte differentiation	4/50	169/18670	0.00107878	0.00250358	0.000655464	IL2/ERBB2/TGFB1/IFNG	4
BP	GO:0060538	skeletal muscle organ development	4/50	169/18670	0.00107878	0.00250358	0.000655464	MAPK14/FOS/EP300/TGFB1	4
BP	GO:0009260	ribonucleotide biosynthetic process	5/50	293/18670	0.00109402	0.00253717	0.000664259	TP53/STAT3/HIF1A/TGFB1/IFNG	5
BP	GO:0006022	aminoglycan metabolic process	4/50	170/18670	0.00110261	0.00255531	0.000669009	EGF/AKT1/IL1B/TGFB1	4
BP	GO:0001937	negative regulation of endothelial cell proliferation	3/50	76/18670	0.00110728	0.00256079	0.000670442	TNF/CCL2/STAT1	3
BP	GO:0007492	endoderm development	3/50	76/18670	0.00110728	0.00256079	0.000670442	MMP9/MMP2/TGFB1	3
BP	GO:0061045	negative regulation of wound healing	3/50	76/18670	0.00110728	0.00256079	0.000670442	PTEN/CDKN1A/SERPINE1	3
BP	GO:0001818	negative regulation of cytokine production	5/50	296/18670	0.00114469	0.00264546	0.000692609	IL6/TNF/IL10/TGFB1/IFNG	5
BP	GO:0021543	pallium development	4/50	172/18670	0.00115138	0.00265906	0.000696171	CASP3/EGFR/PTEN/HIF1A	4
BP	GO:0002544	chronic inflammatory response	2/50	19/18670	0.00116748	0.00266473	0.000697656	TNF/IL10	2
BP	GO:0002726	positive regulation of T cell cytokine production	2/50	19/18670	0.00116748	0.00266473	0.000697656	IL6/IL1B	2
BP	GO:0002922	positive regulation of humoral immune response	2/50	19/18670	0.00116748	0.00266473	0.000697656	TNF/IL1B	2
BP	GO:0010663	positive regulation of striated muscle cell apoptotic process	2/50	19/18670	0.00116748	0.00266473	0.000697656	TP53/PTEN	2
BP	GO:0010666	positive regulation of cardiac muscle cell apoptotic process	2/50	19/18670	0.00116748	0.00266473	0.000697656	TP53/PTEN	2
BP	GO:0010888	negative regulation of lipid storage	2/50	19/18670	0.00116748	0.00266473	0.000697656	IL6/TNF	2
BP	GO:0032700	negative regulation of interleukin-17 production	2/50	19/18670	0.00116748	0.00266473	0.000697656	TGFB1/IFNG	2
BP	GO:0032930	positive regulation of superoxide anion generation	2/50	19/18670	0.00116748	0.00266473	0.000697656	EGFR/TGFB1	2
BP	GO:0035728	response to hepatocyte growth factor	2/50	19/18670	0.00116748	0.00266473	0.000697656	IL10/CREB1	2
BP	GO:0042789	mRNA transcription by RNA polymerase II	2/50	19/18670	0.00116748	0.00266473	0.000697656	STAT3/HIF1A	2
BP	GO:0060716	labyrinthine layer blood vessel development	2/50	19/18670	0.00116748	0.00266473	0.000697656	MAPK1/AKT1	2
BP	GO:0071800	podosome assembly	2/50	19/18670	0.00116748	0.00266473	0.000697656	TNF/SRC	2
BP	GO:0072074	kidney mesenchyme development	2/50	19/18670	0.00116748	0.00266473	0.000697656	MYC/STAT1	2
BP	GO:0090201	negative regulation of release of cytochrome c from mitochondria	2/50	19/18670	0.00116748	0.00266473	0.000697656	BCL2L1/AKT1	2
BP	GO:1902176	negative regulation of oxidative stress-induced intrinsic apoptotic signaling pathway	2/50	19/18670	0.00116748	0.00266473	0.000697656	AKT1/HIF1A	2
BP	GO:2000010	positive regulation of protein localization to cell surface	2/50	19/18670	0.00116748	0.00266473	0.000697656	TNF/AKT1	2
BP	GO:2000696	regulation of epithelial cell differentiation involved in kidney development	2/50	19/18670	0.00116748	0.00266473	0.000697656	MMP9/STAT1	2
BP	GO:0061333	renal tubule morphogenesis	3/50	78/18670	0.00119377	0.00272101	0.000712389	VEGFA/MYC/TGFB1	3
BP	GO:0072332	intrinsic apoptotic signaling pathway by p53 class mediator	3/50	78/18670	0.00119377	0.00272101	0.000712389	TP53/CDKN1A/EP300	3
BP	GO:0006164	purine nucleotide biosynthetic process	5/50	300/18670	0.00121495	0.00276548	0.000724033	TP53/STAT3/HIF1A/TGFB1/IFNG	5
BP	GO:0046390	ribose phosphate biosynthetic process	5/50	300/18670	0.00121495	0.00276548	0.000724033	TP53/STAT3/HIF1A/TGFB1/IFNG	5
BP	GO:0010921	regulation of phosphatase activity	4/50	175/18670	0.00122735	0.00279179	0.000730921	TNF/MTOR/JAK2/IFNG	4
BP	GO:0003151	outflow tract morphogenesis	3/50	79/18670	0.00123856	0.00281538	0.000737096	VEGFA/JUN/HIF1A	3
BP	GO:0048469	cell maturation	4/50	177/18670	0.0012799	0.00290736	0.000761177	VEGFA/MTOR/CDKN1A/HIF1A	4
BP	GO:0042535	positive regulation of tumor necrosis factor biosynthetic process	2/50	20/18670	0.00129498	0.00292759	0.000766474	JAK2/IFNG	2
BP	GO:0045655	regulation of monocyte differentiation	2/50	20/18670	0.00129498	0.00292759	0.000766474	JUN/MYC	2
BP	GO:0060602	branch elongation of an epithelium	2/50	20/18670	0.00129498	0.00292759	0.000766474	ESR1/TGFB1	2
BP	GO:0071636	positive regulation of transforming growth factor beta production	2/50	20/18670	0.00129498	0.00292759	0.000766474	PTGS2/CREB1	2
BP	GO:0097709	connective tissue replacement	2/50	20/18670	0.00129498	0.00292759	0.000766474	HIF1A/TGFB1	2
BP	GO:1903204	negative regulation of oxidative stress-induced neuron death	2/50	20/18670	0.00129498	0.00292759	0.000766474	IL10/HIF1A	2
BP	GO:1905523	positive regulation of macrophage migration	2/50	20/18670	0.00129498	0.00292759	0.000766474	MAPK3/MAPK14	2
BP	GO:0046034	ATP metabolic process	5/50	305/18670	0.00130721	0.00295322	0.000773185	TP53/STAT3/HIF1A/TGFB1/IFNG	5
BP	GO:0007045	cell-substrate adherens junction assembly	3/50	81/18670	0.0013313	0.00299949	0.0007853	VEGFA/SRC/PTEN	3
BP	GO:0014032	neural crest cell development	3/50	81/18670	0.0013313	0.00299949	0.0007853	MAPK3/MAPK1/HIF1A	3
BP	GO:0048041	focal adhesion assembly	3/50	81/18670	0.0013313	0.00299949	0.0007853	VEGFA/SRC/PTEN	3
BP	GO:1902930	regulation of alcohol biosynthetic process	3/50	81/18670	0.0013313	0.00299949	0.0007853	TNF/IL1B/IFNG	3
BP	GO:0071466	cellular response to xenobiotic stimulus	4/50	180/18670	0.00136166	0.00306374	0.000802121	EGFR/CASP9/ICAM1/TGFB1	4
BP	GO:1901796	regulation of signal transduction by p53 class mediator	4/50	180/18670	0.00136166	0.00306374	0.000802121	TP53/AKT1/MAPK14/EP300	4
BP	GO:0030279	negative regulation of ossification	3/50	82/18670	0.00137927	0.00310125	0.00081194	TNF/HIF1A/TGFB1	3
BP	GO:0010565	regulation of cellular ketone metabolic process	4/50	181/18670	0.00138971	0.00312262	0.000817535	PTGS2/MTOR/AKT1/IL1B	4
BP	GO:0009166	nucleotide catabolic process	4/50	182/18670	0.00141816	0.00317617	0.000831556	TP53/STAT3/HIF1A/IFNG	4
BP	GO:0045582	positive regulation of T cell differentiation	3/50	83/18670	0.00142831	0.00317617	0.000831556	IL2/TGFB1/IFNG	3
BP	GO:0010829	negative regulation of glucose transmembrane transport	2/50	21/18670	0.00142885	0.00317617	0.000831556	TNF/IL1B	2
BP	GO:0032516	positive regulation of phosphoprotein phosphatase activity	2/50	21/18670	0.00142885	0.00317617	0.000831556	MTOR/JAK2	2
BP	GO:0032682	negative regulation of chemokine production	2/50	21/18670	0.00142885	0.00317617	0.000831556	IL6/IL10	2
BP	GO:0035162	embryonic hemopoiesis	2/50	21/18670	0.00142885	0.00317617	0.000831556	VEGFA/HIF1A	2
BP	GO:0035743	CD4-positive, alpha-beta T cell cytokine production	2/50	21/18670	0.00142885	0.00317617	0.000831556	IL6/IL1B	2
BP	GO:0036120	cellular response to platelet-derived growth factor stimulus	2/50	21/18670	0.00142885	0.00317617	0.000831556	SRC/CREB1	2
BP	GO:0036499	PERK-mediated unfolded protein response	2/50	21/18670	0.00142885	0.00317617	0.000831556	CXCL8/CCL2	2
BP	GO:0046716	muscle cell cellular homeostasis	2/50	21/18670	0.00142885	0.00317617	0.000831556	HIF1A/TGFB1	2
BP	GO:0046827	positive regulation of protein export from nucleus	2/50	21/18670	0.00142885	0.00317617	0.000831556	TP53/IL1B	2
BP	GO:0055093	response to hyperoxia	2/50	21/18670	0.00142885	0.00317617	0.000831556	CAT/CDKN1A	2
BP	GO:0061213	positive regulation of mesonephros development	2/50	21/18670	0.00142885	0.00317617	0.000831556	VEGFA/TGFB1	2
BP	GO:0071498	cellular response to fluid shear stress	2/50	21/18670	0.00142885	0.00317617	0.000831556	PTGS2/SRC	2
BP	GO:0072111	cell proliferation involved in kidney development	2/50	21/18670	0.00142885	0.00317617	0.000831556	MYC/STAT1	2
BP	GO:1903055	positive regulation of extracellular matrix organization	2/50	21/18670	0.00142885	0.00317617	0.000831556	IL6/TGFB1	2
BP	GO:0002040	sprouting angiogenesis	4/50	183/18670	0.00144701	0.00321011	0.000840441	VEGFA/PTGS2/AKT1/IL10	4
BP	GO:0043123	positive regulation of I-kappaB kinase/NF-kappaB signaling	4/50	183/18670	0.00144701	0.00321011	0.000840441	TNF/AKT1/CASP8/IL1B	4
BP	GO:0050770	regulation of axonogenesis	4/50	183/18670	0.00144701	0.00321011	0.000840441	VEGFA/PTEN/MAP2K1/SPP1	4
BP	GO:0072522	purine-containing compound biosynthetic process	5/50	313/18670	0.00146549	0.00324893	0.000850604	TP53/STAT3/HIF1A/TGFB1/IFNG	5
BP	GO:0045445	myoblast differentiation	3/50	84/18670	0.00147843	0.00327542	0.000857541	TNF/MAPK14/TGFB1	3
BP	GO:0043010	camera-type eye development	5/50	314/18670	0.00148623	0.00329051	0.00086149	VEGFA/JUN/EGFR/HIF1A/TGFB1	5
BP	GO:0007369	gastrulation	4/50	185/18670	0.00150595	0.00333195	0.00087234	TP53/MMP9/IL10/MMP2	4
BP	GO:0006898	receptor-mediated endocytosis	5/50	316/18670	0.00152835	0.00337762	0.000884298	VEGFA/EGF/CXCL8/HSP90AA1/SERPINE1	5
BP	GO:0014031	mesenchymal cell development	3/50	85/18670	0.00152964	0.00337762	0.000884298	MAPK3/MAPK1/HIF1A	3
BP	GO:0048864	stem cell development	3/50	85/18670	0.00152964	0.00337762	0.000884298	MAPK3/MAPK1/HIF1A	3
BP	GO:0030308	negative regulation of cell growth	4/50	186/18670	0.00153604	0.00338948	0.000887403	TP53/CDKN1A/TGFB1/SPP1	4
BP	GO:0048167	regulation of synaptic plasticity	4/50	187/18670	0.00156654	0.00343268	0.000898712	PTGS2/MAPK1/PTEN/CREB1	4
BP	GO:0002052	positive regulation of neuroblast proliferation	2/50	22/18670	0.00156905	0.00343268	0.000898712	VEGFA/HIF1A	2
BP	GO:0032928	regulation of superoxide anion generation	2/50	22/18670	0.00156905	0.00343268	0.000898712	EGFR/TGFB1	2
BP	GO:0036119	response to platelet-derived growth factor	2/50	22/18670	0.00156905	0.00343268	0.000898712	SRC/CREB1	2
BP	GO:0045649	regulation of macrophage differentiation	2/50	22/18670	0.00156905	0.00343268	0.000898712	CASP8/TGFB1	2
BP	GO:0045723	positive regulation of fatty acid biosynthetic process	2/50	22/18670	0.00156905	0.00343268	0.000898712	PTGS2/IL1B	2
BP	GO:0045943	positive regulation of transcription by RNA polymerase I	2/50	22/18670	0.00156905	0.00343268	0.000898712	MTOR/ERBB2	2
BP	GO:0050765	negative regulation of phagocytosis	2/50	22/18670	0.00156905	0.00343268	0.000898712	PTEN/TGFB1	2
BP	GO:0051195	negative regulation of cofactor metabolic process	2/50	22/18670	0.00156905	0.00343268	0.000898712	TP53/STAT3	2
BP	GO:0060065	uterus development	2/50	22/18670	0.00156905	0.00343268	0.000898712	SRC/ESR1	2
BP	GO:0060575	intestinal epithelial cell differentiation	2/50	22/18670	0.00156905	0.00343268	0.000898712	CDKN1A/HIF1A	2
BP	GO:0090189	regulation of branching involved in ureteric bud morphogenesis	2/50	22/18670	0.00156905	0.00343268	0.000898712	VEGFA/TGFB1	2
BP	GO:1903077	negative regulation of protein localization to plasma membrane	2/50	22/18670	0.00156905	0.00343268	0.000898712	BCL2L1/TGFB1	2
BP	GO:0048013	ephrin receptor signaling pathway	3/50	86/18670	0.00158196	0.00345637	0.000904916	MMP9/SRC/MMP2	3
BP	GO:0060291	long-term synaptic potentiation	3/50	86/18670	0.00158196	0.00345637	0.000904916	MAPK1/PTEN/CREB1	3
BP	GO:0043902	positive regulation of multi-organism process	4/50	188/18670	0.00159746	0.00348566	0.000912584	MAPK3/JUN/EP300/IFNG	4
BP	GO:1901292	nucleoside phosphate catabolic process	4/50	188/18670	0.00159746	0.00348566	0.000912584	TP53/STAT3/HIF1A/IFNG	4
BP	GO:0006112	energy reserve metabolic process	3/50	87/18670	0.00163539	0.00356606	0.000933634	MYC/MTOR/AKT1	3
BP	GO:0006470	protein dephosphorylation	5/50	321/18670	0.00163751	0.00356836	0.000934236	TNF/MTOR/PTEN/JAK2/TGFB1	5
BP	GO:0070098	chemokine-mediated signaling pathway	3/50	88/18670	0.00168993	0.00368017	0.000963509	CXCL8/CCL2/HIF1A	3
BP	GO:0006359	regulation of transcription by RNA polymerase III	2/50	23/18670	0.00171554	0.00372861	0.000976191	MTOR/AR	2
BP	GO:0045821	positive regulation of glycolytic process	2/50	23/18670	0.00171554	0.00372861	0.000976191	HIF1A/IFNG	2
BP	GO:0072215	regulation of metanephros development	2/50	23/18670	0.00171554	0.00372861	0.000976191	MYC/STAT1	2
BP	GO:0051188	cofactor biosynthetic process	5/50	326/18670	0.00175232	0.00380606	0.000996468	TP53/STAT3/PTGS2/HIF1A/IFNG	5
BP	GO:0070838	divalent metal ion transport	6/50	483/18670	0.00176056	0.00382144	0.00100049	PTGS2/EGF/CCL2/ICAM1/TGFB1/IFNG	6
BP	GO:0016485	protein processing	5/50	328/18670	0.00179987	0.00389955	0.00102095	CASP3/SRC/CASP8/IL1B/SERPINE1	5
BP	GO:0019058	viral life cycle	5/50	328/18670	0.00179987	0.00389955	0.00102095	TNF/EGFR/CXCL8/CCL2/ICAM1	5
BP	GO:0014033	neural crest cell differentiation	3/50	90/18670	0.00180241	0.00389955	0.00102095	MAPK3/MAPK1/HIF1A	3
BP	GO:0032651	regulation of interleukin-1 beta production	3/50	90/18670	0.00180241	0.00389955	0.00102095	CASP8/JAK2/IFNG	3
BP	GO:0034333	adherens junction assembly	3/50	90/18670	0.00180241	0.00389955	0.00102095	VEGFA/SRC/PTEN	3
BP	GO:1904063	negative regulation of cation transmembrane transport	3/50	91/18670	0.00186037	0.00402116	0.00105278	MMP9/PTEN/TGFB1	3
BP	GO:0002092	positive regulation of receptor internalization	2/50	24/18670	0.00186831	0.00402116	0.00105278	VEGFA/EGF	2
BP	GO:0002861	regulation of inflammatory response to antigenic stimulus	2/50	24/18670	0.00186831	0.00402116	0.00105278	TNF/IL10	2
BP	GO:0010288	response to lead ion	2/50	24/18670	0.00186831	0.00402116	0.00105278	PTGS2/CAT	2
BP	GO:0044346	fibroblast apoptotic process	2/50	24/18670	0.00186831	0.00402116	0.00105278	TP53/MYC	2
BP	GO:0060396	growth hormone receptor signaling pathway	2/50	24/18670	0.00186831	0.00402116	0.00105278	STAT3/JAK2	2
BP	GO:1904376	negative regulation of protein localization to cell periphery	2/50	24/18670	0.00186831	0.00402116	0.00105278	BCL2L1/TGFB1	2
BP	GO:2000178	negative regulation of neural precursor cell proliferation	2/50	24/18670	0.00186831	0.00402116	0.00105278	TP53/TGFB1	2
BP	GO:0072511	divalent inorganic cation transport	6/50	489/18670	0.00187378	0.00403033	0.00105518	PTGS2/EGF/CCL2/ICAM1/TGFB1/IFNG	6
BP	GO:0045833	negative regulation of lipid metabolic process	3/50	92/18670	0.00191947	0.00412593	0.00108021	TNF/AKT1/IL1B	3
BP	GO:0016042	lipid catabolic process	5/50	333/18670	0.00192287	0.00413057	0.00108143	TNF/MTOR/AKT1/IL1B/SPP1	5
BP	GO:0016052	carbohydrate catabolic process	4/50	199/18670	0.00196624	0.00422099	0.0011051	TP53/STAT3/HIF1A/IFNG	4
BP	GO:0009205	purine ribonucleoside triphosphate metabolic process	5/50	335/18670	0.00197376	0.00423168	0.0011079	TP53/STAT3/HIF1A/TGFB1/IFNG	5
BP	GO:0060070	canonical Wnt signaling pathway	5/50	335/18670	0.00197376	0.00423168	0.0011079	EGFR/EGF/SRC/PTEN/MAPK14	5
BP	GO:0019054	modulation by virus of host process	2/50	25/18670	0.0020273	0.00432135	0.00113138	BCL2L1/CASP8	2
BP	GO:0030813	positive regulation of nucleotide catabolic process	2/50	25/18670	0.0020273	0.00432135	0.00113138	HIF1A/IFNG	2
BP	GO:0032461	positive regulation of protein oligomerization	2/50	25/18670	0.0020273	0.00432135	0.00113138	TP53/MMP1	2
BP	GO:0045662	negative regulation of myoblast differentiation	2/50	25/18670	0.0020273	0.00432135	0.00113138	TNF/TGFB1	2
BP	GO:0045830	positive regulation of isotype switching	2/50	25/18670	0.0020273	0.00432135	0.00113138	IL2/TGFB1	2
BP	GO:0050927	positive regulation of positive chemotaxis	2/50	25/18670	0.0020273	0.00432135	0.00113138	VEGFA/CXCL8	2
BP	GO:0051197	positive regulation of coenzyme metabolic process	2/50	25/18670	0.0020273	0.00432135	0.00113138	HIF1A/IFNG	2
BP	GO:0061217	regulation of mesonephros development	2/50	25/18670	0.0020273	0.00432135	0.00113138	VEGFA/TGFB1	2
BP	GO:0071378	cellular response to growth hormone stimulus	2/50	25/18670	0.0020273	0.00432135	0.00113138	STAT3/JAK2	2
BP	GO:0045621	positive regulation of lymphocyte differentiation	3/50	94/18670	0.00204117	0.00434813	0.00113839	IL2/TGFB1/IFNG	3
BP	GO:0042119	neutrophil activation	6/50	498/18670	0.00205392	0.00437247	0.00114476	MAPK1/MMP9/CXCL8/MAPK14/CAT/HSP90AA1	6
BP	GO:0002446	neutrophil mediated immunity	6/50	499/18670	0.00207472	0.00441392	0.00115561	IL6/MAPK1/MMP9/MAPK14/CAT/HSP90AA1	6
BP	GO:0042102	positive regulation of T cell proliferation	3/50	95/18670	0.00210378	0.00446432	0.00116881	IL6/IL2/IL1B	3
BP	GO:0044070	regulation of anion transport	3/50	95/18670	0.00210378	0.00446432	0.00116881	MTOR/AKT1/IL1B	3
BP	GO:0050810	regulation of steroid biosynthetic process	3/50	95/18670	0.00210378	0.00446432	0.00116881	TNF/IL1B/IFNG	3
BP	GO:2000060	positive regulation of ubiquitin-dependent protein catabolic process	3/50	95/18670	0.00210378	0.00446432	0.00116881	EGF/PTEN/AKT1	3
BP	GO:0009167	purine ribonucleoside monophosphate metabolic process	5/50	340/18670	0.00210531	0.00446471	0.00116891	TP53/STAT3/HIF1A/TGFB1/IFNG	5
BP	GO:0009126	purine nucleoside monophosphate metabolic process	5/50	341/18670	0.00213237	0.00451633	0.00118242	TP53/STAT3/HIF1A/TGFB1/IFNG	5
BP	GO:0009199	ribonucleoside triphosphate metabolic process	5/50	341/18670	0.00213237	0.00451633	0.00118242	TP53/STAT3/HIF1A/TGFB1/IFNG	5
BP	GO:0006473	protein acetylation	4/50	204/18670	0.00215189	0.00454896	0.00119097	MAPK3/IL1B/EP300/TGFB1	4
BP	GO:0031396	regulation of protein ubiquitination	4/50	204/18670	0.00215189	0.00454896	0.00119097	MTOR/PTEN/AKT1/HSP90AA1	4
BP	GO:0034764	positive regulation of transmembrane transport	4/50	204/18670	0.00215189	0.00454896	0.00119097	AKT1/MAPK14/CCL2/IFNG	4
BP	GO:0009144	purine nucleoside triphosphate metabolic process	5/50	342/18670	0.00215969	0.00455964	0.00119376	TP53/STAT3/HIF1A/TGFB1/IFNG	5
BP	GO:1904062	regulation of cation transmembrane transport	5/50	342/18670	0.00215969	0.00455964	0.00119376	MMP9/PTEN/CCL2/TGFB1/IFNG	5
BP	GO:0090277	positive regulation of peptide hormone secretion	3/50	96/18670	0.00216758	0.0045734	0.00119736	EGFR/JAK2/HIF1A	3
BP	GO:0006309	apoptotic DNA fragmentation	2/50	26/18670	0.00219249	0.00459096	0.00120196	IL6/CASP3	2
BP	GO:0010758	regulation of macrophage chemotaxis	2/50	26/18670	0.00219249	0.00459096	0.00120196	MAPK3/MAPK14	2
BP	GO:0031645	negative regulation of neurological system process	2/50	26/18670	0.00219249	0.00459096	0.00120196	PTEN/IL10	2
BP	GO:0031954	positive regulation of protein autophosphorylation	2/50	26/18670	0.00219249	0.00459096	0.00120196	VEGFA/SRC	2
BP	GO:0050926	regulation of positive chemotaxis	2/50	26/18670	0.00219249	0.00459096	0.00120196	VEGFA/CXCL8	2
BP	GO:0060706	cell differentiation involved in embryonic placenta development	2/50	26/18670	0.00219249	0.00459096	0.00120196	AKT1/CASP8	2
BP	GO:0060740	prostate gland epithelium morphogenesis	2/50	26/18670	0.00219249	0.00459096	0.00120196	ESR1/AR	2
BP	GO:1900120	regulation of receptor binding	2/50	26/18670	0.00219249	0.00459096	0.00120196	MMP9/IL10	2
BP	GO:1903203	regulation of oxidative stress-induced neuron death	2/50	26/18670	0.00219249	0.00459096	0.00120196	IL10/HIF1A	2
BP	GO:1903579	negative regulation of ATP metabolic process	2/50	26/18670	0.00219249	0.00459096	0.00120196	TP53/STAT3	2
BP	GO:1903959	regulation of anion transmembrane transport	2/50	26/18670	0.00219249	0.00459096	0.00120196	MTOR/AKT1	2
BP	GO:1904353	regulation of telomere capping	2/50	26/18670	0.00219249	0.00459096	0.00120196	MAPK3/MAPK1	2
BP	GO:0007044	cell-substrate junction assembly	3/50	97/18670	0.00223257	0.00465433	0.00121855	VEGFA/SRC/PTEN	3
BP	GO:0014020	primary neural tube formation	3/50	97/18670	0.00223257	0.00465433	0.00121855	CASP3/HIF1A/TGFB1	3
BP	GO:0051591	response to cAMP	3/50	97/18670	0.00223257	0.00465433	0.00121855	JUN/FOS/STAT1	3
BP	GO:0060996	dendritic spine development	3/50	97/18670	0.00223257	0.00465433	0.00121855	MTOR/PTEN/IL2	3
BP	GO:0120162	positive regulation of cold-induced thermogenesis	3/50	97/18670	0.00223257	0.00465433	0.00121855	VEGFA/JAK2/IGF1R	3
BP	GO:1990868	response to chemokine	3/50	97/18670	0.00223257	0.00465433	0.00121855	CXCL8/CCL2/HIF1A	3
BP	GO:1990869	cellular response to chemokine	3/50	97/18670	0.00223257	0.00465433	0.00121855	CXCL8/CCL2/HIF1A	3
BP	GO:0002042	cell migration involved in sprouting angiogenesis	3/50	98/18670	0.00229876	0.00478931	0.00125389	VEGFA/PTGS2/AKT1	3
BP	GO:0051216	cartilage development	4/50	209/18670	0.00234933	0.00489162	0.00128068	MAPK3/MAPK14/HIF1A/TGFB1	4
BP	GO:0009651	response to salt stress	2/50	27/18670	0.00236385	0.0048929	0.00128101	TP53/TNF	2
BP	GO:0035902	response to immobilization stress	2/50	27/18670	0.00236385	0.0048929	0.00128101	FOS/TGFB1	2
BP	GO:0036475	neuron death in response to oxidative stress	2/50	27/18670	0.00236385	0.0048929	0.00128101	IL10/HIF1A	2
BP	GO:0043921	modulation by host of viral transcription	2/50	27/18670	0.00236385	0.0048929	0.00128101	JUN/EP300	2
BP	GO:0052472	modulation by host of symbiont transcription	2/50	27/18670	0.00236385	0.0048929	0.00128101	JUN/EP300	2
BP	GO:0060259	regulation of feeding behavior	2/50	27/18670	0.00236385	0.0048929	0.00128101	STAT3/MTOR	2
BP	GO:1902175	regulation of oxidative stress-induced intrinsic apoptotic signaling pathway	2/50	27/18670	0.00236385	0.0048929	0.00128101	AKT1/HIF1A	2
BP	GO:2000191	regulation of fatty acid transport	2/50	27/18670	0.00236385	0.0048929	0.00128101	AKT1/IL1B	2
BP	GO:0019395	fatty acid oxidation	3/50	99/18670	0.00236615	0.0048929	0.00128101	MTOR/AKT1/MAPK14	3
BP	GO:0048525	negative regulation of viral process	3/50	99/18670	0.00236615	0.0048929	0.00128101	JUN/TNF/STAT1	3
BP	GO:0070301	cellular response to hydrogen peroxide	3/50	99/18670	0.00236615	0.0048929	0.00128101	IL6/SRC/IL10	3
BP	GO:0070498	interleukin-1-mediated signaling pathway	3/50	100/18670	0.00243476	0.00503164	0.00131734	MAPK3/IL6/IL1B	3
BP	GO:0000018	regulation of DNA recombination	3/50	101/18670	0.0025046	0.00516632	0.0013526	IL10/IL2/TGFB1	3
BP	GO:0007631	feeding behavior	3/50	101/18670	0.0025046	0.00516632	0.0013526	STAT3/MTOR/FOS	3
BP	GO:0034440	lipid oxidation	3/50	101/18670	0.0025046	0.00516632	0.0013526	MTOR/AKT1/MAPK14	3
BP	GO:0009161	ribonucleoside monophosphate metabolic process	5/50	354/18670	0.0025078	0.0051665	0.00135265	TP53/STAT3/HIF1A/TGFB1/IFNG	5
BP	GO:0031589	cell-substrate adhesion	5/50	354/18670	0.0025078	0.0051665	0.00135265	VEGFA/SRC/PTEN/JAK2/SERPINE1	5
BP	GO:0001516	prostaglandin biosynthetic process	2/50	28/18670	0.00254134	0.00519052	0.00135893	PTGS2/IL1B	2
BP	GO:0001773	myeloid dendritic cell activation	2/50	28/18670	0.00254134	0.00519052	0.00135893	IL10/TGFB1	2
BP	GO:0008209	androgen metabolic process	2/50	28/18670	0.00254134	0.00519052	0.00135893	ESR1/SPP1	2
BP	GO:0032647	regulation of interferon-alpha production	2/50	28/18670	0.00254134	0.00519052	0.00135893	IL10/STAT1	2
BP	GO:0036296	response to increased oxygen levels	2/50	28/18670	0.00254134	0.00519052	0.00135893	CAT/CDKN1A	2
BP	GO:0046457	prostanoid biosynthetic process	2/50	28/18670	0.00254134	0.00519052	0.00135893	PTGS2/IL1B	2
BP	GO:0052312	modulation of transcription in other organism involved in symbiotic interaction	2/50	28/18670	0.00254134	0.00519052	0.00135893	JUN/EP300	2
BP	GO:0060512	prostate gland morphogenesis	2/50	28/18670	0.00254134	0.00519052	0.00135893	ESR1/AR	2
BP	GO:1900543	negative regulation of purine nucleotide metabolic process	2/50	28/18670	0.00254134	0.00519052	0.00135893	TP53/STAT3	2
BP	GO:1902745	positive regulation of lamellipodium organization	2/50	28/18670	0.00254134	0.00519052	0.00135893	SRC/MTOR	2
BP	GO:1903792	negative regulation of anion transport	2/50	28/18670	0.00254134	0.00519052	0.00135893	MTOR/AKT1	2
BP	GO:1904994	regulation of leukocyte adhesion to vascular endothelial cell	2/50	28/18670	0.00254134	0.00519052	0.00135893	TNF/ICAM1	2
BP	GO:1990776	response to angiotensin	2/50	28/18670	0.00254134	0.00519052	0.00135893	PTGS2/SRC	2
BP	GO:2000108	positive regulation of leukocyte apoptotic process	2/50	28/18670	0.00254134	0.00519052	0.00135893	TP53/IL10	2
BP	GO:0098869	cellular oxidant detoxification	3/50	102/18670	0.00257566	0.0052574	0.00137644	TNF/PTGS2/CAT	3
BP	GO:0022412	cellular process involved in reproduction in multicellular organism	5/50	357/18670	0.00260086	0.00530557	0.00138906	SRC/BCL2L1/MTOR/AKT1/TGFB1	5
BP	GO:0048259	regulation of receptor-mediated endocytosis	3/50	103/18670	0.00264797	0.00539503	0.00141248	VEGFA/EGF/SERPINE1	3
BP	GO:1902106	negative regulation of leukocyte differentiation	3/50	103/18670	0.00264797	0.00539503	0.00141248	MYC/IL2/ERBB2	3
BP	GO:0060348	bone development	4/50	217/18670	0.00269072	0.00547877	0.0014344	TP53/SRC/EP300/TGFB1	4
BP	GO:0030593	neutrophil chemotaxis	3/50	104/18670	0.00272152	0.00551462	0.00144379	CXCL8/CCL2/IL1B	3
BP	GO:0005979	regulation of glycogen biosynthetic process	2/50	29/18670	0.00272493	0.00551462	0.00144379	MTOR/AKT1	2
BP	GO:0007263	nitric oxide mediated signal transduction	2/50	29/18670	0.00272493	0.00551462	0.00144379	VEGFA/EGFR	2
BP	GO:0010954	positive regulation of protein processing	2/50	29/18670	0.00272493	0.00551462	0.00144379	SRC/IL1B	2
BP	GO:0010962	regulation of glucan biosynthetic process	2/50	29/18670	0.00272493	0.00551462	0.00144379	MTOR/AKT1	2
BP	GO:0044068	modulation by symbiont of host cellular process	2/50	29/18670	0.00272493	0.00551462	0.00144379	BCL2L1/CASP8	2
BP	GO:0045822	negative regulation of heart contraction	2/50	29/18670	0.00272493	0.00551462	0.00144379	IL2/JAK2	2
BP	GO:0045980	negative regulation of nucleotide metabolic process	2/50	29/18670	0.00272493	0.00551462	0.00144379	TP53/STAT3	2
BP	GO:0070229	negative regulation of lymphocyte apoptotic process	2/50	29/18670	0.00272493	0.00551462	0.00144379	IL2/HIF1A	2
BP	GO:2000727	positive regulation of cardiac muscle cell differentiation	2/50	29/18670	0.00272493	0.00551462	0.00144379	MTOR/TGFB1	2
BP	GO:0016064	immunoglobulin mediated immune response	4/50	218/18670	0.00273566	0.00552623	0.00144683	TNF/IL10/IL2/TGFB1	4
BP	GO:0019722	calcium-mediated signaling	4/50	218/18670	0.00273566	0.00552623	0.00144683	TNF/EGFR/CXCL8/MTOR	4
BP	GO:0050807	regulation of synapse organization	4/50	218/18670	0.00273566	0.00552623	0.00144683	TNF/PTEN/IL10/MAPK14	4
BP	GO:0009141	nucleoside triphosphate metabolic process	5/50	362/18670	0.00276153	0.00557509	0.00145962	TP53/STAT3/HIF1A/TGFB1/IFNG	5
BP	GO:0030111	regulation of Wnt signaling pathway	5/50	363/18670	0.00279451	0.00563505	0.00147532	EGFR/EGF/SRC/MAPK14/ESR1	5
BP	GO:0001841	neural tube formation	3/50	105/18670	0.00279632	0.00563505	0.00147532	CASP3/HIF1A/TGFB1	3
BP	GO:0007009	plasma membrane organization	3/50	105/18670	0.00279632	0.00563505	0.00147532	PTEN/AKT1/AR	3
BP	GO:0006066	alcohol metabolic process	5/50	364/18670	0.00282777	0.00569498	0.00149101	TNF/PTEN/CAT/IL1B/IFNG	5
BP	GO:0002456	T cell mediated immunity	3/50	106/18670	0.00287238	0.00578021	0.00151332	IL6/IL1B/ICAM1	3
BP	GO:0019724	B cell mediated immunity	4/50	221/18670	0.00287357	0.00578021	0.00151332	TNF/IL10/IL2/TGFB1	4
BP	GO:0001782	B cell homeostasis	2/50	30/18670	0.00291459	0.00582742	0.00152568	CASP3/HIF1A	2
BP	GO:0032607	interferon-alpha production	2/50	30/18670	0.00291459	0.00582742	0.00152568	IL10/STAT1	2
BP	GO:0045948	positive regulation of translational initiation	2/50	30/18670	0.00291459	0.00582742	0.00152568	TNF/MTOR	2
BP	GO:0046320	regulation of fatty acid oxidation	2/50	30/18670	0.00291459	0.00582742	0.00152568	MTOR/AKT1	2
BP	GO:0048147	negative regulation of fibroblast proliferation	2/50	30/18670	0.00291459	0.00582742	0.00152568	TP53/MYC	2
BP	GO:0050869	negative regulation of B cell activation	2/50	30/18670	0.00291459	0.00582742	0.00152568	CASP3/IL10	2
BP	GO:0070168	negative regulation of biomineral tissue development	2/50	30/18670	0.00291459	0.00582742	0.00152568	HIF1A/TGFB1	2
BP	GO:0090200	positive regulation of release of cytochrome c from mitochondria	2/50	30/18670	0.00291459	0.00582742	0.00152568	TP53/MMP9	2
BP	GO:1904837	beta-catenin-TCF complex assembly	2/50	30/18670	0.00291459	0.00582742	0.00152568	MYC/EP300	2
BP	GO:1905476	negative regulation of protein localization to membrane	2/50	30/18670	0.00291459	0.00582742	0.00152568	BCL2L1/TGFB1	2
BP	GO:0030330	DNA damage response, signal transduction by p53 class mediator	3/50	107/18670	0.0029497	0.00589408	0.00154313	TP53/CDKN1A/EP300	3
BP	GO:0006275	regulation of DNA replication	3/50	108/18670	0.0030283	0.0060475	0.0015833	TP53/JUN/EGFR	3
BP	GO:0007160	cell-matrix adhesion	4/50	225/18670	0.00306478	0.00611666	0.00160141	VEGFA/SRC/PTEN/SERPINE1	4
BP	GO:0051149	positive regulation of muscle cell differentiation	3/50	109/18670	0.00310818	0.00617777	0.00161741	MTOR/MAPK14/TGFB1	3
BP	GO:0002724	regulation of T cell cytokine production	2/50	31/18670	0.00311028	0.00617777	0.00161741	IL6/IL1B	2
BP	GO:0003401	axis elongation	2/50	31/18670	0.00311028	0.00617777	0.00161741	ESR1/TGFB1	2
BP	GO:0010762	regulation of fibroblast migration	2/50	31/18670	0.00311028	0.00617777	0.00161741	AKT1/TGFB1	2
BP	GO:0043457	regulation of cellular respiration	2/50	31/18670	0.00311028	0.00617777	0.00161741	HIF1A/IFNG	2
BP	GO:0044319	wound healing, spreading of cells	2/50	31/18670	0.00311028	0.00617777	0.00161741	MTOR/PTEN	2
BP	GO:0090505	epiboly involved in wound healing	2/50	31/18670	0.00311028	0.00617777	0.00161741	MTOR/PTEN	2
BP	GO:1903319	positive regulation of protein maturation	2/50	31/18670	0.00311028	0.00617777	0.00161741	SRC/IL1B	2
BP	GO:0034404	nucleobase-containing small molecule biosynthetic process	4/50	226/18670	0.00311391	0.00618128	0.00161833	TP53/STAT3/HIF1A/IFNG	4
BP	GO:0050803	regulation of synapse structure or activity	4/50	227/18670	0.00316357	0.00627612	0.00164316	TNF/PTEN/IL10/MAPK14	4
BP	GO:0006024	glycosaminoglycan biosynthetic process	3/50	110/18670	0.00318935	0.00631971	0.00165457	EGF/IL1B/TGFB1	3
BP	GO:0033559	unsaturated fatty acid metabolic process	3/50	110/18670	0.00318935	0.00631971	0.00165457	MAPK3/PTGS2/IL1B	3
BP	GO:0009123	nucleoside monophosphate metabolic process	5/50	375/18670	0.00321293	0.00636264	0.00166581	TP53/STAT3/HIF1A/TGFB1/IFNG	5
BP	GO:0031623	receptor internalization	3/50	111/18670	0.00327181	0.00647152	0.00169432	VEGFA/EGF/CXCL8	3
BP	GO:0072676	lymphocyte migration	3/50	111/18670	0.00327181	0.00647152	0.00169432	AKT1/CCL2/ICAM1	3
BP	GO:0006356	regulation of transcription by RNA polymerase I	2/50	32/18670	0.00331197	0.00652763	0.001709	MTOR/ERBB2	2
BP	GO:0043552	positive regulation of phosphatidylinositol 3-kinase activity	2/50	32/18670	0.00331197	0.00652763	0.001709	SRC/TGFB1	2
BP	GO:0046685	response to arsenic-containing substance	2/50	32/18670	0.00331197	0.00652763	0.001709	PTEN/CDKN1A	2
BP	GO:0090504	epiboly	2/50	32/18670	0.00331197	0.00652763	0.001709	MTOR/PTEN	2
BP	GO:1900745	positive regulation of p38MAPK cascade	2/50	32/18670	0.00331197	0.00652763	0.001709	VEGFA/IL1B	2
BP	GO:2000778	positive regulation of interleukin-6 secretion	2/50	32/18670	0.00331197	0.00652763	0.001709	TNF/IL1B	2
BP	GO:0002065	columnar/cuboidal epithelial cell differentiation	3/50	112/18670	0.00335557	0.00659791	0.0017274	CDKN1A/HIF1A/SERPINE1	3
BP	GO:0042303	molting cycle	3/50	112/18670	0.00335557	0.00659791	0.0017274	TNF/PTGS2/EGFR	3
BP	GO:0042633	hair cycle	3/50	112/18670	0.00335557	0.00659791	0.0017274	TNF/PTGS2/EGFR	3
BP	GO:1990748	cellular detoxification	3/50	112/18670	0.00335557	0.00659791	0.0017274	TNF/PTGS2/CAT	3
BP	GO:1903320	regulation of protein modification by small protein conjugation or removal	4/50	231/18670	0.00336766	0.00661775	0.0017326	MTOR/PTEN/AKT1/HSP90AA1	4
BP	GO:0048640	negative regulation of developmental growth	3/50	113/18670	0.00344064	0.00675717	0.0017691	PTEN/CDKN1A/SPP1	3
BP	GO:0009303	rRNA transcription	2/50	33/18670	0.00351964	0.00687976	0.0018012	TP53/MTOR	2
BP	GO:0010039	response to iron ion	2/50	33/18670	0.00351964	0.00687976	0.0018012	CCND1/HIF1A	2
BP	GO:0033028	myeloid cell apoptotic process	2/50	33/18670	0.00351964	0.00687976	0.0018012	IL6/PTEN	2
BP	GO:0042755	eating behavior	2/50	33/18670	0.00351964	0.00687976	0.0018012	STAT3/MTOR	2
BP	GO:0048011	neurotrophin TRK receptor signaling pathway	2/50	33/18670	0.00351964	0.00687976	0.0018012	CASP3/SRC	2
BP	GO:0051194	positive regulation of cofactor metabolic process	2/50	33/18670	0.00351964	0.00687976	0.0018012	HIF1A/IFNG	2
BP	GO:0070232	regulation of T cell apoptotic process	2/50	33/18670	0.00351964	0.00687976	0.0018012	TP53/HIF1A	2
BP	GO:2000352	negative regulation of endothelial cell apoptotic process	2/50	33/18670	0.00351964	0.00687976	0.0018012	ICAM1/SERPINE1	2
BP	GO:0048588	developmental cell growth	4/50	234/18670	0.0035265	0.00688205	0.00180179	VEGFA/MTOR/HSP90AA1/SPP1	4
BP	GO:0006690	icosanoid metabolic process	3/50	114/18670	0.00352702	0.00688205	0.00180179	MAPK3/PTGS2/IL1B	3
BP	GO:0030282	bone mineralization	3/50	114/18670	0.00352702	0.00688205	0.00180179	PTGS2/HIF1A/TGFB1	3
BP	GO:0006023	aminoglycan biosynthetic process	3/50	115/18670	0.00361473	0.00704903	0.00184551	EGF/IL1B/TGFB1	3
BP	GO:0000737	DNA catabolic process, endonucleolytic	2/50	34/18670	0.00373324	0.00725034	0.00189822	IL6/CASP3	2
BP	GO:0032212	positive regulation of telomere maintenance via telomerase	2/50	34/18670	0.00373324	0.00725034	0.00189822	MAPK3/MAPK1	2
BP	GO:0048566	embryonic digestive tract development	2/50	34/18670	0.00373324	0.00725034	0.00189822	TNF/CXCL8	2
BP	GO:0070884	regulation of calcineurin-NFAT signaling cascade	2/50	34/18670	0.00373324	0.00725034	0.00189822	TNF/MTOR	2
BP	GO:0071868	cellular response to monoamine stimulus	2/50	34/18670	0.00373324	0.00725034	0.00189822	MAPK3/MAPK1	2
BP	GO:0071870	cellular response to catecholamine stimulus	2/50	34/18670	0.00373324	0.00725034	0.00189822	MAPK3/MAPK1	2
BP	GO:0106056	regulation of calcineurin-mediated signaling	2/50	34/18670	0.00373324	0.00725034	0.00189822	TNF/MTOR	2
BP	GO:0030258	lipid modification	4/50	238/18670	0.00374614	0.00726266	0.00190144	MTOR/PTEN/AKT1/MAPK14	4
BP	GO:0051048	negative regulation of secretion	4/50	238/18670	0.00374614	0.00726266	0.00190144	TNF/EGF/IL10/IL1B	4
BP	GO:0051607	defense response to virus	4/50	238/18670	0.00374614	0.00726266	0.00190144	IL6/STAT1/IL1B/IFNG	4
BP	GO:0010508	positive regulation of autophagy	3/50	117/18670	0.00379411	0.0073428	0.00192243	MAPK3/HIF1A/IFNG	3
BP	GO:0043666	regulation of phosphoprotein phosphatase activity	3/50	117/18670	0.00379411	0.0073428	0.00192243	TNF/MTOR/JAK2	3
BP	GO:0051153	regulation of striated muscle cell differentiation	3/50	117/18670	0.00379411	0.0073428	0.00192243	MTOR/MAPK14/TGFB1	3
BP	GO:1990266	neutrophil migration	3/50	118/18670	0.00388581	0.00751589	0.00196774	CXCL8/CCL2/IL1B	3
BP	GO:0034329	cell junction assembly	4/50	241/18670	0.00391685	0.00757152	0.00198231	VEGFA/TNF/SRC/PTEN	4
BP	GO:0021955	central nervous system neuron axonogenesis	2/50	35/18670	0.00395275	0.00760989	0.00199235	PTEN/HSP90AA1	2
BP	GO:0030262	apoptotic nuclear changes	2/50	35/18670	0.00395275	0.00760989	0.00199235	IL6/CASP3	2
BP	GO:0032735	positive regulation of interleukin-12 production	2/50	35/18670	0.00395275	0.00760989	0.00199235	MAPK14/IFNG	2
BP	GO:0042092	type 2 immune response	2/50	35/18670	0.00395275	0.00760989	0.00199235	IL6/IL10	2
BP	GO:0070873	regulation of glycogen metabolic process	2/50	35/18670	0.00395275	0.00760989	0.00199235	MTOR/AKT1	2
BP	GO:0098751	bone cell development	2/50	35/18670	0.00395275	0.00760989	0.00199235	SRC/EP300	2
BP	GO:0110111	negative regulation of animal organ morphogenesis	2/50	35/18670	0.00395275	0.00760989	0.00199235	TNF/STAT1	2
BP	GO:0017015	regulation of transforming growth factor beta receptor signaling pathway	3/50	120/18670	0.00407325	0.00783281	0.00205071	TP53/EP300/TGFB1	3
BP	GO:1903052	positive regulation of proteolysis involved in cellular protein catabolic process	3/50	120/18670	0.00407325	0.00783281	0.00205071	EGF/PTEN/AKT1	3
BP	GO:0009112	nucleobase metabolic process	2/50	36/18670	0.00417813	0.00800667	0.00209623	MAPK1/MTOR	2
BP	GO:0042554	superoxide anion generation	2/50	36/18670	0.00417813	0.00800667	0.00209623	EGFR/TGFB1	2
BP	GO:0045740	positive regulation of DNA replication	2/50	36/18670	0.00417813	0.00800667	0.00209623	JUN/EGFR	2
BP	GO:0060428	lung epithelium development	2/50	36/18670	0.00417813	0.00800667	0.00209623	MAP2K1/CREB1	2
BP	GO:0090218	positive regulation of lipid kinase activity	2/50	36/18670	0.00417813	0.00800667	0.00209623	SRC/TGFB1	2
BP	GO:2000310	regulation of NMDA receptor activity	2/50	36/18670	0.00417813	0.00800667	0.00209623	CCL2/IFNG	2
BP	GO:0019079	viral genome replication	3/50	122/18670	0.00426611	0.00816586	0.00213791	TNF/CXCL8/CCL2	3
BP	GO:1903844	regulation of cellular response to transforming growth factor beta stimulus	3/50	122/18670	0.00426611	0.00816586	0.00213791	TP53/EP300/TGFB1	3
BP	GO:1903362	regulation of cellular protein catabolic process	4/50	247/18670	0.00427399	0.00817623	0.00214063	EGF/PTEN/AKT1/HSP90AA1	4
BP	GO:0042180	cellular ketone metabolic process	4/50	248/18670	0.00433559	0.00828451	0.00216897	PTGS2/MTOR/AKT1/IL1B	4
BP	GO:0043543	protein acylation	4/50	248/18670	0.00433559	0.00828451	0.00216897	MAPK3/IL1B/EP300/TGFB1	4
BP	GO:0006732	coenzyme metabolic process	5/50	403/18670	0.00436313	0.00833235	0.0021815	TP53/STAT3/PTGS2/HIF1A/IFNG	5
BP	GO:0006921	cellular component disassembly involved in execution phase of apoptosis	2/50	37/18670	0.00440935	0.00837726	0.00219326	IL6/CASP3	2
BP	GO:0043243	positive regulation of protein complex disassembly	2/50	37/18670	0.00440935	0.00837726	0.00219326	TNF/IGF1R	2
BP	GO:0045923	positive regulation of fatty acid metabolic process	2/50	37/18670	0.00440935	0.00837726	0.00219326	PTGS2/IL1B	2
BP	GO:0046006	regulation of activated T cell proliferation	2/50	37/18670	0.00440935	0.00837726	0.00219326	CASP3/IL2	2
BP	GO:0050691	regulation of defense response to virus by host	2/50	37/18670	0.00440935	0.00837726	0.00219326	STAT1/IL1B	2
BP	GO:0071542	dopaminergic neuron differentiation	2/50	37/18670	0.00440935	0.00837726	0.00219326	VEGFA/HIF1A	2
BP	GO:0090050	positive regulation of cell migration involved in sprouting angiogenesis	2/50	37/18670	0.00440935	0.00837726	0.00219326	VEGFA/PTGS2	2
BP	GO:1903427	negative regulation of reactive oxygen species biosynthetic process	2/50	37/18670	0.00440935	0.00837726	0.00219326	STAT3/IL10	2
BP	GO:1904358	positive regulation of telomere maintenance via telomere lengthening	2/50	37/18670	0.00440935	0.00837726	0.00219326	MAPK3/MAPK1	2
BP	GO:0001838	embryonic epithelial tube formation	3/50	124/18670	0.00446445	0.00847226	0.00221813	CASP3/HIF1A/TGFB1	3
BP	GO:0019218	regulation of steroid metabolic process	3/50	124/18670	0.00446445	0.00847226	0.00221813	TNF/IL1B/IFNG	3
BP	GO:0021537	telencephalon development	4/50	251/18670	0.00452397	0.00858029	0.00224641	CASP3/EGFR/PTEN/HIF1A	4
BP	GO:0031929	TOR signaling	3/50	125/18670	0.00456569	0.00865448	0.00226584	MTOR/AKT1/HIF1A	3
BP	GO:0010831	positive regulation of myotube differentiation	2/50	38/18670	0.00464639	0.00876244	0.0022941	MTOR/MAPK14	2
BP	GO:0032094	response to food	2/50	38/18670	0.00464639	0.00876244	0.0022941	MTOR/AKT1	2
BP	GO:0046326	positive regulation of glucose import	2/50	38/18670	0.00464639	0.00876244	0.0022941	AKT1/MAPK14	2
BP	GO:0046825	regulation of protein export from nucleus	2/50	38/18670	0.00464639	0.00876244	0.0022941	TP53/IL1B	2
BP	GO:0060045	positive regulation of cardiac muscle cell proliferation	2/50	38/18670	0.00464639	0.00876244	0.0022941	MAPK1/MAPK14	2
BP	GO:0071867	response to monoamine	2/50	38/18670	0.00464639	0.00876244	0.0022941	MAPK3/MAPK1	2
BP	GO:0071869	response to catecholamine	2/50	38/18670	0.00464639	0.00876244	0.0022941	MAPK3/MAPK1	2
BP	GO:1903523	negative regulation of blood circulation	2/50	38/18670	0.00464639	0.00876244	0.0022941	IL2/JAK2	2
BP	GO:2000279	negative regulation of DNA biosynthetic process	2/50	38/18670	0.00464639	0.00876244	0.0022941	TP53/SRC	2
BP	GO:0032479	regulation of type I interferon production	3/50	126/18670	0.00466831	0.00879878	0.00230362	IL10/STAT1/EP300	3
BP	GO:0032606	type I interferon production	3/50	128/18670	0.00487773	0.00917347	0.00240171	IL10/STAT1/EP300	3
BP	GO:0010761	fibroblast migration	2/50	39/18670	0.0048892	0.00917347	0.00240171	AKT1/TGFB1	2
BP	GO:0033574	response to testosterone	2/50	39/18670	0.0048892	0.00917347	0.00240171	SPP1/AR	2
BP	GO:0038179	neurotrophin signaling pathway	2/50	39/18670	0.0048892	0.00917347	0.00240171	CASP3/SRC	2
BP	GO:0045911	positive regulation of DNA recombination	2/50	39/18670	0.0048892	0.00917347	0.00240171	IL2/TGFB1	2
BP	GO:0051930	regulation of sensory perception of pain	2/50	39/18670	0.0048892	0.00917347	0.00240171	MTOR/IL10	2
BP	GO:1905521	regulation of macrophage migration	2/50	39/18670	0.0048892	0.00917347	0.00240171	MAPK3/MAPK14	2
BP	GO:2000648	positive regulation of stem cell proliferation	2/50	39/18670	0.0048892	0.00917347	0.00240171	VEGFA/HIF1A	2
BP	GO:0003206	cardiac chamber morphogenesis	3/50	129/18670	0.00498454	0.00934707	0.00244716	TP53/HIF1A/TGFB1	3
BP	GO:0032412	regulation of ion transmembrane transporter activity	4/50	260/18670	0.00512215	0.0095997	0.00251331	MMP9/PTEN/CCL2/IFNG	4
BP	GO:0002369	T cell cytokine production	2/50	40/18670	0.00513776	0.00960727	0.00251529	IL6/IL1B	2
BP	GO:0042036	negative regulation of cytokine biosynthetic process	2/50	40/18670	0.00513776	0.00960727	0.00251529	IL6/IL10	2
BP	GO:0051931	regulation of sensory perception	2/50	40/18670	0.00513776	0.00960727	0.00251529	MTOR/IL10	2
BP	GO:0071470	cellular response to osmotic stress	2/50	40/18670	0.00513776	0.00960727	0.00251529	PTGS2/CASP3	2
BP	GO:0030183	B cell differentiation	3/50	131/18670	0.00520239	0.00971717	0.00254406	TP53/IL10/EP300	3
BP	GO:0098754	detoxification	3/50	131/18670	0.00520239	0.00971717	0.00254406	TNF/PTGS2/CAT	3
BP	GO:0007281	germ cell development	4/50	262/18670	0.00526195	0.0098229	0.00257174	SRC/BCL2L1/MTOR/AKT1	4
BP	GO:0042476	odontogenesis	3/50	132/18670	0.00531343	0.00990231	0.00259253	SRC/TGFB1/SERPINE1	3
BP	GO:0055007	cardiac muscle cell differentiation	3/50	132/18670	0.00531343	0.00990231	0.00259253	VEGFA/MTOR/TGFB1	3
BP	GO:0072175	epithelial tube formation	3/50	132/18670	0.00531343	0.00990231	0.00259253	CASP3/HIF1A/TGFB1	3
BP	GO:0006308	DNA catabolic process	2/50	41/18670	0.00539204	0.0100095	0.00262059	IL6/CASP3	2
BP	GO:0030890	positive regulation of B cell proliferation	2/50	41/18670	0.00539204	0.0100095	0.00262059	IL2/CDKN1A	2
BP	GO:0050434	positive regulation of viral transcription	2/50	41/18670	0.00539204	0.0100095	0.00262059	JUN/EP300	2
BP	GO:0050798	activated T cell proliferation	2/50	41/18670	0.00539204	0.0100095	0.00262059	CASP3/IL2	2
BP	GO:0090279	regulation of calcium ion import	2/50	41/18670	0.00539204	0.0100095	0.00262059	EGF/CCL2	2
BP	GO:1903053	regulation of extracellular matrix organization	2/50	41/18670	0.00539204	0.0100095	0.00262059	IL6/TGFB1	2
BP	GO:1905209	positive regulation of cardiocyte differentiation	2/50	41/18670	0.00539204	0.0100095	0.00262059	MTOR/TGFB1	2
BP	GO:0071333	cellular response to glucose stimulus	3/50	133/18670	0.0054259	0.0100667	0.00263558	IGF1R/ICAM1/HIF1A	3
BP	GO:0006766	vitamin metabolic process	3/50	134/18670	0.0055398	0.0102666	0.0026879	TNF/IL1B/IFNG	3
BP	GO:0032273	positive regulation of protein polymerization	3/50	134/18670	0.0055398	0.0102666	0.0026879	MTOR/HSP90AA1/ICAM1	3
BP	GO:0044839	cell cycle G2/M phase transition	4/50	266/18670	0.0055492	0.0102782	0.00269096	TP53/CCND1/HSP90AA1/CDKN1A	4
BP	GO:0010677	negative regulation of cellular carbohydrate metabolic process	2/50	42/18670	0.00565201	0.0104453	0.0027347	STAT3/EP300	2
BP	GO:0010907	positive regulation of glucose metabolic process	2/50	42/18670	0.00565201	0.0104453	0.0027347	SRC/AKT1	2
BP	GO:1901031	regulation of response to reactive oxygen species	2/50	42/18670	0.00565201	0.0104453	0.0027347	TNF/IL10	2
BP	GO:1903146	regulation of autophagy of mitochondrion	2/50	42/18670	0.00565201	0.0104453	0.0027347	TP53/HIF1A	2
BP	GO:0071331	cellular response to hexose stimulus	3/50	135/18670	0.00565513	0.0104453	0.0027347	IGF1R/ICAM1/HIF1A	3
BP	GO:0022898	regulation of transmembrane transporter activity	4/50	268/18670	0.00569669	0.0105162	0.00275327	MMP9/PTEN/CCL2/IFNG	4
BP	GO:0071326	cellular response to monosaccharide stimulus	3/50	136/18670	0.0057719	0.0106491	0.00278806	IGF1R/ICAM1/HIF1A	3
BP	GO:1903670	regulation of sprouting angiogenesis	3/50	137/18670	0.0058901	0.0108612	0.00284358	VEGFA/PTGS2/IL10	3
BP	GO:0006692	prostanoid metabolic process	2/50	43/18670	0.00591762	0.0108637	0.00284423	PTGS2/IL1B	2
BP	GO:0006693	prostaglandin metabolic process	2/50	43/18670	0.00591762	0.0108637	0.00284423	PTGS2/IL1B	2
BP	GO:0010863	positive regulation of phospholipase C activity	2/50	43/18670	0.00591762	0.0108637	0.00284423	EGFR/ESR1	2
BP	GO:0033173	calcineurin-NFAT signaling cascade	2/50	43/18670	0.00591762	0.0108637	0.00284423	TNF/MTOR	2
BP	GO:0042088	T-helper 1 type immune response	2/50	43/18670	0.00591762	0.0108637	0.00284423	MTOR/IL1B	2
BP	GO:0045687	positive regulation of glial cell differentiation	2/50	43/18670	0.00591762	0.0108637	0.00284423	MTOR/TGFB1	2
BP	GO:0051602	response to electrical stimulus	2/50	43/18670	0.00591762	0.0108637	0.00284423	SRC/PTEN	2
BP	GO:1904646	cellular response to amyloid-beta	2/50	43/18670	0.00591762	0.0108637	0.00284423	IGF1R/ICAM1	2
BP	GO:1901617	organic hydroxy compound biosynthetic process	4/50	271/18670	0.00592282	0.0108672	0.00284516	TP53/TNF/IL1B/IFNG	4
BP	GO:0006816	calcium ion transport	5/50	434/18670	0.00595159	0.010908	0.00285582	PTGS2/EGF/CCL2/ICAM1/TGFB1	5
BP	GO:0042391	regulation of membrane potential	5/50	434/18670	0.00595159	0.010908	0.00285582	JUN/SRC/BCL2L1/PTEN/AKT1	5
BP	GO:0061448	connective tissue development	4/50	273/18670	0.00607686	0.0111314	0.00291433	MAPK3/MAPK14/HIF1A/TGFB1	4
BP	GO:0002831	regulation of response to biotic stimulus	3/50	139/18670	0.00613087	0.0112242	0.0029386	MAPK3/STAT1/IL1B	3
BP	GO:0010828	positive regulation of glucose transmembrane transport	2/50	44/18670	0.00618887	0.011293	0.00295662	AKT1/MAPK14	2
BP	GO:0014003	oligodendrocyte development	2/50	44/18670	0.00618887	0.011293	0.00295662	PTEN/TGFB1	2
BP	GO:0032965	regulation of collagen biosynthetic process	2/50	44/18670	0.00618887	0.011293	0.00295662	IL6/TGFB1	2
BP	GO:0035850	epithelial cell differentiation involved in kidney development	2/50	44/18670	0.00618887	0.011293	0.00295662	MMP9/STAT1	2
BP	GO:0060999	positive regulation of dendritic spine development	2/50	44/18670	0.00618887	0.011293	0.00295662	MTOR/IL2	2
BP	GO:0061756	leukocyte adhesion to vascular endothelial cell	2/50	44/18670	0.00618887	0.011293	0.00295662	TNF/ICAM1	2
BP	GO:0043270	positive regulation of ion transport	4/50	275/18670	0.00623356	0.0113683	0.00297634	AKT1/CCL2/IL1B/IFNG	4
BP	GO:0019932	second-messenger-mediated signaling	5/50	439/18670	0.00624153	0.0113766	0.00297851	VEGFA/TNF/EGFR/CXCL8/MTOR	5
BP	GO:0050709	negative regulation of protein secretion	3/50	141/18670	0.00637746	0.011618	0.00304171	TNF/IL10/IL1B	3
BP	GO:0031018	endocrine pancreas development	2/50	45/18670	0.0064657	0.0117401	0.00307368	IL6/AKT1	2
BP	GO:0035987	endodermal cell differentiation	2/50	45/18670	0.0064657	0.0117401	0.00307368	MMP9/MMP2	2
BP	GO:0045581	negative regulation of T cell differentiation	2/50	45/18670	0.0064657	0.0117401	0.00307368	IL2/ERBB2	2
BP	GO:0048255	mRNA stabilization	2/50	45/18670	0.0064657	0.0117401	0.00307368	MTOR/MAPK14	2
BP	GO:1900274	regulation of phospholipase C activity	2/50	45/18670	0.0064657	0.0117401	0.00307368	EGFR/ESR1	2
BP	GO:1902743	regulation of lamellipodium organization	2/50	45/18670	0.0064657	0.0117401	0.00307368	SRC/MTOR	2
BP	GO:0007030	Golgi organization	3/50	142/18670	0.00650295	0.0117948	0.00308801	MAPK3/MAPK1/MAP2K1	3
BP	GO:0034332	adherens junction organization	3/50	142/18670	0.00650295	0.0117948	0.00308801	VEGFA/SRC/PTEN	3
BP	GO:0044282	small molecule catabolic process	5/50	445/18670	0.00660248	0.0119688	0.00313356	TP53/MTOR/PTEN/AKT1/TGFB1	5
BP	GO:0106106	cold-induced thermogenesis	3/50	143/18670	0.00662991	0.0120054	0.00314315	VEGFA/JAK2/IGF1R	3
BP	GO:0120161	regulation of cold-induced thermogenesis	3/50	143/18670	0.00662991	0.0120054	0.00314315	VEGFA/JAK2/IGF1R	3
BP	GO:0001754	eye photoreceptor cell differentiation	2/50	46/18670	0.0067481	0.0121664	0.00318528	VEGFA/STAT3	2
BP	GO:0005978	glycogen biosynthetic process	2/50	46/18670	0.0067481	0.0121664	0.00318528	MTOR/AKT1	2
BP	GO:0009250	glucan biosynthetic process	2/50	46/18670	0.0067481	0.0121664	0.00318528	MTOR/AKT1	2
BP	GO:0010883	regulation of lipid storage	2/50	46/18670	0.0067481	0.0121664	0.00318528	IL6/TNF	2
BP	GO:0031648	protein destabilization	2/50	46/18670	0.0067481	0.0121664	0.00318528	SRC/EP300	2
BP	GO:0032369	negative regulation of lipid transport	2/50	46/18670	0.0067481	0.0121664	0.00318528	EGF/AKT1	2
BP	GO:0043330	response to exogenous dsRNA	2/50	46/18670	0.0067481	0.0121664	0.00318528	MAPK3/MAPK1	2
BP	GO:0097720	calcineurin-mediated signaling	2/50	46/18670	0.0067481	0.0121664	0.00318528	TNF/MTOR	2
BP	GO:0071322	cellular response to carbohydrate stimulus	3/50	144/18670	0.00675834	0.0121782	0.00318839	IGF1R/ICAM1/HIF1A	3
BP	GO:0007265	Ras protein signal transduction	5/50	448/18670	0.00678836	0.0122257	0.00320081	TP53/JUN/MAPK14/CDKN1A/JAK2	5
BP	GO:0032409	regulation of transporter activity	4/50	283/18670	0.0068873	0.0123904	0.00324395	MMP9/PTEN/CCL2/IFNG	4
BP	GO:0051258	protein polymerization	4/50	283/18670	0.0068873	0.0123904	0.00324395	MTOR/HSP90AA1/JAK2/ICAM1	4
BP	GO:2000241	regulation of reproductive process	3/50	146/18670	0.00701965	0.0126217	0.0033045	SRC/ESR1/AR	3
BP	GO:0043370	regulation of CD4-positive, alpha-beta T cell differentiation	2/50	47/18670	0.00703602	0.0126238	0.00330504	IL2/IFNG	2
BP	GO:0048806	genitalia development	2/50	47/18670	0.00703602	0.0126238	0.00330504	ESR1/AR	2
BP	GO:1900744	regulation of p38MAPK cascade	2/50	47/18670	0.00703602	0.0126238	0.00330504	VEGFA/IL1B	2
BP	GO:2000107	negative regulation of leukocyte apoptotic process	2/50	47/18670	0.00703602	0.0126238	0.00330504	IL2/HIF1A	2
BP	GO:0060828	regulation of canonical Wnt signaling pathway	4/50	286/18670	0.00714375	0.0128101	0.00335383	EGFR/EGF/SRC/MAPK14	4
BP	GO:0090263	positive regulation of canonical Wnt signaling pathway	3/50	147/18670	0.00715254	0.012819	0.00335615	EGFR/EGF/SRC	3
BP	GO:0002792	negative regulation of peptide secretion	3/50	148/18670	0.00728691	0.0130528	0.00341735	TNF/IL10/IL1B	3
BP	GO:0071824	protein-DNA complex subunit organization	4/50	288/18670	0.00731819	0.0130796	0.00342438	TP53/MYC/ESR1/CREB1	4
BP	GO:0002711	positive regulation of T cell mediated immunity	2/50	48/18670	0.00732945	0.0130796	0.00342438	IL6/IL1B	2
BP	GO:0042059	negative regulation of epidermal growth factor receptor signaling pathway	2/50	48/18670	0.00732945	0.0130796	0.00342438	EGFR/EGF	2
BP	GO:0072604	interleukin-6 secretion	2/50	48/18670	0.00732945	0.0130796	0.00342438	TNF/IL1B	2
BP	GO:0101023	vascular endothelial cell proliferation	2/50	48/18670	0.00732945	0.0130796	0.00342438	STAT3/CCL2	2
BP	GO:1903727	positive regulation of phospholipid metabolic process	2/50	48/18670	0.00732945	0.0130796	0.00342438	SRC/TGFB1	2
BP	GO:1905562	regulation of vascular endothelial cell proliferation	2/50	48/18670	0.00732945	0.0130796	0.00342438	STAT3/CCL2	2
BP	GO:0048592	eye morphogenesis	3/50	149/18670	0.00742278	0.0132248	0.0034624	VEGFA/STAT3/HIF1A	3
BP	GO:0050773	regulation of dendrite development	3/50	149/18670	0.00742278	0.0132248	0.0034624	MTOR/PTEN/IL2	3
BP	GO:2000058	regulation of ubiquitin-dependent protein catabolic process	3/50	149/18670	0.00742278	0.0132248	0.0034624	EGF/PTEN/AKT1	3
BP	GO:0003015	heart process	4/50	290/18670	0.00749543	0.0133471	0.00349441	SRC/MTOR/IL2/JAK2	4
BP	GO:0008360	regulation of cell shape	3/50	150/18670	0.00756015	0.0134551	0.00352269	VEGFA/CCL2/ICAM1	3
BP	GO:0002686	negative regulation of leukocyte migration	2/50	49/18670	0.00762835	0.0135475	0.00354687	AKT1/CCL2	2
BP	GO:0010712	regulation of collagen metabolic process	2/50	49/18670	0.00762835	0.0135475	0.00354687	IL6/TGFB1	2
BP	GO:0048546	digestive tract morphogenesis	2/50	49/18670	0.00762835	0.0135475	0.00354687	EGFR/HIF1A	2
BP	GO:0061912	selective autophagy	2/50	49/18670	0.00762835	0.0135475	0.00354687	MAPK3/TP53	2
BP	GO:0016999	antibiotic metabolic process	3/50	151/18670	0.00769902	0.0136657	0.00357782	STAT3/EGFR/CAT	3
BP	GO:0001678	cellular glucose homeostasis	3/50	152/18670	0.0078394	0.0139	0.00363916	IGF1R/ICAM1/HIF1A	3
BP	GO:0030902	hindbrain development	3/50	152/18670	0.0078394	0.0139	0.00363916	TP53/EGF/MAP2K1	3
BP	GO:0001706	endoderm formation	2/50	50/18670	0.00793269	0.0140205	0.00367071	MMP9/MMP2	2
BP	GO:0002931	response to ischemia	2/50	50/18670	0.00793269	0.0140205	0.00367071	TP53/CASP9	2
BP	GO:0032873	negative regulation of stress-activated MAPK cascade	2/50	50/18670	0.00793269	0.0140205	0.00367071	MYC/AKT1	2
BP	GO:0043489	RNA stabilization	2/50	50/18670	0.00793269	0.0140205	0.00367071	MTOR/MAPK14	2
BP	GO:0070303	negative regulation of stress-activated protein kinase signaling cascade	2/50	50/18670	0.00793269	0.0140205	0.00367071	MYC/AKT1	2
BP	GO:2000725	regulation of cardiac muscle cell differentiation	2/50	50/18670	0.00793269	0.0140205	0.00367071	MTOR/TGFB1	2
BP	GO:1990845	adaptive thermogenesis	3/50	154/18670	0.00812469	0.0143522	0.00375755	VEGFA/JAK2/IGF1R	3
BP	GO:0002758	innate immune response-activating signal transduction	4/50	298/18670	0.00823277	0.0145354	0.00380552	SRC/ESR1/CASP8/EP300	4
BP	GO:0019369	arachidonic acid metabolic process	2/50	51/18670	0.00824244	0.014537	0.00380594	MAPK3/PTGS2	2
BP	GO:0032206	positive regulation of telomere maintenance	2/50	51/18670	0.00824244	0.014537	0.00380594	MAPK3/MAPK1	2
BP	GO:1903707	negative regulation of hemopoiesis	3/50	155/18670	0.00826961	0.0145772	0.00381646	MYC/IL2/ERBB2	3
BP	GO:0002429	immune response-activating cell surface receptor signaling pathway	5/50	473/18670	0.00848315	0.0149456	0.00391293	MAPK3/MAPK1/SRC/HSP90AA1/EP300	5
BP	GO:0010769	regulation of cell morphogenesis involved in differentiation	4/50	301/18670	0.00852115	0.0150046	0.00392837	VEGFA/PTEN/MAP2K1/SPP1	4
BP	GO:0003179	heart valve morphogenesis	2/50	52/18670	0.00855758	0.0150289	0.00393474	MTOR/TGFB1	2
BP	GO:0031529	ruffle organization	2/50	52/18670	0.00855758	0.0150289	0.00393474	MTOR/ICAM1	2
BP	GO:0035176	social behavior	2/50	52/18670	0.00855758	0.0150289	0.00393474	MTOR/PTEN	2
BP	GO:0051703	intraspecies interaction between organisms	2/50	52/18670	0.00855758	0.0150289	0.00393474	MTOR/PTEN	2
BP	GO:1902373	negative regulation of mRNA catabolic process	2/50	52/18670	0.00855758	0.0150289	0.00393474	MTOR/MAPK14	2
BP	GO:0010043	response to zinc ion	2/50	53/18670	0.00887806	0.0155506	0.00407133	PTEN/CREB1	2
BP	GO:0031638	zymogen activation	2/50	53/18670	0.00887806	0.0155506	0.00407133	CASP8/SERPINE1	2
BP	GO:0032715	negative regulation of interleukin-6 production	2/50	53/18670	0.00887806	0.0155506	0.00407133	TNF/IL10	2
BP	GO:0032964	collagen biosynthetic process	2/50	53/18670	0.00887806	0.0155506	0.00407133	IL6/TGFB1	2
BP	GO:0043331	response to dsRNA	2/50	53/18670	0.00887806	0.0155506	0.00407133	MAPK3/MAPK1	2
BP	GO:0043087	regulation of GTPase activity	5/50	479/18670	0.00893005	0.0156335	0.00409301	JUN/MTOR/CCL2/ERBB2/ICAM1	5
BP	GO:0021915	neural tube development	3/50	160/18670	0.00901711	0.0157693	0.00412856	CASP3/HIF1A/TGFB1	3
BP	GO:0032680	regulation of tumor necrosis factor production	3/50	160/18670	0.00901711	0.0157693	0.00412856	IL10/JAK2/IFNG	3
BP	GO:0006636	unsaturated fatty acid biosynthetic process	2/50	54/18670	0.00920386	0.016062	0.00420521	PTGS2/IL1B	2
BP	GO:0043392	negative regulation of DNA binding	2/50	54/18670	0.00920386	0.016062	0.00420521	JUN/JAK2	2
BP	GO:0045747	positive regulation of Notch signaling pathway	2/50	54/18670	0.00920386	0.016062	0.00420521	STAT3/EP300	2
BP	GO:0061005	cell differentiation involved in kidney development	2/50	54/18670	0.00920386	0.016062	0.00420521	MMP9/STAT1	2
BP	GO:0043312	neutrophil degranulation	5/50	485/18670	0.00939307	0.0163836	0.00428941	MAPK1/MMP9/MAPK14/CAT/HSP90AA1	5
BP	GO:0032640	tumor necrosis factor production	3/50	163/18670	0.00948405	0.0165183	0.00432467	IL10/JAK2/IFNG	3
BP	GO:1903555	regulation of tumor necrosis factor superfamily cytokine production	3/50	163/18670	0.00948405	0.0165183	0.00432467	IL10/JAK2/IFNG	3
BP	GO:0002011	morphogenesis of an epithelial sheet	2/50	55/18670	0.00953495	0.0165183	0.00432467	MTOR/PTEN	2
BP	GO:0002090	regulation of receptor internalization	2/50	55/18670	0.00953495	0.0165183	0.00432467	VEGFA/EGF	2
BP	GO:0006383	transcription by RNA polymerase III	2/50	55/18670	0.00953495	0.0165183	0.00432467	MTOR/AR	2
BP	GO:0016233	telomere capping	2/50	55/18670	0.00953495	0.0165183	0.00432467	MAPK3/MAPK1	2
BP	GO:0042304	regulation of fatty acid biosynthetic process	2/50	55/18670	0.00953495	0.0165183	0.00432467	PTGS2/IL1B	2
BP	GO:0043030	regulation of macrophage activation	2/50	55/18670	0.00953495	0.0165183	0.00432467	IL6/IL10	2
BP	GO:0043551	regulation of phosphatidylinositol 3-kinase activity	2/50	55/18670	0.00953495	0.0165183	0.00432467	SRC/TGFB1	2
BP	GO:0045620	negative regulation of lymphocyte differentiation	2/50	55/18670	0.00953495	0.0165183	0.00432467	IL2/ERBB2	2
BP	GO:0046456	icosanoid biosynthetic process	2/50	55/18670	0.00953495	0.0165183	0.00432467	PTGS2/IL1B	2
BP	GO:0048016	inositol phosphate-mediated signaling	2/50	55/18670	0.00953495	0.0165183	0.00432467	TNF/MTOR	2
BP	GO:0061098	positive regulation of protein tyrosine kinase activity	2/50	55/18670	0.00953495	0.0165183	0.00432467	EGF/SRC	2
BP	GO:0002283	neutrophil activation involved in immune response	5/50	488/18670	0.00963072	0.0166755	0.00436583	MAPK1/MMP9/MAPK14/CAT/HSP90AA1	5
BP	GO:0007088	regulation of mitotic nuclear division	3/50	164/18670	0.00964279	0.0166877	0.00436902	EGF/IL1B/TGFB1	3
BP	GO:0031295	T cell costimulation	2/50	56/18670	0.00987131	0.0170654	0.0044679	SRC/AKT1	2
BP	GO:0098586	cellular response to virus	2/50	56/18670	0.00987131	0.0170654	0.0044679	BCL2L1/MAPK14	2
BP	GO:1901568	fatty acid derivative metabolic process	3/50	167/18670	0.0101283	0.0175006	0.00458185	MAPK3/PTGS2/IL1B	3
BP	GO:0002066	columnar/cuboidal epithelial cell development	2/50	57/18670	0.0102129	0.0176284	0.00461531	CDKN1A/HIF1A	2
BP	GO:0031294	lymphocyte costimulation	2/50	57/18670	0.0102129	0.0176284	0.00461531	SRC/AKT1	2
BP	GO:0071706	tumor necrosis factor superfamily cytokine production	3/50	168/18670	0.0102933	0.0177579	0.00464922	IL10/JAK2/IFNG	3
BP	GO:0002218	activation of innate immune response	4/50	319/18670	0.0103914	0.0179086	0.00468867	SRC/ESR1/CASP8/EP300	4
BP	GO:0007204	positive regulation of cytosolic calcium ion concentration	4/50	319/18670	0.0103914	0.0179086	0.00468867	ESR1/IL2/JAK2/TGFB1	4
BP	GO:0043433	negative regulation of DNA-binding transcription factor activity	3/50	170/18670	0.0106279	0.0183067	0.00479289	IL10/CAT/ESR1	3
BP	GO:0003205	cardiac chamber development	3/50	171/18670	0.0107976	0.0185797	0.00486436	TP53/HIF1A/TGFB1	3
BP	GO:0043901	negative regulation of multi-organism process	3/50	171/18670	0.0107976	0.0185797	0.00486436	JUN/TNF/STAT1	3
BP	GO:0010518	positive regulation of phospholipase activity	2/50	59/18670	0.0109117	0.0187371	0.00490558	EGFR/ESR1	2
BP	GO:0032890	regulation of organic acid transport	2/50	59/18670	0.0109117	0.0187371	0.00490558	AKT1/IL1B	2
BP	GO:0045843	negative regulation of striated muscle tissue development	2/50	59/18670	0.0109117	0.0187371	0.00490558	PTEN/TGFB1	2
BP	GO:1902369	negative regulation of RNA catabolic process	2/50	59/18670	0.0109117	0.0187371	0.00490558	MTOR/MAPK14	2
BP	GO:0032874	positive regulation of stress-activated MAPK cascade	3/50	172/18670	0.0109688	0.0188158	0.00492618	VEGFA/TNF/IL1B	3
BP	GO:0051262	protein tetramerization	3/50	172/18670	0.0109688	0.0188158	0.00492618	TP53/CAT/IGF1R	3
BP	GO:0070304	positive regulation of stress-activated protein kinase signaling cascade	3/50	173/18670	0.0111416	0.0191024	0.00500121	VEGFA/TNF/IL1B	3
BP	GO:0048635	negative regulation of muscle organ development	2/50	60/18670	0.0112688	0.0193005	0.00505307	PTEN/TGFB1	2
BP	GO:0090342	regulation of cell aging	2/50	60/18670	0.0112688	0.0193005	0.00505307	TP53/PTEN	2
BP	GO:0046165	alcohol biosynthetic process	3/50	175/18670	0.011492	0.0196726	0.0051505	TNF/IL1B/IFNG	3
BP	GO:0003170	heart valve development	2/50	61/18670	0.011631	0.0198288	0.0051914	MTOR/TGFB1	2
BP	GO:0006879	cellular iron ion homeostasis	2/50	61/18670	0.011631	0.0198288	0.0051914	MYC/HIF1A	2
BP	GO:0010803	regulation of tumor necrosis factor-mediated signaling pathway	2/50	61/18670	0.011631	0.0198288	0.0051914	TNF/CASP8	2
BP	GO:0030521	androgen receptor signaling pathway	2/50	61/18670	0.011631	0.0198288	0.0051914	EP300/AR	2
BP	GO:0032370	positive regulation of lipid transport	2/50	61/18670	0.011631	0.0198288	0.0051914	IL1B/SPP1	2
BP	GO:0090303	positive regulation of wound healing	2/50	61/18670	0.011631	0.0198288	0.0051914	MTOR/SERPINE1	2
BP	GO:2000514	regulation of CD4-positive, alpha-beta T cell activation	2/50	61/18670	0.011631	0.0198288	0.0051914	IL2/IFNG	2
BP	GO:2001244	positive regulation of intrinsic apoptotic signaling pathway	2/50	61/18670	0.011631	0.0198288	0.0051914	TP53/BCL2L1	2
BP	GO:0042742	defense response to bacterium	4/50	330/18670	0.0116561	0.0198615	0.00519994	IL6/TNF/IL10/SERPINE1	4
BP	GO:0043488	regulation of mRNA stability	3/50	177/18670	0.0118486	0.0201688	0.00528041	MTOR/AKT1/MAPK14	3
BP	GO:0060491	regulation of cell projection assembly	3/50	177/18670	0.0118486	0.0201688	0.00528041	SRC/MTOR/ICAM1	3
BP	GO:0010676	positive regulation of cellular carbohydrate metabolic process	2/50	62/18670	0.0119983	0.0203714	0.00533344	SRC/AKT1	2
BP	GO:0010830	regulation of myotube differentiation	2/50	62/18670	0.0119983	0.0203714	0.00533344	MTOR/MAPK14	2
BP	GO:0051898	negative regulation of protein kinase B signaling	2/50	62/18670	0.0119983	0.0203714	0.00533344	PTEN/AKT1	2
BP	GO:0070059	intrinsic apoptotic signaling pathway in response to endoplasmic reticulum stress	2/50	62/18670	0.0119983	0.0203714	0.00533344	TP53/BCL2L1	2
BP	GO:1901862	negative regulation of muscle tissue development	2/50	62/18670	0.0119983	0.0203714	0.00533344	PTEN/TGFB1	2
BP	GO:2001257	regulation of cation channel activity	3/50	178/18670	0.0120294	0.0204137	0.00534452	MMP9/CCL2/IFNG	3
BP	GO:0006611	protein export from nucleus	3/50	179/18670	0.0122117	0.0207019	0.00541997	TP53/IL1B/TGFB1	3
BP	GO:0030177	positive regulation of Wnt signaling pathway	3/50	179/18670	0.0122117	0.0207019	0.00541997	EGFR/EGF/SRC	3
BP	GO:0031646	positive regulation of neurological system process	2/50	63/18670	0.0123707	0.0209287	0.00547936	MTOR/PTEN	2
BP	GO:0046530	photoreceptor cell differentiation	2/50	63/18670	0.0123707	0.0209287	0.00547936	VEGFA/STAT3	2
BP	GO:0046637	regulation of alpha-beta T cell differentiation	2/50	63/18670	0.0123707	0.0209287	0.00547936	IL2/IFNG	2
BP	GO:2000401	regulation of lymphocyte migration	2/50	63/18670	0.0123707	0.0209287	0.00547936	AKT1/CCL2	2
BP	GO:0070613	regulation of protein processing	3/50	180/18670	0.0123956	0.0209601	0.00548759	SRC/IL1B/SERPINE1	3
BP	GO:0051147	regulation of muscle cell differentiation	3/50	181/18670	0.0125811	0.021263	0.00556687	MTOR/MAPK14/TGFB1	3
BP	GO:0043550	regulation of lipid kinase activity	2/50	64/18670	0.0127481	0.0215124	0.00563218	SRC/TGFB1	2
BP	GO:0046782	regulation of viral transcription	2/50	64/18670	0.0127481	0.0215124	0.00563218	JUN/EP300	2
BP	GO:1900449	regulation of glutamate receptor signaling pathway	2/50	64/18670	0.0127481	0.0215124	0.00563218	CCL2/IFNG	2
BP	GO:0030041	actin filament polymerization	3/50	182/18670	0.0127682	0.0215244	0.00563532	MTOR/JAK2/ICAM1	3
BP	GO:1903317	regulation of protein maturation	3/50	182/18670	0.0127682	0.0215244	0.00563532	SRC/IL1B/SERPINE1	3
BP	GO:0043487	regulation of RNA stability	3/50	183/18670	0.0129568	0.0218314	0.00571569	MTOR/AKT1/MAPK14	3
BP	GO:0072678	T cell migration	2/50	65/18670	0.0131305	0.0221127	0.00578936	CCL2/ICAM1	2
BP	GO:0040014	regulation of multicellular organism growth	2/50	66/18670	0.0135179	0.0227421	0.00595412	STAT3/CREB1	2
BP	GO:0046626	regulation of insulin receptor signaling pathway	2/50	66/18670	0.0135179	0.0227421	0.00595412	SRC/IL1B	2
BP	GO:0051705	multi-organism behavior	2/50	67/18670	0.0139102	0.0233902	0.00612382	MTOR/PTEN	2
BP	GO:0051783	regulation of nuclear division	3/50	188/18670	0.0139243	0.0234021	0.00612693	EGF/IL1B/TGFB1	3
BP	GO:0016239	positive regulation of macroautophagy	2/50	68/18670	0.0143074	0.0239974	0.00628279	MAPK3/HIF1A	2
BP	GO:0033627	cell adhesion mediated by integrin	2/50	68/18670	0.0143074	0.0239974	0.00628279	ICAM1/SERPINE1	2
BP	GO:0045806	negative regulation of endocytosis	2/50	68/18670	0.0143074	0.0239974	0.00628279	PTEN/TGFB1	2
BP	GO:0050918	positive chemotaxis	2/50	68/18670	0.0143074	0.0239974	0.00628279	VEGFA/CXCL8	2
BP	GO:0050771	negative regulation of axonogenesis	2/50	69/18670	0.0147095	0.024647	0.00645286	PTEN/SPP1	2
BP	GO:2000243	positive regulation of reproductive process	2/50	69/18670	0.0147095	0.024647	0.00645286	SRC/AR	2
BP	GO:0045333	cellular respiration	3/50	193/18670	0.014932	0.0249945	0.00654384	CAT/HIF1A/IFNG	3
BP	GO:0051224	negative regulation of protein transport	3/50	193/18670	0.014932	0.0249945	0.00654384	TNF/IL10/IL1B	3
BP	GO:0001756	somitogenesis	2/50	70/18670	0.0151165	0.0252271	0.00660474	TP53/EP300	2
BP	GO:0002709	regulation of T cell mediated immunity	2/50	70/18670	0.0151165	0.0252271	0.00660474	IL6/IL1B	2
BP	GO:0010517	regulation of phospholipase activity	2/50	70/18670	0.0151165	0.0252271	0.00660474	EGFR/ESR1	2
BP	GO:0033077	T cell differentiation in thymus	2/50	70/18670	0.0151165	0.0252271	0.00660474	TP53/ERBB2	2
BP	GO:0061515	myeloid cell development	2/50	70/18670	0.0151165	0.0252271	0.00660474	SRC/EP300	2
BP	GO:2001259	positive regulation of cation channel activity	2/50	70/18670	0.0151165	0.0252271	0.00660474	CCL2/IFNG	2
BP	GO:0051168	nuclear export	3/50	194/18670	0.0151384	0.0252509	0.00661097	TP53/IL1B/TGFB1	3
BP	GO:0051480	regulation of cytosolic calcium ion concentration	4/50	357/18670	0.0151704	0.0252916	0.00662163	ESR1/IL2/JAK2/TGFB1	4
BP	GO:0033692	cellular polysaccharide biosynthetic process	2/50	71/18670	0.0155284	0.0258495	0.00676767	MTOR/AKT1	2
BP	GO:0050795	regulation of behavior	2/50	71/18670	0.0155284	0.0258495	0.00676767	STAT3/MTOR	2
BP	GO:0051057	positive regulation of small GTPase mediated signal transduction	2/50	71/18670	0.0155284	0.0258495	0.00676767	SRC/JAK2	2
BP	GO:0006694	steroid biosynthetic process	3/50	196/18670	0.015556	0.0258825	0.00677633	TNF/IL1B/IFNG	3
BP	GO:1904950	negative regulation of establishment of protein localization	3/50	197/18670	0.0157673	0.0262209	0.00686491	TNF/IL10/IL1B	3
BP	GO:0002532	production of molecular mediator involved in inflammatory response	2/50	72/18670	0.015945	0.026437	0.00692149	MAPK14/SERPINE1	2
BP	GO:0006305	DNA alkylation	2/50	72/18670	0.015945	0.026437	0.00692149	MYC/FOS	2
[truncated: 441 more rows]
