# Supplementary material for: Network Pharmacology Identifies the Mechanisms of Action of Tongxie Anchang Decoction in the Treatment of Irritable Bowel Syndrome with Diarrhea Predominant
Source: Evid Based Complement Alternat Med. 2020 Nov 17;2020:2723705. doi: 10.1155/2020/2723705 (PMC7685835; doi:10.1155/2020/2723705)
Supplement: Supplementary Materials — 1: the active compounds of TXACD. Supplementary materials 2: the information on potential targets of TXACD. Supplementary materials 3: the information on potential targets of IBS-D. Supplementary materials 4: raw data of GO enrichment analysis. Supplementary materials 5: raw data of KEGG enrichment analysis. [file 2723705.f1.zip › supplementary material 5.xlsx]

## Sheet: Gene ID
symbol	entrezID
VEGFA	7422
MAPK3	5595
IL6	3569
TP53	7157
JUN	3725
STAT3	6774
TNF	7124
PTGS2	5743
MAPK1	5594
CASP3	836
MAPK8	5599
MMP9	4318
MYC	4609
EGFR	1956
EGF	1950
SRC	6714
BCL2L1	598
CXCL8	3576
MTOR	2475
CCND1	595
PTEN	5728
MAP2K1	5604
AKT1	207
IL10	3586
MMP2	4313
MAPK14	1432
CAT	847
CASP9	842
FOS	2353
ESR1	2099
CREB1	1385
CASP8	841
IL2	3558
HSP90AA1	3320
CCL2	6347
ERBB2	2064
STAT1	6772
CDKN1A	1026
JAK2	3717
IL1B	3553
IGF1R	3480
ICAM1	3383
EP300	2033
HIF1A	3091
TGFB1	7040
MMP1	4312
SERPINE1	5054
SPP1	6696
IFNG	3458
AR	367

## Sheet: KEGG enrichment analysis
ID	Description	GeneRatio	BgRatio	pvalue	p.adjust	qvalue	geneID	Count
hsa05167	Kaposi sarcoma-associated herpesvirus infection	28/50	186/8031	1.16881e-33	2.361e-31	4.92131e-32	7422/5595/3569/7157/3725/6774/5743/5594/836/5599/4609/6714/3576/2475/595/5604/207/1432/842/2353/1385/841/6772/1026/3717/3383/2033/3091	28
hsa05161	Hepatitis B	25/50	162/8031	5.10682e-30	5.15789e-28	1.07512e-28	5595/3569/7157/3725/6774/7124/5594/836/5599/4318/4609/6714/3576/5604/207/1432/842/2353/1385/841/6772/1026/3717/2033/7040	25
hsa04933	AGE-RAGE signaling pathway in diabetic complications	21/50	100/8031	5.476e-28	3.68717e-26	7.68561e-27	7422/5595/3569/3725/6774/7124/5594/836/5599/3576/595/207/4313/1432/6347/6772/3717/3553/3383/7040/5054	21
hsa05219	Bladder cancer	16/50	41/8031	3.2566e-26	1.64458e-24	3.428e-25	7422/5595/7157/5594/4318/4609/1956/1950/6714/3576/595/5604/4313/2064/1026/4312	16
hsa05212	Pancreatic cancer	18/50	76/8031	6.1301e-25	2.47656e-23	5.16219e-24	7422/5595/7157/6774/5594/5599/1956/1950/598/2475/595/5604/207/842/2064/6772/1026/7040	18
hsa05163	Human cytomegalovirus infection	24/50	225/8031	1.02225e-24	3.44157e-23	7.17368e-24	7422/5595/3569/7157/6774/7124/5743/5594/836/4609/1956/6714/3576/2475/595/5604/207/1432/842/1385/841/6347/1026/3553	24
hsa05215	Prostate cancer	19/50	97/8031	1.27481e-24	3.67875e-23	7.66806e-24	5595/7157/5594/4318/1956/1950/2475/595/5728/5604/207/842/1385/3320/2064/1026/3480/2033/367	19
hsa01522	Endocrine resistance	19/50	98/8031	1.57555e-24	3.97827e-23	8.29238e-24	5595/7157/3725/5594/5599/4318/1956/6714/2475/595/5604/207/4313/1432/2353/2099/2064/1026/3480	19
hsa05205	Proteoglycans in cancer	23/50	204/8031	3.48697e-24	7.8263e-23	1.63133e-23	7422/5595/7157/6774/7124/5594/836/4318/4609/1956/6714/2475/595/5604/207/4313/1432/2099/2064/1026/3480/3091/7040	23
hsa04657	IL-17 signaling pathway	18/50	94/8031	4.11452e-23	8.31132e-22	1.73243e-22	5595/3569/3725/7124/5743/5594/836/5599/4318/3576/1432/2353/841/3320/6347/3553/4312/3458	18
hsa05142	Chagas disease (American trypanosomiasis)	18/50	102/8031	2.00736e-22	3.68625e-21	7.68369e-22	5595/3569/3725/7124/5594/5599/3576/207/3586/1432/2353/841/3558/6347/3553/7040/5054/3458	18
hsa05210	Colorectal cancer	17/50	86/8031	4.50195e-22	7.57828e-21	1.57963e-21	5595/7157/3725/5594/836/5599/4609/1956/1950/2475/595/5604/207/842/2353/1026/7040	17
hsa04668	TNF signaling pathway	18/50	112/8031	1.20934e-21	1.87912e-20	3.91688e-21	5595/3569/3725/7124/5743/5594/836/5599/4318/5604/207/1432/2353/1385/841/6347/3553/3383	18
hsa01521	EGFR tyrosine kinase inhibitor resistance	16/50	79/8031	5.84872e-21	8.43887e-20	1.75901e-20	7422/5595/3569/6774/5594/1956/1950/6714/598/2475/5728/5604/207/2064/3717/3480	16
hsa04068	FoxO signaling pathway	18/50	131/8031	2.35105e-20	3.05168e-19	6.36097e-20	5595/3569/6774/5594/5599/1956/1950/595/5728/5604/207/3586/1432/847/1026/3480/2033/7040	18
hsa04659	Th17 cell differentiation	17/50	107/8031	2.41717e-20	3.05168e-19	6.36097e-20	5595/3569/3725/6774/5594/5599/2475/1432/2353/3558/3320/6772/3717/3553/3091/7040/3458	17
hsa04066	HIF-1 signaling pathway	17/50	109/8031	3.37218e-20	4.00694e-19	8.35215e-20	7422/5595/3569/6774/5594/1956/1950/2475/5604/207/2064/1026/3480/2033/3091/5054/3458	17
hsa05235	PD-L1 expression and PD-1 checkpoint pathway in cancer	16/50	89/8031	4.59767e-20	5.15961e-19	1.07548e-19	5595/3725/6774/5594/1956/1950/2475/5728/5604/207/1432/2353/6772/3717/3091/3458	16
hsa05152	Tuberculosis	19/50	180/8031	2.91414e-19	3.09819e-18	6.45792e-19	5595/3569/7124/5594/836/5599/6714/207/3586/1432/842/1385/841/6772/3717/3553/2033/7040/3458	19
hsa05166	Human T-cell leukemia virus 1 infection	20/50	219/8031	4.96983e-19	5.01953e-18	1.04628e-18	5595/3569/7157/3725/7124/5594/5599/4609/598/595/5728/5604/207/2353/1385/3558/1026/3383/2033/7040	20
hsa04151	PI3K-Akt signaling pathway	23/50	354/8031	1.18377e-18	1.13867e-17	2.37347e-18	7422/5595/3569/7157/5594/4609/1956/1950/598/2475/595/5728/5604/207/842/1385/3558/3320/2064/1026/3717/3480/6696	23
hsa05145	Toxoplasmosis	16/50	112/8031	2.25912e-18	2.07429e-17	4.32368e-18	5595/6774/7124/5594/836/5599/598/207/3586/1432/842/841/6772/3717/7040/3458	16
hsa05224	Breast cancer	17/50	147/8031	6.6795e-18	5.86634e-17	1.22279e-17	5595/7157/3725/5594/4609/1956/1950/2475/595/5728/5604/207/2353/2099/2064/1026/3480	17
hsa05135	Yersinia infection	16/50	120/8031	7.1352e-18	6.00546e-17	1.25179e-17	5595/3569/3725/7124/5594/5599/6714/3576/5604/207/3586/1432/2353/3558/6347/3553	16
hsa05213	Endometrial cancer	13/50	58/8031	1.00354e-17	8.10861e-17	1.69017e-17	5595/7157/5594/4609/1956/1950/595/5728/5604/207/842/2064/1026	13
hsa05160	Hepatitis C	17/50	155/8031	1.67742e-17	1.30322e-16	2.71647e-17	5595/7157/6774/7124/5594/836/4609/1956/1950/595/5604/207/842/841/6772/1026/3458	17
hsa04926	Relaxin signaling pathway	16/50	129/8031	2.3616e-17	1.76683e-16	3.68281e-17	7422/5595/3725/5594/5599/4318/1956/6714/5604/207/4313/1432/2353/1385/7040/4312	16
hsa04620	Toll-like receptor signaling pathway	15/50	104/8031	2.64441e-17	1.84197e-16	3.83944e-17	5595/3569/3725/7124/5594/5599/3576/5604/207/1432/2353/841/6772/3553/6696	15
hsa04625	C-type lectin receptor signaling pathway	15/50	104/8031	2.64441e-17	1.84197e-16	3.83944e-17	5595/3569/3725/7124/5743/5594/5599/6714/207/3586/1432/841/3558/6772/3553	15
hsa05418	Fluid shear stress and atherosclerosis	16/50	139/8031	8.05275e-17	5.38192e-16	1.12182e-16	7422/7157/3725/7124/5599/4318/6714/207/4313/1432/2353/3320/6347/3553/3383/3458	16
hsa05164	Influenza A	17/50	170/8031	8.25938e-17	5.38192e-16	1.12182e-16	5595/3569/7124/5594/836/3576/5604/207/842/841/6347/6772/3717/3553/3383/2033/3458	17
hsa04917	Prolactin signaling pathway	13/50	70/8031	1.43334e-16	9.04799e-16	1.88598e-16	5595/6774/5594/5599/6714/595/5604/207/1432/2353/2099/6772/3717	13
hsa05140	Leishmaniasis	13/50	77/8031	5.38344e-16	3.29532e-15	6.86882e-16	5595/3725/7124/5743/5594/3586/1432/2353/6772/3717/3553/7040/3458	13
hsa04630	JAK-STAT signaling pathway	16/50	162/8031	9.69716e-16	5.76125e-15	1.20089e-15	3569/6774/4609/1956/1950/598/2475/595/207/3586/3558/6772/1026/3717/2033/3458	16
hsa05165	Human papillomavirus infection	20/50	330/8031	1.63639e-15	9.44433e-15	1.96859e-15	7422/5595/7157/7124/5743/5594/836/1956/1950/2475/595/5728/5604/207/1385/841/6772/1026/2033/6696	20
hsa04012	ErbB signaling pathway	13/50	85/8031	2.09099e-15	1.14467e-14	2.38598e-15	5595/3725/5594/5599/4609/1956/1950/6714/2475/5604/207/2064/1026	13
hsa05162	Measles	15/50	138/8031	2.09668e-15	1.14467e-14	2.38598e-15	3569/7157/3725/6774/836/5599/598/595/207/842/2353/841/3558/6772/3553	15
hsa04010	MAPK signaling pathway	19/50	294/8031	3.13033e-15	1.63811e-14	3.4145e-15	7422/5595/7157/3725/7124/5594/836/5599/4609/1956/1950/5604/207/1432/2353/2064/3553/3480/7040	19
hsa05223	Non-small cell lung cancer	12/50	66/8031	3.16268e-15	1.63811e-14	3.4145e-15	5595/7157/6774/5594/1956/1950/595/5604/207/842/2064/1026	12
hsa04919	Thyroid hormone signaling pathway	14/50	119/8031	6.76094e-15	3.41428e-14	7.11678e-15	5595/7157/5594/4609/6714/2475/595/5604/207/842/2099/6772/2033/3091	14
hsa05214	Glioma	12/50	75/8031	1.61306e-14	7.94726e-14	1.65654e-14	5595/7157/5594/1956/1950/2475/595/5728/5604/207/1026/3480	12
hsa05133	Pertussis	12/50	76/8031	1.90708e-14	8.99059e-14	1.87402e-14	5595/3569/3725/7124/5594/836/5599/3576/3586/1432/2353/3553	12
hsa04380	Osteoclast differentiation	14/50	128/8031	1.91384e-14	8.99059e-14	1.87402e-14	5595/3725/7124/5594/5599/5604/207/1432/2353/1385/6772/3553/7040/3458	14
hsa04218	Cellular senescence	15/50	160/8031	1.96814e-14	9.03555e-14	1.88339e-14	5595/3569/7157/5594/4609/3576/2475/595/5728/5604/207/1432/1026/7040/5054	15
hsa05169	Epstein-Barr virus infection	16/50	201/8031	3.03999e-14	1.36462e-13	2.84444e-14	3569/7157/3725/6774/7124/836/5599/4609/595/207/1432/842/841/6772/1026/3383	16
hsa05132	Salmonella infection	16/50	214/8031	8.16391e-14	3.58502e-13	7.47269e-14	5595/3569/3725/7124/5594/836/5599/4609/3576/5604/207/1432/2353/841/3320/3553	16
hsa04935	Growth hormone synthesis, secretion and action	13/50	119/8031	1.90778e-13	8.19939e-13	1.7091e-13	5595/6774/5594/5599/2475/5604/207/1432/2353/1385/6772/3717/2033	13
hsa05230	Central carbon metabolism in cancer	11/50	69/8031	2.35601e-13	9.79437e-13	2.04156e-13	5595/7157/5594/4609/1956/2475/5728/5604/207/2064/3091	11
hsa05323	Rheumatoid arthritis	12/50	93/8031	2.37586e-13	9.79437e-13	2.04156e-13	7422/3569/3725/7124/3576/2353/6347/3553/3383/7040/4312/3458	12
hsa05218	Melanoma	11/50	72/8031	3.85197e-13	1.5562e-12	3.24377e-13	5595/7157/5594/1956/1950/595/5728/5604/207/1026/3480	11
hsa04510	Focal adhesion	15/50	199/8031	5.05258e-13	2.00122e-12	4.17138e-13	7422/5595/3725/5594/5599/1956/1950/6714/595/5728/5604/207/2064/3480/6696	15
hsa05225	Hepatocellular carcinoma	14/50	168/8031	8.70535e-13	3.38169e-12	7.04887e-13	5595/7157/5594/4609/1956/598/2475/595/5728/5604/207/1026/3480/7040	14
hsa04660	T cell receptor signaling pathway	12/50	104/8031	9.39102e-13	3.57922e-12	7.46059e-13	5595/3725/7124/5594/5599/5604/207/3586/1432/2353/3558/3458	12
hsa04210	Apoptosis	13/50	136/8031	1.0977e-12	4.10621e-12	8.55907e-13	5595/7157/3725/7124/5594/836/5599/598/5604/207/842/2353/841	13
hsa04915	Estrogen signaling pathway	13/50	138/8031	1.32733e-12	4.87492e-12	1.01614e-12	5595/3725/5594/4318/1956/6714/5604/207/4313/2353/2099/1385/3320	13
hsa05206	MicroRNAs in cancer	17/50	310/8031	1.88409e-12	6.7962e-12	1.41661e-12	7422/5595/7157/6774/5743/5594/836/4318/4609/1956/2475/595/5728/5604/2064/1026/2033	17
hsa04621	NOD-like receptor signaling pathway	14/50	181/8031	2.43608e-12	8.63314e-12	1.79951e-12	5595/3569/3725/7124/5594/5599/598/3576/1432/841/3320/6347/6772/3553	14
hsa05226	Gastric cancer	13/50	149/8031	3.58472e-12	1.24847e-11	2.60234e-12	5595/7157/5594/4609/1956/1950/2475/595/5604/207/2064/1026/7040	13
hsa05321	Inflammatory bowel disease (IBD)	10/50	65/8031	4.68054e-12	1.60249e-11	3.34026e-12	3569/3725/6774/7124/3586/3558/6772/3553/7040/3458	10
hsa05211	Renal cell carcinoma	10/50	69/8031	8.72976e-12	2.93902e-11	6.12615e-12	7422/5595/3725/5594/5604/207/1026/2033/3091/7040	10
hsa05231	Choline metabolism in cancer	11/50	98/8031	1.27053e-11	4.20732e-11	8.76982e-12	5595/3725/5594/5599/1956/1950/2475/5604/207/2353/3091	11
hsa05144	Malaria	9/50	50/8031	1.36253e-11	4.43922e-11	9.25319e-12	3569/7124/3576/3586/6347/3553/3383/7040/3458	9
hsa01524	Platinum drug resistance	10/50	73/8031	1.56629e-11	5.02206e-11	1.04681e-11	5595/7157/5594/836/598/207/842/841/2064/1026	10
hsa05170	Human immunodeficiency virus 1 infection	14/50	212/8031	2.10772e-11	6.6525e-11	1.38666e-11	5595/3725/7124/5594/836/5599/598/2475/5604/207/1432/842/2353/841	14
hsa05220	Chronic myeloid leukemia	10/50	76/8031	2.37351e-11	7.37615e-11	1.5375e-11	5595/7157/5594/4609/598/595/5604/207/1026/7040	10
hsa04370	VEGF signaling pathway	9/50	59/8031	6.55504e-11	2.00624e-10	4.18184e-11	7422/5595/5743/5594/6714/5604/207/1432/842	9
hsa05131	Shigellosis	14/50	236/8031	8.93213e-11	2.69297e-10	5.61328e-11	5595/7157/3725/7124/5594/5599/1956/6714/598/3576/2475/207/1432/3553	14
hsa04658	Th1 and Th2 cell differentiation	10/50	92/8031	1.66659e-10	4.87901e-10	1.01699e-10	5595/3725/5594/5599/1432/2353/3558/6772/3717/3458	10
hsa05222	Small cell lung cancer	10/50	92/8031	1.66659e-10	4.87901e-10	1.01699e-10	7157/5743/836/4609/598/595/5728/207/842/1026	10
hsa05130	Pathogenic Escherichia coli infection	13/50	202/8031	1.71776e-10	4.95698e-10	1.03324e-10	5595/3569/3725/7124/5594/836/5599/3576/1432/842/2353/841/3553	13
hsa04115	p53 signaling pathway	9/50	72/8031	4.1808e-10	1.18947e-09	2.47935e-10	7157/836/598/595/5728/842/841/1026/5054	9
hsa05216	Thyroid cancer	7/50	37/8031	2.09438e-09	5.87589e-09	1.22478e-09	5595/7157/5594/4609/595/5604/1026	7
hsa05203	Viral carcinogenesis	12/50	204/8031	2.71784e-09	7.52061e-09	1.56761e-09	5595/7157/3725/6774/5594/836/6714/595/1385/841/1026/2033	12
hsa04912	GnRH signaling pathway	9/50	93/8031	4.28663e-09	1.17013e-08	2.43905e-09	5595/3725/5594/5599/1956/6714/5604/4313/1432	9
hsa05221	Acute myeloid leukemia	8/50	67/8031	6.21534e-09	1.674e-08	3.48932e-09	5595/6774/5594/4609/2475/595/5604/207	8
hsa04140	Autophagy - animal	10/50	137/8031	8.62447e-09	2.29229e-08	4.7781e-09	5595/5594/5599/598/2475/5728/5604/207/3480/3091	10
hsa04932	Non-alcoholic fatty liver disease (NAFLD)	10/50	149/8031	1.94312e-08	5.09753e-08	1.06254e-08	3569/3725/7124/836/5599/3576/207/841/3553/7040	10
hsa04921	Oxytocin signaling pathway	10/50	154/8031	2.66881e-08	6.91154e-08	1.44066e-08	5595/3725/5743/5594/1956/6714/595/5604/2353/1026	10
hsa04071	Sphingolipid signaling pathway	9/50	119/8031	3.82086e-08	9.76978e-08	2.03643e-08	5595/7157/7124/5594/5599/5728/5604/207/1432	9
hsa05014	Amyotrophic lateral sclerosis (ALS)	7/50	57/8031	4.89516e-08	1.22077e-07	2.54459e-08	7157/7124/836/598/1432/847/842	7
hsa05134	Legionellosis	7/50	57/8031	4.89516e-08	1.22077e-07	2.54459e-08	3569/7124/836/3576/842/841/3553	7
hsa05010	Alzheimer disease	13/50	334/8031	7.77254e-08	1.9147e-07	3.99104e-08	5595/3569/7124/5743/5594/836/5599/2475/5604/207/842/841/3553	13
hsa05143	African trypanosomiasis	6/50	37/8031	8.58267e-08	2.08879e-07	4.35392e-08	3569/7124/3586/3553/3383/3458	6
hsa04914	Progesterone-mediated oocyte maturation	8/50	99/8031	1.40442e-07	3.37729e-07	7.0397e-08	5595/5594/5599/5604/207/1432/3320/3480	8
hsa05168	Herpes simplex virus 1 infection	15/50	491/8031	1.54971e-07	3.68284e-07	7.67659e-08	3569/7157/7124/836/6714/598/2475/207/842/841/6347/6772/3717/3553/3458	15
hsa04664	Fc epsilon RI signaling pathway	7/50	68/8031	1.70434e-07	4.00322e-07	8.34439e-08	5595/7124/5594/5599/5604/207/1432	7
hsa04550	Signaling pathways regulating pluripotency of stem cells	9/50	142/8031	1.77289e-07	4.07177e-07	8.48727e-08	5595/6774/5594/4609/5604/207/1432/3717/3480	9
hsa05146	Amoebiasis	8/50	102/8031	1.77384e-07	4.07177e-07	8.48727e-08	3569/7124/836/3576/3586/3553/7040/3458	8
hsa04062	Chemokine signaling pathway	10/50	189/8031	1.86316e-07	4.22874e-07	8.81446e-08	5595/6774/5594/6714/3576/5604/207/6347/6772/3717	10
hsa05120	Epithelial cell signaling in Helicobacter pylori infection	7/50	70/8031	2.08776e-07	4.68586e-07	9.7673e-08	3725/836/5599/1956/6714/3576/1432	7
hsa04520	Adherens junction	7/50	71/8031	2.30523e-07	5.11709e-07	1.06662e-07	5595/5594/1956/6714/2064/3480/2033	7
hsa04931	Insulin resistance	8/50	108/8031	2.76851e-07	6.07868e-07	1.26705e-07	3569/6774/7124/5599/2475/5728/207/1385	8
hsa04217	Necroptosis	9/50	159/8031	4.66176e-07	1.01255e-06	2.11059e-07	6774/7124/5599/841/3320/6772/3717/3553/3458	9
hsa04015	Rap1 signaling pathway	10/50	210/8031	4.97147e-07	1.06834e-06	2.22686e-07	7422/5595/5594/1956/1950/6714/5604/207/1432/3480	10
hsa04722	Neurotrophin signaling pathway	8/50	119/8031	5.85764e-07	1.24552e-06	2.59618e-07	5595/7157/3725/5594/5599/5604/207/1432	8
hsa04014	Ras signaling pathway	10/50	232/8031	1.24214e-06	2.61367e-06	5.44798e-07	7422/5595/5594/5599/1956/1950/598/5604/207/3480	10
hsa04215	Apoptosis - multiple species	5/50	32/8031	1.35229e-06	2.8161e-06	5.86993e-07	836/5599/598/842/841	5
hsa04350	TGF-beta signaling pathway	7/50	94/8031	1.59206e-06	3.28158e-06	6.84019e-07	5595/7124/5594/4609/2033/7040/3458	7
hsa04371	Apelin signaling pathway	8/50	137/8031	1.71557e-06	3.50046e-06	7.29642e-07	5595/5594/2475/595/5604/207/5054/6696	8
hsa05020	Prion diseases	5/50	35/8031	2.14959e-06	4.34217e-06	9.0509e-07	5595/3569/5594/5604/3553	5
hsa04137	Mitophagy - animal	6/50	65/8031	2.67246e-06	5.34491e-06	1.1141e-06	7157/3725/5599/6714/598/3091	6
hsa04072	Phospholipase D signaling pathway	8/50	148/8031	3.07005e-06	6.0799e-06	1.26731e-06	5595/5594/1956/1950/3576/2475/5604/207	8
hsa04928	Parathyroid hormone synthesis, secretion and action	7/50	106/8031	3.58198e-06	7.02485e-06	1.46427e-06	5595/5594/1956/5604/2353/1385/1026	7
hsa04920	Adipocytokine signaling pathway	6/50	69/8031	3.80616e-06	7.39274e-06	1.54096e-06	6774/7124/5599/2475/207/3717	6
hsa04150	mTOR signaling pathway	8/50	155/8031	4.33774e-06	8.34498e-06	1.73944e-06	5595/7124/5594/2475/5728/5604/207/3480	8
hsa05332	Graft-versus-host disease	5/50	41/8031	4.82486e-06	9.19455e-06	1.91653e-06	3569/7124/3558/3553/3458	5
hsa04725	Cholinergic synapse	7/50	113/8031	5.49221e-06	1.03685e-05	2.16122e-06	5595/5594/5604/207/2353/1385/3717	7
hsa04024	cAMP signaling pathway	9/50	216/8031	5.98998e-06	1.12035e-05	2.33527e-06	5595/3725/5594/5599/5604/207/2353/1385/2033	9
hsa04930	Type II diabetes mellitus	5/50	46/8031	8.62133e-06	1.59772e-05	3.33031e-06	5595/7124/5594/5599/2475	5
hsa04662	B cell receptor signaling pathway	6/50	82/8031	1.04571e-05	1.9203e-05	4.00272e-06	5595/3725/5594/5604/207/2353	6
hsa04650	Natural killer cell mediated cytotoxicity	7/50	131/8031	1.4579e-05	2.65311e-05	5.53019e-06	5595/7124/5594/836/5604/3383/3458	7
hsa04540	Gap junction	6/50	88/8031	1.57328e-05	2.83752e-05	5.91459e-06	5595/5594/1956/1950/6714/5604	6
hsa05202	Transcriptional misregulation in cancer	8/50	186/8031	1.66301e-05	2.97282e-05	6.19661e-06	3569/7157/4318/4609/598/3576/1026/3480	8
hsa04211	Longevity regulating pathway	6/50	89/8031	1.67908e-05	2.97521e-05	6.20159e-06	7157/2475/207/847/1385/3480	6
hsa05416	Viral myocarditis	5/50	60/8031	3.21733e-05	5.65131e-05	1.17797e-05	836/595/842/841/3383	5
hsa04061	Viral protein interaction with cytokine and cytokine receptor	6/50	100/8031	3.27037e-05	5.69495e-05	1.18707e-05	3569/7124/3576/3586/3558/6347	6
hsa04064	NF-kappa B signaling pathway	6/50	104/8031	4.08516e-05	7.05301e-05	1.47014e-05	7124/5743/598/3576/3553/3383	6
hsa04934	Cushing syndrome	7/50	155/8031	4.33591e-05	7.42249e-05	1.54716e-05	5595/5594/1956/595/5604/1385/1026	7
hsa04929	GnRH secretion	5/50	64/8031	4.40833e-05	7.48305e-05	1.55978e-05	5595/5594/5604/207/6696	5
hsa04622	RIG-I-like receptor signaling pathway	5/50	70/8031	6.8042e-05	0.000114537	2.38744e-05	7124/5599/3576/1432/841	5
hsa04060	Cytokine-cytokine receptor interaction	9/50	294/8031	6.97555e-05	0.000116451	2.42733e-05	3569/7124/3576/3586/3558/6347/3553/7040/3458	9
hsa05330	Allograft rejection	4/50	38/8031	8.39745e-05	0.00013904	2.89817e-05	7124/3586/3558/3458	4
hsa04110	Cell cycle	6/50	124/8031	0.000109408	0.000179678	3.74524e-05	7157/4609/595/1026/2033/7040	6
hsa04114	Oocyte meiosis	6/50	128/8031	0.000130402	0.000212428	4.4279e-05	5595/5594/5604/1432/3480/367	6
hsa04940	Type I diabetes mellitus	4/50	43/8031	0.000137217	0.000221743	4.62205e-05	7124/3558/3553/3458	4
hsa04910	Insulin signaling pathway	6/50	139/8031	0.000204995	0.000328642	6.85028e-05	5595/5594/5599/2475/5604/207	6
hsa04672	Intestinal immune network for IgA production	4/50	49/8031	0.000229199	0.000364553	7.59881e-05	3569/3586/3558/7040	4
hsa05016	Huntington disease	8/50	271/8031	0.000237451	0.000374728	7.81089e-05	7157/836/5599/2475/842/1385/841/2033	8
hsa04916	Melanogenesis	5/50	101/8031	0.000385284	0.000603314	0.000125756	5595/5594/5604/1385/2033	5
hsa04310	Wnt signaling pathway	6/50	160/8031	0.000438237	0.000680953	0.000141939	7157/3725/5599/4609/595/2033	6
hsa04730	Long-term depression	4/50	60/8031	0.000501624	0.000773497	0.000161229	5595/5594/5604/3480	4
hsa04213	Longevity regulating pathway - multiple species	4/50	62/8031	0.000568627	0.000870172	0.00018138	2475/207/847/3480	4
hsa04726	Serotonergic synapse	5/50	115/8031	0.00069933	0.00106214	0.000221395	5595/5743/5594/836/5604	5
hsa04720	Long-term potentiation	4/50	67/8031	0.000763651	0.00115117	0.000239953	5595/5594/5604/2033	4
hsa04152	AMPK signaling pathway	5/50	120/8031	0.000848375	0.00126942	0.0002646	2475/595/207/1385/3480	5
hsa01523	Antifolate resistance	3/50	31/8031	0.000902863	0.00134102	0.000279524	3569/7124/3553	3
hsa04611	Platelet activation	5/50	124/8031	0.000983757	0.0014505	0.000302346	5595/5594/6714/207/1432	5
hsa04728	Dopaminergic synapse	5/50	132/8031	0.00130205	0.00190591	0.000397271	5599/207/1432/2353/1385	5
hsa04612	Antigen processing and presentation	4/50	78/8031	0.00135157	0.00196414	0.00040941	7124/1385/3320/3458	4
hsa04810	Regulation of actin cytoskeleton	6/50	213/8031	0.00194626	0.00280818	0.000585342	5595/5594/1956/1950/6714/5604	6
hsa04723	Retrograde endocannabinoid signaling	5/50	148/8031	0.00215942	0.00309363	0.000644843	5595/5743/5594/5599/1432	5
hsa04261	Adrenergic signaling in cardiomyocytes	5/50	149/8031	0.00222402	0.00316374	0.000659457	5595/5594/207/1432/1385	5
hsa04666	Fc gamma R-mediated phagocytosis	4/50	93/8031	0.00258368	0.00364967	0.000760745	5595/5594/5604/207	4
hsa04713	Circadian entrainment	4/50	97/8031	0.00301071	0.00422336	0.000880325	5595/5594/2353/1385	4
hsa04750	Inflammatory mediator regulation of TRP channels	4/50	100/8031	0.00336107	0.00468232	0.000975992	5599/6714/1432/3553	4
hsa04022	cGMP-PKG signaling pathway	5/50	167/8031	0.00364432	0.00504214	0.00105099	5595/5594/5604/207/1385	5
hsa04530	Tight junction	5/50	169/8031	0.00383479	0.00526957	0.0010984	3725/5599/6714/595/2064	5
hsa04670	Leukocyte transendothelial migration	4/50	113/8031	0.00520218	0.00710027	0.00147999	4318/4313/1432/3383	4
hsa05031	Amphetamine addiction	3/50	69/8031	0.0089175	0.0120895	0.00251996	3725/2353/1385	3
hsa05310	Asthma	2/50	31/8031	0.0157445	0.0212026	0.0044195	7124/3586	2
hsa04390	Hippo signaling pathway	4/50	157/8031	0.0161239	0.0215697	0.00449602	4609/595/7040/5054	4
hsa05410	Hypertrophic cardiomyopathy (HCM)	3/50	90/8031	0.0182572	0.0242629	0.0050574	3569/7124/7040	3
hsa04960	Aldosterone-regulated sodium reabsorption	2/50	37/8031	0.0220232	0.0290764	0.00606073	5595/5594	2
hsa05017	Spinocerebellar ataxia	3/50	98/8031	0.0228347	0.029952	0.00624326	5599/2475/207	3
hsa04640	Hematopoietic cell lineage	3/50	99/8031	0.023447	0.0305567	0.0063693	3569/7124/3553	3
hsa04922	Glucagon signaling pathway	3/50	106/8031	0.0279828	0.0362341	0.0075527	207/1385/2033	3
hsa05034	Alcoholism	4/50	187/8031	0.0285231	0.0366985	0.0076495	5595/5594/5604/1385	4
hsa05030	Cocaine addiction	2/50	49/8031	0.0370984	0.0474295	0.0098863	3725/1385	2
